# Supplementary material for: Ice nucleating properties of the sea ice diatom Fragilariopsis cylindrus and its exudates
Source: Copernicus journal article supplement (doi:10.5194/bg-20-1-2023), 2023-01-02
Supplement: Supplementary file 1 [file bg-20-1-2023-supplement.zip]

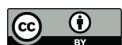

## *Supplement of*

# **Ice nucleating properties of the sea ice diatom *Fragilariopsis cylindrus* and its exudates**

**Lukas Eickhoff et al.**

*Correspondence to:* Thomas Koop ([thomas.koop@uni-bielefeld.de](mailto:thomas.koop@uni-bielefeld.de))

- [bg-20-1-2023-supplement-title-page.pdf](#)
- [Data\\_Fcyl\\_Paper.xlsx](#)
- [F. cylindrus SI\\_final submission\\_corrected.pdf](#)

The copyright of individual parts of the supplement might differ from the article licence.
