# Supplementary material for: Ice nucleating properties of the sea ice diatom Fragilariopsis cylindrus and its exudates
Source: Copernicus journal article supplement (doi:10.5194/bg-20-1-2023), 2023-01-02
Supplement: Supplementary file 1 [file Data_Fcyl_Paper.xlsx]

## Sheet: DSC
Figure S8
sea water			F. cylindrus (1E7 cells mL-1)
T	heat flow		T	heat flow
°C	mW mg-1		°C	mW mg-1
0.0391496	3.107		0.00595828	0.116705
0.0230975	3.10699		-0.0107948	0.116708
0.00537598	3.10699		-0.0268268	0.116712
-0.0104193	3.10698		-0.0430058	0.116713
-0.0225869	3.10698		-0.0562891	0.116716
-0.0354669	3.10698		-0.0689671	0.11672
-0.0525054	3.10698		-0.0856551	0.116726
-0.0694366	3.10698		-0.101793	0.116731
-0.0850416	3.10697		-0.118291	0.116736
-0.0985479	3.10697		-0.130535	0.11674
-0.110872	3.10697		-0.143631	0.11674
-0.127469	3.10696		-0.160392	0.116741
-0.143543	3.10695		-0.176231	0.116739
-0.157306	3.10695		-0.189082	0.116736
-0.16877	3.10694		-0.201201	0.116734
-0.185633	3.10694		-0.217836	0.116733
-0.202394	3.10694		-0.235008	0.116733
-0.219109	3.10693		-0.251158	0.116735
-0.231842	3.10693		-0.263038	0.116739
-0.243565	3.10694		-0.276547	0.116743
-0.260169	3.10693		-0.292511	0.116747
-0.277138	3.10693		-0.310558	0.116749
-0.293504	3.10692		-0.32696	0.116745
-0.306169	3.10692		-0.339091	0.116743
-0.318903	3.10692		-0.352011	0.116745
-0.334897	3.10692		-0.367843	0.116748
-0.351988	3.10692		-0.385465	0.116753
-0.367867	3.10692		-0.402199	0.116759
-0.380825	3.10691		-0.414758	0.116762
-0.393271	3.10691		-0.426569	0.116764
-0.410668	3.1069		-0.442674	0.116768
-0.426766	3.1069		-0.459964	0.116773
-0.444355	3.1069		-0.476014	0.116779
-0.455346	3.1069		-0.488122	0.116784
-0.468695	3.1069		-0.501571	0.11679
-0.486416	3.10691		-0.518207	0.116791
-0.502029	3.10691		-0.534625	0.116789
-0.518593	3.10691		-0.551348	0.116788
-0.530716	3.10691		-0.56383	0.116792
-0.543464	3.10691		-0.575833	0.116796
-0.560116	3.10691		-0.593356	0.116801
-0.576913	3.10691		-0.609077	0.116804
-0.593523	3.1069		-0.62575	0.116803
-0.606433	3.1069		-0.637787	0.116802
-0.61844	3.1069		-0.651209	0.116799
-0.63501	3.10689		-0.668313	0.116793
-0.65241	3.10689		-0.683907	0.116791
-0.668061	3.10689		-0.701081	0.116797
-0.681612	3.10689		-0.713671	0.116807
-0.693146	3.10688		-0.725862	0.116817
-0.709586	3.10688		-0.741907	0.116826
-0.726962	3.10688		-0.759136	0.116829
-0.742752	3.10688		-0.775945	0.116832
-0.755818	3.10688		-0.788378	0.116832
-0.768222	3.10688		-0.801791	0.116836
-0.784317	3.10688		-0.816804	0.116847
-0.802201	3.10688		-0.834745	0.116857
-0.818358	3.10688		-0.851256	0.116863
-0.831459	3.10688		-0.864056	0.116866
-0.843177	3.10688		-0.876439	0.116871
-0.860583	3.10688		-0.892904	0.11688
-0.877227	3.10688		-0.909493	0.116893
-0.893098	3.10688		-0.925639	0.116909
-0.905994	3.10688		-0.937945	0.11692
-0.91822	3.10688		-0.950543	0.116931
-0.935153	3.10689		-0.967556	0.116943
-0.951548	3.10689		-0.983925	0.116948
-0.96412	3.10689		-0.996635	0.11695
-0.976523	3.10689		-1.00917	0.116948
-0.992987	3.10689		-1.02674	0.116945
-1.00995	3.10689		-1.04284	0.116949
-1.02659	3.10689		-1.05891	0.116959
-1.03878	3.10689		-1.07271	0.116968
-1.05161	3.10689		-1.08399	0.116976
-1.06885	3.10689		-1.10058	0.116985
-1.08442	3.10689		-1.11722	0.11699
-1.1014	3.10689		-1.13427	0.116994
-1.11322	3.10689		-1.14714	0.116999
-1.12629	3.10689		-1.15969	0.117002
-1.14351	3.10689		-1.17606	0.117004
-1.15913	3.10689		-1.19163	0.117008
-1.17762	3.10689		-1.20985	0.117013
-1.19	3.10689		-1.22169	0.117013
-1.20162	3.10688		-1.23456	0.117015
-1.21836	3.10688		-1.2514	0.11702
-1.2339	3.10688		-1.2677	0.117028
-1.25097	3.10689		-1.28404	0.11704
-1.26363	3.10689		-1.29643	0.117051
-1.27619	3.10689		-1.30825	0.117059
-1.2922	3.10689		-1.32561	0.117065
-1.30987	3.10689		-1.34167	0.117066
-1.32645	3.10688		-1.35845	0.117064
-1.33986	3.10688		-1.37088	0.117064
-1.35177	3.10688		-1.38371	0.117066
-1.36878	3.10688		-1.40064	0.117072
-1.38402	3.10689		-1.41738	0.117084
-1.40092	3.10689		-1.43355	0.117094
-1.41325	3.10689		-1.44667	0.117099
-1.42621	3.10689		-1.45891	0.117105
-1.44311	3.10689		-1.47619	0.117112
-1.4594	3.1069		-1.49135	0.117117
-1.47608	3.1069		-1.50923	0.117126
-1.48843	3.1069		-1.52095	0.117132
-1.5012	3.10691		-1.53413	0.117135
-1.51798	3.10691		-1.54997	0.11714
-1.53416	3.10692		-1.56752	0.117148
-1.5517	3.10692		-1.58374	0.11716
-1.56494	3.10692		-1.59803	0.117169
-1.5764	3.10692		-1.60896	0.117176
-1.593	3.10692		-1.62569	0.11718
-1.60912	3.10692		-1.64304	0.117184
-1.62549	3.10693		-1.65869	0.117192
-1.6386	3.10693		-1.67134	0.117198
-1.65135	3.10694		-1.68414	0.117205
-1.66804	3.10695		-1.70168	0.117212
-1.68426	3.10695		-1.71724	0.117218
-1.70121	3.10696		-1.73462	0.117224
-1.71393	3.10696		-1.74703	0.117228
-1.72591	3.10696		-1.75847	0.117235
-1.74255	3.10696		-1.77581	0.11724
-1.75901	3.10696		-1.79121	0.117244
-1.77135	3.10696		-1.8042	0.117248
-1.78463	3.10695		-1.81687	0.117253
-1.80152	3.10695		-1.83362	0.117257
-1.81889	3.10695		-1.85029	0.117259
-1.83461	3.10695		-1.86701	0.117263
-1.84736	3.10696		-1.88009	0.117263
-1.86039	3.10696		-1.89186	0.117263
-1.87713	3.10696		-1.90898	0.117267
-1.89324	3.10697		-1.92511	0.117273
-1.90996	3.10697		-1.94154	0.117275
-1.92266	3.10697		-1.95452	0.117279
-1.93437	3.10697		-1.96665	0.117285
-1.95169	3.10698		-1.9832	0.117295
-1.96795	3.10698		-1.99955	0.1173
-1.98474	3.10699		-2.01724	0.117308
-1.99722	3.10699		-2.03025	0.117313
-2.00992	3.10699		-2.04242	0.117316
-2.02686	3.10699		-2.0589	0.117322
-2.04264	3.10698		-2.07469	0.117325
-2.05978	3.10698		-2.09167	0.11733
-2.07208	3.10698		-2.10456	0.117334
-2.08455	3.10697		-2.11703	0.117337
-2.10076	3.10697		-2.13424	0.117343
-2.11808	3.10696		-2.14998	0.117349
-2.13485	3.10696		-2.16654	0.117352
-2.14652	3.10696		-2.18038	0.117354
-2.15983	3.10697		-2.19163	0.117354
-2.17667	3.10697		-2.20831	0.117352
-2.19223	3.10697		-2.22572	0.117351
-2.20994	3.10697		-2.24104	0.117351
-2.22246	3.10697		-2.25437	0.117352
-2.23428	3.10697		-2.26709	0.117356
-2.25122	3.10696		-2.28431	0.117358
-2.26741	3.10696		-2.30099	0.11736
-2.28409	3.10697		-2.31718	0.117363
-2.29793	3.10697		-2.32802	0.117369
-2.30888	3.10697		-2.34218	0.117375
-2.32567	3.10697		-2.35819	0.117384
-2.34295	3.10697		-2.37512	0.117392
-2.35978	3.10697		-2.39135	0.117397
-2.37251	3.10698		-2.40391	0.117398
-2.38452	3.10698		-2.41678	0.117401
-2.40102	3.10699		-2.43332	0.117408
-2.41725	3.10699		-2.44957	0.117414
-2.43505	3.107		-2.46649	0.11742
-2.44706	3.107		-2.47851	0.117423
-2.45861	3.107		-2.49198	0.117424
-2.4763	3.10701		-2.50816	0.117425
-2.49372	3.10701		-2.5255	0.117426
-2.51001	3.10701		-2.54172	0.11743
-2.52158	3.10701		-2.55389	0.117437
-2.53451	3.10702		-2.56704	0.117448
-2.55099	3.10702		-2.58282	0.117462
-2.56821	3.10702		-2.59942	0.117475
-2.58024	3.10703		-2.61266	0.117482
-2.59242	3.10703		-2.62484	0.117485
-2.60968	3.10703		-2.64138	0.117489
-2.62572	3.10702		-2.6574	0.117494
-2.64262	3.10703		-2.67471	0.117502
-2.65565	3.10703		-2.68753	0.117512
-2.66796	3.10703		-2.69952	0.117526
-2.68472	3.10704		-2.71691	0.117543
-2.70133	3.10705		-2.73285	0.117557
-2.71774	3.10705		-2.7503	0.11757
-2.73071	3.10705		-2.76196	0.117579
-2.74204	3.10706		-2.77484	0.11759
-2.76006	3.10706		-2.79237	0.117603
-2.77639	3.10706		-2.80776	0.117616
-2.79173	3.10706		-2.82525	0.117626
-2.8053	3.10707		-2.83762	0.117635
-2.81881	3.10707		-2.85007	0.117642
-2.83477	3.10708		-2.86624	0.117654
-2.85115	3.10708		-2.88311	0.117671
-2.86805	3.10709		-2.90012	0.117686
-2.88063	3.10709		-2.91366	0.117696
-2.89294	3.10709		-2.92408	0.117703
-2.90977	3.10709		-2.94131	0.117711
-2.92642	3.1071		-2.95749	0.117721
-2.94294	3.10711		-2.97563	0.117737
-2.95609	3.10711		-2.98723	0.117749
-2.968	3.10712		-3.00028	0.117759
-2.98484	3.10712		-3.01674	0.117766
-3.00194	3.10712		-3.03366	0.117767
-3.01871	3.10713		-3.04945	0.117769
-3.03034	3.10713		-3.06215	0.117776
-3.04289	3.10713		-3.07466	0.117786
-3.0595	3.10713		-3.0918	0.117802
-3.07648	3.10713		-3.10783	0.117811
-3.09349	3.10714		-3.1249	0.117817
-3.10525	3.10714		-3.13726	0.11782
-3.11883	3.10714		-3.15011	0.117824
-3.13498	3.10714		-3.16647	0.117835
-3.15139	3.10715		-3.18306	0.117848
-3.16857	3.10716		-3.20039	0.117853
-3.18102	3.10716		-3.212	0.117855
-3.19355	3.10716		-3.22488	0.117856
-3.20992	3.10716		-3.24154	0.117857
-3.22734	3.10716		-3.25836	0.117865
-3.24353	3.10716		-3.27483	0.117877
-3.25583	3.10716		-3.28758	0.117884
-3.26824	3.10716		-3.29964	0.117893
-3.28531	3.10716		-3.31669	0.117902
-3.30213	3.10717		-3.3326	0.117908
-3.31836	3.10718		-3.34989	0.117914
-3.33028	3.10718		-3.36234	0.11792
-3.34285	3.10719		-3.37507	0.117926
-3.36015	3.10719		-3.39159	0.117934
-3.37733	3.10719		-3.4085	0.117945
-3.38951	3.10719		-3.42108	0.117957
-3.40212	3.10719		-3.43352	0.117967
-3.41886	3.10719		-3.45023	0.117976
-3.43452	3.10718		-3.467	0.117986
-3.45136	3.10718		-3.48311	0.117995
-3.46492	3.10718		-3.49516	0.118003
-3.4766	3.10719		-3.50796	0.118015
-3.49346	3.10719		-3.52443	0.118035
-3.50966	3.1072		-3.54188	0.118051
-3.52601	3.1072		-3.55879	0.11806
-3.53882	3.1072		-3.57096	0.118064
-3.55179	3.1072		-3.58266	0.118064
-3.56875	3.1072		-3.59999	0.118065
-3.58439	3.10721		-3.61709	0.118069
-3.60165	3.10721		-3.63261	0.11808
-3.61426	3.10722		-3.6453	0.118088
-3.6267	3.10722		-3.65792	0.118097
-3.64338	3.10722		-3.67538	0.118112
-3.66018	3.10722		-3.69072	0.118128
-3.67673	3.10723		-3.70881	0.118143
-3.6892	3.10723		-3.72036	0.11815
-3.70138	3.10723		-3.73384	0.11816
-3.71839	3.10724		-3.75009	0.118172
-3.7352	3.10724		-3.76708	0.118183
-3.75184	3.10724		-3.78354	0.118196
-3.76356	3.10725		-3.79465	0.118209
-3.77685	3.10725		-3.80801	0.118215
-3.79318	3.10725		-3.82486	0.118224
-3.81045	3.10726		-3.84157	0.118239
-3.82702	3.10726		-3.85884	0.118253
-3.83915	3.10726		-3.87027	0.118264
-3.85265	3.10726		-3.88329	0.118276
-3.86799	3.10726		-3.90004	0.11829
-3.88491	3.10726		-3.91647	0.118297
-3.90227	3.10727		-3.9337	0.118304
-3.91298	3.10728		-3.94619	0.118308
-3.92727	3.10728		-3.95889	0.118315
-3.94296	3.10729		-3.9755	0.118327
-3.95985	3.10729		-3.99259	0.118339
-3.97661	3.10729		-4.00872	0.118345
-3.98894	3.10729		-4.02113	0.118349
-4.00155	3.10729		-4.03372	0.118357
-4.01809	3.10729		-4.05045	0.118371
-4.03528	3.1073		-4.06705	0.118389
-4.05164	3.1073		-4.08336	0.118408
-4.06522	3.1073		-4.09628	0.118415
-4.07709	3.10731		-4.10895	0.118418
-4.09369	3.10731		-4.12531	0.11842
-4.1101	3.10732		-4.14259	0.118425
-4.12718	3.10732		-4.15819	0.118432
-4.14026	3.10732		-4.16997	0.118439
-4.15177	3.10732		-4.1843	0.118445
-4.16876	3.10732		-4.20067	0.11845
-4.18598	3.10733		-4.21711	0.118456
-4.19732	3.10733		-4.23026	0.11846
-4.21012	3.10733		-4.2419	0.118467
-4.22642	3.10734		-4.25804	0.118477
-4.24356	3.10734		-4.27597	0.118486
-4.26122	3.10734		-4.29166	0.118491
-4.27261	3.10733		-4.30448	0.118497
-4.28576	3.10733		-4.31687	0.118503
-4.30175	3.10733		-4.33484	0.118507
-4.31834	3.10734		-4.34995	0.118512
-4.33513	3.10734		-4.3674	0.118519
-4.34749	3.10735		-4.38018	0.118521
-4.36022	3.10735		-4.3925	0.118523
-4.3764	3.10736		-4.40935	0.118525
-4.39352	3.10736		-4.42642	0.118532
-4.4108	3.10736		-4.44221	0.118542
-4.42323	3.10736		-4.45411	0.118549
-4.43552	3.10736		-4.46768	0.118555
-4.45235	3.10736		-4.48475	0.118566
-4.46916	3.10737		-4.49962	0.118574
-4.48545	3.10737		-4.51743	0.118579
-4.49722	3.10738		-4.52973	0.118587
-4.51052	3.10738		-4.54241	0.118595
-4.52653	3.10739		-4.55867	0.118603
-4.54459	3.10739		-4.57616	0.118611
-4.56032	3.10739		-4.59211	0.11862
-4.57282	3.10739		-4.60557	0.118627
-4.58564	3.10739		-4.61823	0.118631
-4.6014	3.10739		-4.63409	0.118633
-4.61873	3.10739		-4.65064	0.118633
-4.63609	3.1074		-4.66712	0.118633
-4.64846	3.1074		-4.6801	0.118635
-4.66004	3.1074		-4.69227	0.118639
-4.67691	3.10741		-4.70934	0.118643
-4.69407	3.1074		-4.72589	0.118646
-4.71096	3.1074		-4.74237	0.118649
-4.72391	3.1074		-4.75539	0.118651
-4.73561	3.1074		-4.76832	0.118654
-4.75233	3.1074		-4.78371	0.11866
-4.76852	3.1074		-4.80073	0.118665
-4.78618	3.1074		-4.8175	0.118669
-4.79802	3.10741		-4.83015	0.11867
-4.8104	3.10741		-4.84281	0.118669
-4.82751	3.10742		-4.85878	0.118668
-4.84369	3.10742		-4.87609	0.118671
-4.86048	3.10742		-4.89211	0.118678
-4.87341	3.10742		-4.90419	0.118686
-4.88598	3.10743		-4.91767	0.118694
-4.90224	3.10743		-4.93442	0.118701
-4.91936	3.10744		-4.95068	0.118706
-4.93567	3.10745		-4.96777	0.118712
-4.94887	3.10745		-4.98031	0.118716
-4.96129	3.10745		-4.99268	0.118719
-4.97791	3.10745		-5.00957	0.118724
-4.99498	3.10745		-5.02563	0.118726
-5.00788	3.10745		-5.03815	0.118728
-5.01994	3.10746		-5.05106	0.118731
-5.03593	3.10746		-5.06821	0.118736
-5.05279	3.10747		-5.08462	0.11874
-5.0692	3.10747		-5.10189	0.118744
-5.0825	3.10747		-5.11338	0.118748
-5.0946	3.10747		-5.12633	0.118754
-5.11146	3.10747		-5.14214	0.118762
-5.12786	3.10746		-5.15983	0.118772
-5.14402	3.10747		-5.17604	0.118781
-5.15603	3.10746		-5.18795	0.118786
-5.17014	3.10746		-5.20129	0.118791
-5.18614	3.10747		-5.21748	0.118799
-5.20197	3.10747		-5.23466	0.118807
-5.21929	3.10747		-5.25166	0.118818
-5.23307	3.10747		-5.26381	0.118824
-5.24485	3.10747		-5.27656	0.118829
-5.26117	3.10747		-5.29325	0.118832
-5.2773	3.10746		-5.31044	0.118834
-5.29504	3.10746		-5.32696	0.118838
-5.3064	3.10746		-5.33956	0.118847
-5.32023	3.10747		-5.35198	0.118855
-5.33667	3.10748		-5.36803	0.118864
-5.35293	3.10748		-5.38438	0.118868
-5.36967	3.10749		-5.40108	0.11887
-5.38132	3.10748		-5.41455	0.11887
-5.3955	3.10748		-5.4264	0.11887
-5.41063	3.10748		-5.44326	0.118871
-5.42865	3.10748		-5.4599	0.118873
-5.44482	3.10749		-5.4773	0.118875
-5.45815	3.10749		-5.48975	0.118876
-5.47104	3.10749		-5.50171	0.118874
-5.48718	3.1075		-5.51842	0.118872
-5.50304	3.1075		-5.535	0.118874
-5.52047	3.10751		-5.5518	0.118877
-5.53323	3.10751		-5.56332	0.11888
-5.54527	3.10751		-5.57684	0.118885
-5.56256	3.10751		-5.59299	0.11889
-5.57818	3.10751		-5.60914	0.118892
-5.5951	3.10751		-5.627	0.118894
-5.60873	3.10751		-5.63918	0.118894
-5.61994	3.10751		-5.65314	0.118894
-5.63672	3.1075		-5.66818	0.118894
-5.65383	3.1075		-5.68388	0.118894
-5.66975	3.10749		-5.70111	0.118892
-5.68323	3.10749		-5.71355	0.11889
-5.69512	3.10748		-5.72731	0.118888
-5.71167	3.10748		-5.74343	0.118889
-5.72835	3.10747		-5.75924	0.118895
-5.74566	3.10747		-5.77682	0.118903
-5.75764	3.10747		-5.78976	0.118909
-5.77058	3.10747		-5.80214	0.118915
-5.78728	3.10747		-5.81909	0.118919
-5.80321	3.10747		-5.83589	0.118926
-5.81581	3.10747		-5.84704	0.118931
-5.82845	3.10747		-5.86062	0.118937
-5.8455	3.10747		-5.8774	0.118945
-5.86303	3.10747		-5.89431	0.118952
-5.87957	3.10746		-5.91079	0.118957
-5.89202	3.10746		-5.9232	0.11896
-5.90451	3.10747		-5.93585	0.118963
-5.92048	3.10746		-5.95229	0.118959
-5.93751	3.10746		-5.96953	0.118957
-5.95422	3.10746		-5.98587	0.118957
-5.96608	3.10746		-5.9985	0.118954
-5.98017	3.10746		-6.01054	0.118953
-5.99554	3.10746		-6.02743	0.118955
-6.01239	3.10746		-6.04421	0.118958
-6.02912	3.10745		-6.05994	0.118967
-6.04259	3.10744		-6.0736	0.118971
-6.05463	3.10744		-6.08584	0.11897
-6.07238	3.10743		-6.10268	0.118965
-6.08771	3.10743		-6.1195	0.118959
-6.10406	3.10742		-6.13586	0.118952
-6.11746	3.10742		-6.14753	0.11895
-6.12937	3.10742		-6.16109	0.11895
-6.14595	3.10741		-6.17732	0.118953
-6.16255	3.1074		-6.195	0.11896
-6.17893	3.1074		-6.21132	0.118966
-6.19166	3.1074		-6.22324	0.118965
-6.20486	3.1074		-6.2363	0.118963
-6.22164	3.10739		-6.25261	0.118957
-6.23742	3.10738		-6.26915	0.118955
-6.25495	3.10737		-6.28649	0.118956
-6.26669	3.10737		-6.29781	0.118956
-6.28022	3.10737		-6.31135	0.118955
-6.29612	3.10736		-6.32887	0.118954
-6.31305	3.10736		-6.34486	0.118952
-6.32951	3.10736		-6.36111	0.118953
-6.34196	3.10735		-6.37441	0.118953
-6.3551	3.10735		-6.38654	0.118955
-6.37087	3.10735		-6.40358	0.11896
-6.3878	3.10734		-6.41891	0.118963
-6.40475	3.10734		-6.43653	0.118965
-6.41787	3.10733		-6.44844	0.118966
-6.4303	3.10733		-6.4613	0.118968
-6.44626	3.10733		-6.47855	0.118969
-6.46297	3.10733		-6.49431	0.118972
-6.4803	3.10732		-6.51092	0.118974
-6.49253	3.10732		-6.52403	0.118971
-6.50581	3.10731		-6.53579	0.118965
-6.52114	3.10731		-6.55298	0.118957
-6.53889	3.10731		-6.56995	0.118949
-6.55493	3.10731		-6.58588	0.118946
-6.56698	3.1073		-6.59952	0.118949
-6.57951	3.1073		-6.6118	0.118951
-6.59646	3.10729		-6.62822	0.118955
-6.6127	3.10728		-6.64496	0.118963
-6.62628	3.10728		-6.65839	0.118969
-6.63871	3.10727		-6.66951	0.118972
-6.65458	3.10727		-6.68683	0.118974
-6.67084	3.10726		-6.70299	0.118977
-6.68786	3.10725		-6.72016	0.118977
-6.69999	3.10725		-6.73298	0.118977
-6.71375	3.10724		-6.74515	0.118976
-6.72935	3.10724		-6.76284	0.118975
-6.74684	3.10723		-6.77806	0.118972
-6.76311	3.10723		-6.79507	0.118969
-6.77624	3.10722		-6.80851	0.118968
-6.78788	3.10722		-6.81939	0.118967
-6.80553	3.10722		-6.83747	0.118968
-6.82205	3.10721		-6.85405	0.118972
-6.83823	3.10721		-6.87103	0.118979
-6.85136	3.1072		-6.8828	0.118981
-6.86334	3.1072		-6.89606	0.118981
-6.88044	3.1072		-6.91181	0.118982
-6.89731	3.1072		-6.92904	0.118983
-6.91311	3.1072		-6.94501	0.118984
-6.92644	3.10719		-6.958	0.118986
-6.93992	3.10719		-6.97014	0.118982
-6.95589	3.10719		-6.98704	0.118973
-6.97266	3.10718		-7.00431	0.118967
-6.98888	3.10718		-7.02069	0.118964
-7.00232	3.10718		-7.03352	0.118966
-7.0141	3.10718		-7.04585	0.118968
-7.0313	3.10718		-7.0623	0.118968
-7.04709	3.10717		-7.07878	0.118962
-7.064	3.10716		-7.09597	0.118957
-7.07719	3.10715		-7.10946	0.118952
-7.08986	3.10715		-7.12134	0.118945
-7.10621	3.10714		-7.13816	0.118942
-7.12267	3.10714		-7.15461	0.118939
-7.13935	3.10713		-7.17114	0.118938
-7.15174	3.10713		-7.18347	0.118941
-7.16446	3.10712		-7.19624	0.118945
-7.18106	3.10711		-7.21188	0.118953
-7.19763	3.1071		-7.23034	0.118959
-7.21506	3.10709		-7.24615	0.118958
-7.22697	3.10709		-7.25911	0.118955
-7.23941	3.10708		-7.27181	0.118948
-7.25591	3.10708		-7.28786	0.118941
-7.273	3.10707		-7.30371	0.118936
-7.28962	3.10706		-7.32152	0.11893
-7.30097	3.10705		-7.3331	0.118926
-7.31512	3.10705		-7.34644	0.118924
-7.3314	3.10704		-7.36292	0.118919
-7.34819	3.10703		-7.37959	0.118912
-7.36454	3.10702		-7.39592	0.118904
-7.37763	3.10701		-7.40835	0.118901
-7.38948	3.107		-7.42144	0.118899
-7.40603	3.107		-7.43816	0.118902
-7.42309	3.10699		-7.45493	0.118906
-7.43608	3.10699		-7.46679	0.118908
-7.44828	3.10698		-7.47931	0.118909
-7.46445	3.10698		-7.49642	0.11891
-7.4819	3.10697		-7.51341	0.118911
-7.49845	3.10696		-7.53041	0.11891
-7.5112	3.10695		-7.54245	0.118911
-7.52391	3.10695		-7.55493	0.11891
-7.54055	3.10695		-7.57139	0.118911
-7.55711	3.10694		-7.58851	0.118912
-7.57357	3.10694		-7.60485	0.118913
-7.58567	3.10694		-7.61872	0.118914
-7.59896	3.10693		-7.62922	0.118916
-7.61491	3.10693		-7.64651	0.118917
-7.6321	3.10692		-7.66462	0.11892
-7.6485	3.10692		-7.68041	0.118922
-7.66136	3.10691		-7.69217	0.118922
-7.67351	3.10691		-7.70556	0.118925
-7.69065	3.1069		-7.7219	0.118932
-7.70686	3.10689		-7.73917	0.118932
-7.72477	3.10688		-7.755	0.118933
-7.73718	3.10687		-7.76856	0.118933
-7.74893	3.10687		-7.78136	0.118931
-7.76651	3.10685		-7.79829	0.118929
-7.78297	3.10684		-7.81355	0.118929
-7.79928	3.10684		-7.83134	0.118927
-7.81141	3.10683		-7.84274	0.118923
-7.82475	3.10683		-7.85691	0.118921
-7.84131	3.10682		-7.87156	0.118917
-7.85777	3.10681		-7.88952	0.118912
-7.87417	3.1068		-7.90441	0.118912
-7.88827	3.1068		-7.91814	0.118916
-7.89869	3.10679		-7.93101	0.118917
-7.91628	3.10679		-7.94706	0.118916
-7.93321	3.10678		-7.96378	0.118915
-7.94879	3.10677		-7.98079	0.118908
-7.96221	3.10676		-7.99273	0.118899
-7.9741	3.10675		-8.0054	0.118892
-7.99158	3.10674		-8.02378	0.118882
-8.00759	3.10674		-8.03929	0.118871
-8.02471	3.10673		-8.05586	0.118865
-8.03774	3.10672		-8.06892	0.118864
-8.04827	3.10671		-8.08147	0.118863
-8.06596	3.10669		-8.09792	0.118864
-8.0831	3.10668		-8.11478	0.118864
-8.09987	3.10667		-8.1314	0.118863
-8.11102	3.10667		-8.14512	0.118862
-8.12495	3.10667		-8.15647	0.118864
-8.14153	3.10666		-8.17253	0.118865
-8.15887	3.10665		-8.19044	0.118863
-8.17518	3.10665		-8.20544	0.118854
-8.18697	3.10665		-8.21837	0.118847
-8.19946	3.10664		-8.23167	0.118841
-8.21631	3.10663		-8.24848	0.118838
-8.23373	3.10662		-8.26476	0.118837
-8.24538	3.10661		-8.27719	0.118837
-8.25799	3.10661		-8.2891	0.118832
-8.27579	3.1066		-8.30612	0.118821
-8.29156	3.1066		-8.32339	0.118812
-8.3079	3.1066		-8.33952	0.118802
-8.321	3.1066		-8.35269	0.118797
-8.33349	3.10659		-8.36519	0.118795
-8.35055	3.10659		-8.38226	0.118796
-8.36704	3.10658		-8.39874	0.1188
-8.38464	3.10658		-8.41457	0.118803
-8.39648	3.10657		-8.42755	0.118804
-8.40926	3.10657		-8.44021	0.118804
-8.42587	3.10656		-8.45683	0.118804
-8.44148	3.10655		-8.47307	0.118802
-8.45889	3.10654		-8.49084	0.118802
-8.47185	3.10653		-8.50299	0.118801
-8.48429	3.10652		-8.51583	0.118799
-8.50112	3.10651		-8.53192	0.118798
-8.51812	3.1065		-8.54862	0.118798
-8.53443	3.10649		-8.56534	0.118796
-8.54537	3.10648		-8.57748	0.118792
-8.55969	3.10647		-8.59087	0.118791
-8.57682	3.10647		-8.60818	0.11879
-8.59313	3.10646		-8.62465	0.118787
-8.60927	3.10645		-8.64065	0.118781
-8.62228	3.10644		-8.65357	0.118775
-8.63463	3.10644		-8.66673	0.118772
-8.6513	3.10643		-8.68212	0.118765
-8.66824	3.10642		-8.69879	0.11876
-8.68441	3.10641		-8.71619	0.11876
-8.69678	3.1064		-8.72625	0.11876
-8.70949	3.1064		-8.74072	0.118756
-8.72645	3.10639		-8.75687	0.118751
-8.74372	3.10638		-8.77457	0.11875
-8.75939	3.10636		-8.79089	0.118751
-8.77348	3.10635		-8.80312	0.118751
-8.78492	3.10634		-8.81642	0.118751
-8.8018	3.10633		-8.83277	0.118749
-8.81786	3.10632		-8.8499	0.118741
-8.83473	3.10631		-8.86634	0.118735
-8.84809	3.10631		-8.87845	0.11873
-8.85967	3.1063		-8.89135	0.11873
-8.87677	3.10629		-8.90715	0.118729
-8.89271	3.10629		-8.92536	0.118731
-8.9105	3.10628		-8.94126	0.118729
-8.92217	3.10627		-8.95413	0.118726
-8.93568	3.10626		-8.96672	0.118724
-8.95188	3.10625		-8.98352	0.11872
-8.96789	3.10624		-9	0.118712
-8.98467	3.10623		-9.01617	0.118709
-8.99844	3.10623		-9.02835	0.118709
-9.01082	3.10622		-9.04207	0.118708
-9.02798	3.10622		-9.05823	0.118707
-9.04331	3.10621		-9.07507	0.118701
-9.0578	3.1062		-9.08625	0.118697
-9.06853	3.10619		-9.09942	0.118692
-9.08536	3.10618		-9.11704	0.118685
-9.10312	3.10618		-9.13276	0.11868
-9.11927	3.10617		-9.14971	0.118676
-9.13183	3.10616		-9.16289	0.118673
-9.14406	3.10616		-9.175	0.118672
-9.16084	3.10615		-9.19201	0.118671
-9.17702	3.10615		-9.20842	0.118668
-9.19431	3.10614		-9.22539	0.118668
-9.20634	3.10614		-9.2383	0.118664
-9.21921	3.10613		-9.25092	0.118658
-9.23652	3.10612		-9.26728	0.118655
-9.25216	3.10611		-9.28383	0.118658
-9.26983	3.1061		-9.30006	0.118666
-9.28077	3.10609		-9.31353	0.118671
-9.29441	3.10608		-9.32625	0.118673
-9.31159	3.10606		-9.34253	0.118672
-9.32779	3.10605		-9.35948	0.118664
-9.34428	3.10604		-9.37636	0.118656
-9.356	3.10603		-9.38854	0.118653
-9.37025	3.10602		-9.40096	0.118652
-9.38721	3.10601		-9.4179	0.11865
-9.4026	3.106		-9.43493	0.118648
-9.41913	3.10599		-9.45037	0.118646
-9.4329	3.10599		-9.46303	0.11864
-9.44482	3.10599		-9.4756	0.118634
-9.46192	3.10598		-9.49244	0.118628
-9.47836	3.10597		-9.50925	0.118625
-9.4947	3.10596		-9.52618	0.118622
-9.50822	3.10595		-9.53898	0.11862
-9.51952	3.10594		-9.5517	0.118617
-9.53636	3.10593		-9.56836	0.118607
-9.55296	3.10592		-9.58453	0.118595
-9.56985	3.10591		-9.60122	0.118589
-9.58229	3.10591		-9.61401	0.118588
-9.59519	3.1059		-9.62672	0.118586
-9.61203	3.10589		-9.64263	0.118587
-9.62921	3.10588		-9.66013	0.118583
-9.64536	3.10587		-9.67649	0.118575
-9.65825	3.10586		-9.6895	0.118572
-9.66992	3.10586		-9.70113	0.118572
-9.68752	3.10585		-9.71843	0.118575
-9.70395	3.10585		-9.73536	0.118576
-9.72035	3.10584		-9.75165	0.118574
-9.73177	3.10584		-9.76387	0.118571
-9.74593	3.10583		-9.77712	0.118572
-9.76172	3.10583		-9.79371	0.118573
-9.77945	3.10582		-9.81027	0.118572
-9.7957	3.10582		-9.82596	0.11857
-9.80844	3.10581		-9.83949	0.118568
-9.82104	3.10581		-9.85149	0.118566
-9.83733	3.1058		-9.86895	0.118566
-9.85519	3.10579		-9.88613	0.118566
-9.86758	3.10579		-9.89754	0.118566
-9.87921	3.10578		-9.91026	0.118564
-9.89592	3.10577		-9.92727	0.118559
-9.91254	3.10577		-9.94398	0.118555
-9.93054	3.10576		-9.96015	0.11856
-9.94176	3.10575		-9.97379	0.118565
-9.95427	3.10574		-9.98539	0.118572
-9.97089	3.10574		-10.0023	0.118573
-9.98853	3.10573		-10.0188	0.11857
-10.0048	3.10572		-10.0354	0.118566
-10.0173	3.10571		-10.0472	0.118565
-10.0304	3.1057		-10.0614	0.118563
-10.0468	3.1057		-10.0779	0.11856
-10.0636	3.1057		-10.0936	0.118556
-10.08	3.10569		-10.1101	0.118548
-10.0933	3.10569		-10.1239	0.118545
-10.105	3.10568		-10.1362	0.118545
-10.122	3.10567		-10.1529	0.118548
-10.1387	3.10566		-10.1695	0.118555
-10.1554	3.10564		-10.1859	0.118562
-10.1678	3.10564		-10.1983	0.118564
-10.1806	3.10563		-10.211	0.118563
-10.1966	3.10562		-10.2286	0.11856
-10.2133	3.10562		-10.2438	0.118554
-10.2301	3.10561		-10.2616	0.118553
-10.2423	3.10561		-10.2746	0.118554
-10.2551	3.1056		-10.2874	0.118558
-10.2721	3.10559		-10.3034	0.118565
-10.2887	3.10557		-10.3202	0.118569
-10.306	3.10556		-10.3366	0.118571
-10.3183	3.10555		-10.349	0.118571
-10.3312	3.10555		-10.3616	0.118573
-10.3473	3.10554		-10.3782	0.118574
-10.3637	3.10553		-10.3953	0.118577
-10.3809	3.10553		-10.4117	0.118576
-10.3944	3.10552		-10.4239	0.118572
-10.4056	3.10551		-10.4365	0.118568
-10.4229	3.1055		-10.4538	0.118564
-10.4392	3.10549		-10.4702	0.118563
-10.456	3.10548		-10.4868	0.118568
-10.4694	3.10547		-10.4981	0.118575
-10.4804	3.10547		-10.5125	0.118583
-10.4975	3.10546		-10.5285	0.118588
-10.5144	3.10545		-10.5449	0.118588
-10.531	3.10545		-10.5619	0.118581
-10.5439	3.10545		-10.5746	0.118576
-10.5571	3.10544		-10.5863	0.11857
-10.5734	3.10544		-10.6034	0.118563
-10.5899	3.10543		-10.6207	0.118557
-10.6069	3.10542		-10.6373	0.118554
-10.6187	3.10542		-10.649	0.118554
-10.6323	3.10541		-10.662	0.118555
-10.6487	3.1054		-10.678	0.118559
-10.665	3.10539		-10.6948	0.118566
-10.6787	3.10539		-10.708	0.118571
-10.6897	3.10538		-10.7208	0.118577
-10.7074	3.10538		-10.7372	0.118584
-10.7231	3.10538		-10.7546	0.118586
-10.7406	3.10537		-10.771	0.118586
-10.7538	3.10536		-10.7824	0.118587
-10.7654	3.10535		-10.7955	0.118591
-10.7823	3.10534		-10.8127	0.118599
-10.7987	3.10533		-10.8295	0.118608
-10.8164	3.10533		-10.8458	0.118618
-10.8283	3.10532		-10.8598	0.118624
-10.8405	3.10531		-10.8711	0.118631
-10.8569	3.1053		-10.8877	0.118635
-10.8738	3.10529		-10.9045	0.118639
-10.8917	3.10528		-10.9208	0.118644
-10.905	3.10527		-10.9337	0.118651
-10.9159	3.10527		-10.9473	0.118657
-10.9325	3.10526		-10.9631	0.118664
-10.9486	3.10525		-10.98	0.118671
-10.9664	3.10524		-10.9965	0.118677
-10.9786	3.10523		-11.009	0.118679
-10.9902	3.10522		-11.0216	0.118683
-11.0078	3.10521		-11.038	0.118688
-11.024	3.1052		-11.0547	0.118695
-11.0408	3.10519		-11.0716	0.118707
-11.0536	3.10518		-11.0852	0.118713
-11.0667	3.10518		-11.0964	0.118722
-11.082	3.10517		-11.1135	0.118732
-11.0984	3.10517		-11.1299	0.118737
-11.1154	3.10516		-11.1471	0.118744
-11.1284	3.10516		-11.1592	0.11875
-11.1414	3.10515		-11.1717	0.118755
-11.1582	3.10514		-11.1891	0.118762
-11.1744	3.10513		-11.2053	0.118774
-11.1906	3.10512		-11.2215	0.118786
-11.2043	3.10512		-11.2338	0.118795
-11.2169	3.10512		-11.2469	0.118801
-11.2342	3.10512		-11.2642	0.118807
-11.2492	3.10511		-11.2805	0.118814
-11.267	3.10511		-11.2975	0.118824
-11.279	3.10511		-11.3093	0.118833
-11.2917	3.1051		-11.3225	0.118842
-11.3078	3.1051		-11.3393	0.118853
-11.3248	3.1051		-11.3552	0.118861
-11.3421	3.1051		-11.3718	0.118867
-11.3547	3.10509		-11.3839	0.11887
-11.3666	3.10509		-11.3972	0.118869
-11.3845	3.10508		-11.414	0.118869
-11.4003	3.10507		-11.4306	0.118875
-11.4172	3.10506		-11.4473	0.118889
-11.4292	3.10505		-11.4592	0.1189
-11.443	3.10505		-11.4725	0.118912
-11.4582	3.10504		-11.4881	0.118926
-11.4752	3.10504		-11.5063	0.118938
-11.4886	3.10504		-11.5175	0.118948
-11.5008	3.10504		-11.531	0.118958
-11.5173	3.10503		-11.5473	0.118971
-11.5345	3.10503		-11.5634	0.118984
-11.5511	3.10502		-11.5815	0.118997
-11.5633	3.10501		-11.593	0.119006
-11.5751	3.10501		-11.6066	0.119013
-11.592	3.105		-11.6216	0.119021
-11.6091	3.105		-11.6391	0.11903
-11.6261	3.10499		-11.6555	0.119039
-11.6379	3.10499		-11.668	0.119048
-11.6511	3.10498		-11.6818	0.119059
-11.6678	3.10497		-11.698	0.119071
-11.6846	3.10497		-11.7146	0.119083
-11.7013	3.10497		-11.7316	0.119098
-11.7138	3.10497		-11.7448	0.119111
-11.7257	3.10497		-11.7566	0.119121
-11.7426	3.10497		-11.7729	0.119133
-11.7591	3.10496		-11.7898	0.119143
-11.7768	3.10496		-11.8062	0.119154
-11.7878	3.10495		-11.8203	0.119163
-11.8011	3.10495		-11.8323	0.119173
-11.8185	3.10495		-11.8482	0.119188
-11.8356	3.10494		-11.8655	0.119199
-11.8505	3.10495		-11.8825	0.119207
-11.8644	3.10495		-11.895	0.11921
-11.8764	3.10495		-11.9067	0.119216
-11.8932	3.10495		-11.9235	0.119226
-11.9101	3.10495		-11.9407	0.119239
-11.9265	3.10494		-11.9566	0.11925
-11.9401	3.10494		-11.9697	0.119257
-11.9517	3.10493		-11.9823	0.119262
-11.9687	3.10493		-11.9986	0.119266
-11.9853	3.10493		-12.0154	0.119275
-12.0014	3.10492		-12.0315	0.11928
-12.0137	3.10492		-12.0446	0.119283
-12.0272	3.10492		-12.0572	0.119283
-12.0444	3.10491		-12.0747	0.119285
-12.0604	3.10491		-12.0902	0.119285
-12.0772	3.1049		-12.1078	0.119288
-12.0911	3.1049		-12.12	0.119291
-12.1024	3.1049		-12.134	0.119295
-12.1188	3.10489		-12.1491	0.119303
-12.1375	3.10489		-12.1651	0.119311
-12.1525	3.10489		-12.1824	0.11932
-12.1651	3.10489		-12.1953	0.119328
-12.1776	3.10489		-12.2076	0.119337
-12.1937	3.10489		-12.2249	0.119348
-12.211	3.10489		-12.2411	0.119359
-12.2273	3.10489		-12.2584	0.119366
-12.2398	3.10489		-12.2706	0.119371
-12.2521	3.10489		-12.2827	0.119376
-12.27	3.10488		-12.2989	0.119381
-12.2859	3.10488		-12.3156	0.119392
-12.2996	3.10487		-12.3293	0.1194
-12.3116	3.10486		-12.3408	0.119405
-12.3282	3.10486		-12.3576	0.119409
-12.3445	3.10485		-12.3751	0.11941
-12.3611	3.10485		-12.3913	0.11941
-12.3731	3.10485		-12.4044	0.119414
-12.3865	3.10485		-12.4163	0.119419
-12.4039	3.10485		-12.433	0.119427
-12.4203	3.10485		-12.4485	0.119432
-12.4366	3.10484		-12.4665	0.119437
-12.4499	3.10485		-12.4784	0.119443
-12.4618	3.10484		-12.4913	0.119449
-12.48	3.10484		-12.5079	0.11946
-12.4954	3.10483		-12.5258	0.119475
-12.5122	3.10483		-12.5419	0.119485
-12.5247	3.10482		-12.5543	0.119488
-12.5358	3.10482		-12.5669	0.119488
-12.5544	3.10482		-12.5832	0.119492
-12.5701	3.10481		-12.6	0.119498
-12.5869	3.10481		-12.6164	0.119511
-12.5994	3.10481		-12.63	0.119522
-12.6114	3.10481		-12.6419	0.119534
-12.6294	3.1048		-12.6583	0.11955
-12.645	3.1048		-12.6757	0.119565
-12.6619	3.1048		-12.6931	0.119576
-12.6745	3.1048		-12.7045	0.119581
-12.6873	3.1048		-12.7172	0.119581
-12.7041	3.1048		-12.7349	0.119581
-12.7212	3.10479		-12.7516	0.119582
-12.7381	3.10479		-12.7678	0.119586
-12.7497	3.10479		-12.7803	0.119596
-12.7629	3.10478		-12.7928	0.119608
-12.7798	3.10478		-12.8093	0.119617
-12.796	3.10478		-12.8271	0.119624
-12.8129	3.10478		-12.8422	0.119626
-12.8248	3.10478		-12.854	0.119626
-12.8385	3.10478		-12.8679	0.119626
-12.8553	3.10478		-12.8854	0.119624
-12.8714	3.10479		-12.9013	0.119621
-12.8885	3.10479		-12.919	0.119621
-12.9004	3.10479		-12.9308	0.119622
-12.9137	3.10479		-12.9428	0.119626
-12.9295	3.10479		-12.9604	0.119632
-12.9466	3.10478		-12.9768	0.119637
-12.9633	3.10478		-12.9934	0.119641
-12.9744	3.10478		-13.0055	0.119646
-12.988	3.10478		-13.0184	0.11965
-13.0047	3.10478		-13.036	0.119655
-13.0215	3.10478		-13.0521	0.119658
-13.0393	3.10479		-13.0691	0.119655
-13.0513	3.10479		-13.0818	0.119653
-13.0639	3.10479		-13.0934	0.119651
-13.0803	3.10479		-13.1112	0.119647
-13.0972	3.10478		-13.1277	0.119646
-13.1092	3.10478		-13.1389	0.119647
-13.1212	3.10478		-13.153	0.119649
-13.1392	3.10478		-13.1694	0.119653
-13.1559	3.10477		-13.1861	0.119653
-13.1725	3.10477		-13.2032	0.119651
-13.1851	3.10477		-13.2159	0.119648
-13.1968	3.10477		-13.2281	0.119646
-13.2138	3.10476		-13.2435	0.119648
-13.2303	3.10476		-13.2609	0.119649
-13.2481	3.10476		-13.2782	0.119645
-13.2593	3.10476		-13.2898	0.119641
-13.2728	3.10476		-13.3039	0.119635
-13.2889	3.10476		-13.3196	0.119627
-13.3063	3.10476		-13.3367	0.11962
-13.3225	3.10476		-13.3533	0.11962
-13.3363	3.10476		-13.3654	0.119618
-13.3475	3.10477		-13.3778	0.119617
-13.3648	3.10477		-13.3952	0.119618
-13.3819	3.10477		-13.4116	0.119617
-13.3984	3.10477		-13.4286	0.119617
-13.4103	3.10477		-13.4413	0.119618
-13.4232	3.10477		-13.4538	0.119616
-13.439	3.10478		-13.4704	0.119611
-13.4566	3.10478		-13.4868	0.119602
-13.4729	3.10478		-13.503	0.119593
-13.486	3.10478		-13.5157	0.119585
-13.4987	3.10478		-13.5283	0.119583
-13.5152	3.10478		-13.5455	0.11958
-13.5318	3.10478		-13.5624	0.119577
-13.5489	3.10478		-13.5782	0.119574
-13.5614	3.10478		-13.5917	0.119571
-13.5739	3.10479		-13.6042	0.11957
-13.5902	3.10479		-13.622	0.119567
-13.6069	3.10479		-13.6378	0.119564
-13.6234	3.1048		-13.6541	0.119562
-13.6359	3.1048		-13.6653	0.119561
-13.6495	3.1048		-13.6788	0.119562
-13.6656	3.10481		-13.696	0.119567
-13.6818	3.10481		-13.713	0.119572
-13.6982	3.10481		-13.7294	0.119578
-13.7115	3.1048		-13.7406	0.119578
-13.724	3.1048		-13.7545	0.119573
-13.7415	3.1048		-13.7715	0.119567
-13.7577	3.10481		-13.7881	0.119562
-13.7744	3.10481		-13.8046	0.11956
-13.7867	3.10482		-13.8173	0.119561
-13.7992	3.10482		-13.8299	0.119563
-13.8151	3.10482		-13.8469	0.119561
-13.8326	3.10483		-13.8635	0.119556
-13.849	3.10482		-13.8802	0.119551
-13.8626	3.10482		-13.893	0.119546
-13.8749	3.10482		-13.9044	0.119542
-13.8904	3.10481		-13.9217	0.119541
-13.9072	3.10481		-13.9388	0.119536
-13.9203	3.10481		-13.9502	0.119533
-13.9328	3.10481		-13.9634	0.119528
-13.9497	3.10482		-13.9812	0.119525
-13.9664	3.10482		-13.9969	0.119522
-13.9837	3.10482		-14.0138	0.119519
-13.9967	3.10482		-14.0257	0.119519
-14.0088	3.10482		-14.0388	0.119519
-14.0252	3.10482		-14.055	0.119514
-14.0409	3.10483		-14.0723	0.119513
-14.0583	3.10483		-14.0893	0.119513
-14.0711	3.10484		-14.1018	0.11951
-14.0838	3.10484		-14.1141	0.119506
-14.1009	3.10485		-14.1301	0.119501
-14.1169	3.10485		-14.1478	0.119492
-14.1332	3.10485		-14.1646	0.119485
-14.1449	3.10485		-14.1776	0.119485
-14.1592	3.10486		-14.1895	0.119485
-14.1751	3.10486		-14.2056	0.119487
-14.1932	3.10486		-14.2226	0.119484
-14.2095	3.10486		-14.2392	0.119481
-14.2216	3.10486		-14.2512	0.119478
-14.2341	3.10487		-14.2644	0.119472
-14.2511	3.10487		-14.2811	0.119465
-14.2668	3.10488		-14.2978	0.119462
-14.2847	3.10488		-14.3147	0.119455
-14.2966	3.10487		-14.3274	0.119451
-14.3094	3.10487		-14.3395	0.119449
-14.3261	3.10487		-14.3562	0.119444
-14.3425	3.10487		-14.3733	0.119439
-14.3604	3.10487		-14.3889	0.119433
-14.3721	3.10487		-14.4014	0.11943
-14.3841	3.10487		-14.4141	0.119431
-14.4022	3.10487		-14.4322	0.119431
-14.4187	3.10488		-14.4473	0.119429
-14.435	3.10488		-14.4655	0.11943
-14.4484	3.10488		-14.4773	0.119431
-14.4598	3.10488		-14.4899	0.119431
-14.4761	3.10488		-14.5071	0.119432
-14.4931	3.10488		-14.5238	0.119428
-14.5105	3.10488		-14.5404	0.11942
-14.5234	3.10488		-14.554	0.119416
-14.5348	3.10488		-14.5651	0.119417
-14.5517	3.10488		-14.5822	0.119418
-14.5679	3.10487		-14.5989	0.11942
-14.5849	3.10487		-14.6156	0.119418
-14.5988	3.10487		-14.6276	0.119417
-14.6104	3.10487		-14.6408	0.119414
-14.6273	3.10486		-14.6567	0.119414
-14.6444	3.10486		-14.6738	0.119414
-14.6602	3.10486		-14.6906	0.119413
-14.6741	3.10486		-14.7031	0.11941
-14.6848	3.10486		-14.7166	0.119411
-14.7013	3.10486		-14.733	0.119411
-14.7192	3.10486		-14.7496	0.119412
-14.731	3.10486		-14.7607	0.119414
-14.7453	3.10487		-14.7745	0.119413
-14.7609	3.10487		-14.7908	0.119409
-14.7777	3.10487		-14.8076	0.119401
-14.794	3.10486		-14.8252	0.11939
-14.8067	3.10486		-14.8372	0.119382
-14.8186	3.10487		-14.8499	0.119381
-14.8367	3.10488		-14.867	0.11938
-14.8528	3.10488		-14.8833	0.119383
-14.8701	3.10487		-14.8995	0.119387
-14.8821	3.10487		-14.9119	0.119388
-14.8949	3.10486		-14.9244	0.119386
-14.9117	3.10485		-14.9416	0.119387
-14.9282	3.10485		-14.9582	0.119387
-14.9445	3.10486		-14.9749	0.119385
-14.9575	3.10486		-14.9877	0.119383
-14.9709	3.10486		-15.0002	0.119383
-14.9865	3.10486		-15.0172	0.119379
-15.0038	3.10486		-15.0337	0.119376
-15.0209	3.10486		-15.0506	0.119381
-15.0337	3.10486		-15.0636	0.119384
-15.0445	3.10486		-15.0753	0.119387
-15.0628	3.10486		-15.0917	0.119388
-15.079	3.10485		-15.1093	0.119382
-15.0956	3.10485		-15.1259	0.119374
-15.1081	3.10485		-15.1383	0.119374
-15.1204	3.10485		-15.1507	0.119378
-15.1377	3.10485		-15.1674	0.119392
-15.1543	3.10484		-15.1842	0.119406
-15.1707	3.10484		-15.202	0.119413
-15.1835	3.10483		-15.2143	0.119415
-15.1951	3.10483		-15.2268	0.119414
-15.2122	3.10483		-15.243	0.119412
-15.2293	3.10482		-15.2597	0.119407
-15.2462	3.10482		-15.2768	0.119402
-15.2588	3.10481		-15.2887	0.119398
-15.2705	3.10481		-15.3011	0.119391
-15.2874	3.10481		-15.3185	0.119383
-15.3045	3.10481		-15.3356	0.119378
-15.3218	3.10481		-15.351	0.119373
-15.3343	3.1048		-15.3642	0.119371
-15.3467	3.1048		-15.3767	0.119371
-15.3628	3.1048		-15.3935	0.119371
-15.3796	3.1048		-15.4102	0.119375
-15.3966	3.1048		-15.4271	0.119378
-15.4091	3.1048		-15.4381	0.119378
-15.4217	3.1048		-15.451	0.119379
-15.4387	3.1048		-15.4679	0.119378
-15.4543	3.10481		-15.4841	0.119375
-15.4717	3.1048		-15.5024	0.119371
-15.4836	3.1048		-15.5137	0.119366
-15.497	3.1048		-15.5271	0.119364
-15.5133	3.10479		-15.5439	0.119363
-15.5293	3.10479		-15.5612	0.119365
-15.5424	3.10478		-15.5729	0.119368
-15.5551	3.10478		-15.5853	0.119373
-15.5719	3.10478		-15.6018	0.119371
-15.5889	3.10479		-15.6187	0.11937
-15.605	3.10479		-15.6356	0.119371
-15.6179	3.10479		-15.6481	0.119369
-15.6302	3.10479		-15.6609	0.119372
-15.648	3.10479		-15.6778	0.119377
-15.6642	3.10479		-15.6945	0.119385
-15.6806	3.10479		-15.7109	0.119393
-15.6937	3.10479		-15.7246	0.119399
-15.7063	3.10479		-15.7361	0.119402
-15.7229	3.10479		-15.7532	0.119403
-15.7395	3.10479		-15.7697	0.1194
-15.7567	3.10478		-15.7869	0.119397
-15.7698	3.10478		-15.7989	0.119397
-15.782	3.10477		-15.8113	0.119398
-15.7983	3.10477		-15.8282	0.119398
-15.8143	3.10477		-15.8456	0.119399
-15.8315	3.10477		-15.8616	0.119401
-15.8449	3.10476		-15.8736	0.119402
-15.8562	3.10476		-15.8871	0.119406
-15.8734	3.10476		-15.9037	0.119412
-15.8899	3.10475		-15.921	0.119414
-15.9069	3.10474		-15.9371	0.119415
-15.9193	3.10474		-15.9489	0.119415
-15.9312	3.10473		-15.9629	0.119414
-15.9489	3.10473		-15.979	0.119415
-15.9653	3.10472		-15.9948	0.119415
-15.9822	3.10471		-16.0117	0.119409
-15.9945	3.10471		-16.0252	0.119401
-16.0064	3.10471		-16.0376	0.119398
-16.0231	3.1047		-16.0541	0.119397
-16.04	3.10471		-16.072	0.119394
-16.0577	3.10471		-16.0887	0.119396
-16.0698	3.1047		-16.1004	0.119396
-16.0813	3.1047		-16.1124	0.119394
-16.1002	3.1047		-16.1298	0.119393
-16.116	3.10469		-16.1465	0.119396
-16.1327	3.10469		-16.1631	0.119396
-16.1453	3.10469		-16.175	0.119393
-16.1578	3.10469		-16.1876	0.119392
-16.175	3.10468		-16.2046	0.119388
-16.1912	3.10468		-16.2215	0.119384
-16.2079	3.10467		-16.2383	0.119381
-16.2208	3.10467		-16.2507	0.119375
-16.2336	3.10467		-16.2628	0.11937
-16.2495	3.10467		-16.2794	0.119365
-16.2664	3.10467		-16.2967	0.119363
-16.2832	3.10466		-16.3128	0.119367
-16.2954	3.10466		-16.3249	0.119373
-16.3082	3.10466		-16.3388	0.119381
-16.3248	3.10465		-16.3549	0.119389
-16.3416	3.10465		-16.3722	0.119394
-16.3539	3.10464		-16.3843	0.119394
-16.3671	3.10464		-16.3961	0.119398
-16.3834	3.10464		-16.4132	0.119399
-16.3992	3.10464		-16.4305	0.119404
-16.4169	3.10463		-16.4475	0.119405
-16.4285	3.10463		-16.4595	0.119407
-16.4419	3.10463		-16.4718	0.11941
-16.4587	3.10462		-16.4889	0.119419
-16.4757	3.10462		-16.5052	0.119428
-16.4924	3.10462		-16.522	0.119433
-16.5051	3.10462		-16.5353	0.119437
-16.5172	3.10462		-16.5475	0.11944
-16.534	3.10462		-16.564	0.119445
-16.5506	3.10462		-16.5804	0.119453
-16.5671	3.10462		-16.5976	0.119461
-16.5794	3.10462		-16.6105	0.119465
-16.593	3.10462		-16.6225	0.119469
-16.6093	3.10462		-16.6402	0.119473
-16.626	3.10462		-16.656	0.119476
-16.643	3.10462		-16.6728	0.119477
-16.6546	3.10462		-16.6854	0.11948
-16.6676	3.10462		-16.6981	0.119484
-16.6838	3.10461		-16.7151	0.119489
-16.7019	3.10461		-16.7313	0.119493
-16.7179	3.1046		-16.7484	0.1195
-16.7312	3.1046		-16.7604	0.119506
-16.7434	3.1046		-16.7731	0.11951
-16.7603	3.10459		-16.7898	0.119519
-16.7771	3.1046		-16.8065	0.119525
-16.7928	3.1046		-16.8235	0.119525
-16.8065	3.10461		-16.8355	0.119525
-16.8183	3.10461		-16.8485	0.119525
-16.8354	3.1046		-16.8658	0.119528
-16.8519	3.1046		-16.8816	0.119532
-16.8693	3.1046		-16.8985	0.119539
-16.8806	3.1046		-16.9105	0.119544
-16.8937	3.1046		-16.9239	0.119544
-16.9106	3.1046		-16.9401	0.119544
-16.927	3.1046		-16.9575	0.119548
-16.9443	3.10459		-16.9737	0.119549
-16.9573	3.10459		-16.9866	0.119548
-16.9684	3.10459		-16.9999	0.119551
-16.9861	3.10459		-17.016	0.119558
-17.0027	3.10459		-17.0317	0.119565
-17.0186	3.10459		-17.0488	0.119576
-17.0313	3.10459		-17.0619	0.119586
-17.0442	3.10459		-17.0742	0.11959
-17.0619	3.10458		-17.0904	0.119594
-17.0769	3.10457		-17.1075	0.119603
-17.0948	3.10457		-17.1243	0.119608
-17.1065	3.10456		-17.1376	0.119607
-17.1191	3.10456		-17.1496	0.119605
-17.1358	3.10456		-17.1661	0.119603
-17.1531	3.10456		-17.183	0.119604
-17.1639	3.10456		-17.1951	0.119611
-17.1776	3.10455		-17.2075	0.11962
-17.1953	3.10455		-17.2248	0.119634
-17.212	3.10454		-17.2415	0.119644
-17.229	3.10454		-17.2585	0.119654
-17.2415	3.10455		-17.2704	0.119659
-17.2531	3.10455		-17.2836	0.119664
-17.2707	3.10455		-17.2999	0.119668
-17.2869	3.10455		-17.3174	0.11967
-17.3043	3.10456		-17.3338	0.119674
-17.3164	3.10455		-17.3471	0.119678
-17.3293	3.10455		-17.3581	0.119684
-17.3452	3.10456		-17.3758	0.119691
-17.3627	3.10456		-17.3915	0.119697
-17.38	3.10455		-17.4091	0.119699
-17.3926	3.10455		-17.4217	0.119699
-17.4039	3.10455		-17.4345	0.119702
-17.4206	3.10455		-17.4511	0.119712
-17.4383	3.10455		-17.4679	0.119724
-17.4546	3.10455		-17.4849	0.11973
-17.4668	3.10454		-17.4978	0.119732
-17.4789	3.10454		-17.5099	0.119732
-17.4962	3.10453		-17.5261	0.119729
-17.5126	3.10452		-17.5424	0.119732
-17.5295	3.10451		-17.5596	0.11974
-17.5421	3.10451		-17.5726	0.119742
-17.5547	3.10451		-17.5843	0.119744
-17.5718	3.10451		-17.6016	0.119741
-17.5883	3.1045		-17.6173	0.119738
-17.6053	3.1045		-17.6346	0.119739
-17.6172	3.1045		-17.6478	0.119741
-17.63	3.10449		-17.6609	0.119741
-17.6467	3.10449		-17.6773	0.119743
-17.6643	3.10449		-17.6924	0.119747
-17.6803	3.10448		-17.7102	0.119749
-17.6927	3.10449		-17.7231	0.119751
-17.7053	3.10449		-17.735	0.119753
-17.7215	3.10449		-17.7517	0.11975
-17.7385	3.10449		-17.7685	0.119748
-17.7558	3.10448		-17.7852	0.11975
-17.7678	3.10448		-17.798	0.119752
-17.7803	3.10447		-17.8099	0.119756
-17.7977	3.10447		-17.8269	0.119765
-17.8134	3.10447		-17.8433	0.119772
-17.831	3.10447		-17.861	0.11978
-17.844	3.10446		-17.8731	0.119789
-17.855	3.10446		-17.8847	0.119798
-17.8725	3.10446		-17.9025	0.119803
-17.8901	3.10446		-17.9176	0.119803
-17.9052	3.10446		-17.9361	0.119801
-17.919	3.10445		-17.9476	0.119802
-17.9317	3.10445		-17.9611	0.119804
-17.9479	3.10445		-17.9781	0.11981
-17.9649	3.10445		-17.9946	0.119823
-17.9765	3.10444		-18.0075	0.119831
-17.9903	3.10444		-18.0189	0.11984
-18.0064	3.10444		-18.036	0.119852
-18.0231	3.10444		-18.0535	0.119865
-18.0399	3.10444		-18.0702	0.119872
-18.0535	3.10444		-18.0816	0.119875
-18.0644	3.10444		-18.0941	0.119878
-18.0828	3.10445		-18.1118	0.119882
-18.0982	3.10444		-18.1282	0.119889
-18.1157	3.10444		-18.1448	0.119902
-18.1285	3.10443		-18.1582	0.119913
-18.1398	3.10443		-18.1702	0.119924
-18.1575	3.10444		-18.1875	0.119931
-18.1736	3.10444		-18.2043	0.119931
-18.1912	3.10445		-18.2206	0.11993
-18.2029	3.10445		-18.2329	0.119931
-18.2154	3.10446		-18.2461	0.11994
-18.2327	3.10446		-18.262	0.119951
-18.2488	3.10446		-18.2793	0.119957
-18.2659	3.10446		-18.2959	0.119959
-18.2788	3.10446		-18.3076	0.119962
-18.2909	3.10446		-18.3208	0.119968
-18.3073	3.10446		-18.3373	0.119976
-18.3245	3.10446		-18.3546	0.119983
-18.3421	3.10445		-18.3706	0.119988
-18.3534	3.10445		-18.3827	0.119991
-18.3671	3.10445		-18.3952	0.119994
-18.3831	3.10445		-18.4118	0.120003
-18.3996	3.10444		-18.4288	0.120002
-18.4165	3.10444		-18.4461	0.119994
-18.4292	3.10444		-18.4584	0.119988
-18.4421	3.10444		-18.471	0.119984
-18.458	3.10444		-18.4875	0.119984
-18.4748	3.10443		-18.5048	0.119988
-18.4913	3.10443		-18.522	0.119997
-18.5039	3.10443		-18.5342	0.120003
-18.5169	3.10443		-18.5468	0.120009
-18.5338	3.10444		-18.5633	0.120021
-18.5503	3.10444		-18.5796	0.120037
-18.5675	3.10443		-18.5976	0.120047
-18.5801	3.10443		-18.6087	0.12005
-18.5921	3.10442		-18.6218	0.12005
-18.6091	3.10442		-18.639	0.120048
-18.6262	3.10442		-18.6554	0.12005
-18.6425	3.10442		-18.6726	0.120058
-18.6549	3.10443		-18.6847	0.120066
-18.6679	3.10443		-18.697	0.120073
-18.6853	3.10443		-18.7134	0.120078
-18.7012	3.10443		-18.7308	0.120087
-18.7178	3.10444		-18.7489	0.120096
-18.7302	3.10444		-18.7603	0.120101
-18.7438	3.10443		-18.7727	0.120107
-18.7605	3.10443		-18.7896	0.120114
-18.7773	3.10442		-18.8057	0.120121
-18.7899	3.10442		-18.8182	0.120125
-18.8019	3.10442		-18.832	0.12013
-18.8179	3.10442		-18.8481	0.120139
-18.8348	3.10442		-18.8642	0.120147
-18.8513	3.10441		-18.8807	0.120151
-18.8638	3.10441		-18.8933	0.120154
-18.8763	3.10441		-18.9068	0.120155
-18.8938	3.10441		-18.9226	0.120155
-18.9106	3.10441		-18.9404	0.120156
-18.9271	3.10441		-18.9558	0.120156
-18.9393	3.10441		-18.9689	0.120155
-18.9513	3.10441		-18.9811	0.120157
-18.9683	3.10441		-18.9985	0.120165
-18.9853	3.1044		-19.0151	0.120173
-19.0021	3.10439		-19.0316	0.120176
-19.0145	3.10439		-19.0444	0.12018
-19.0261	3.10439		-19.0561	0.120186
-19.0429	3.10439		-19.0733	0.120197
-19.061	3.10439		-19.0898	0.120212
-19.0771	3.1044		-19.1078	0.120223
-19.0908	3.1044		-19.1206	0.120226
-19.1019	3.1044		-19.1324	0.120228
-19.1198	3.1044		-19.1495	0.120232
-19.1355	3.1044		-19.1662	0.120245
-19.1532	3.10441		-19.183	0.120257
-19.1649	3.10441		-19.1943	0.120265
-19.1777	3.10441		-19.2078	0.120272
-19.1947	3.10441		-19.2242	0.120274
-19.2119	3.10441		-19.2415	0.120275
-19.2276	3.10441		-19.2575	0.120277
-19.2407	3.10441		-19.2702	0.12028
-19.2538	3.10441		-19.2835	0.120284
-19.2703	3.10442		-19.3003	0.120296
-19.287	3.10442		-19.3159	0.120307
-19.3038	3.10443		-19.3331	0.120318
-19.3165	3.10443		-19.3466	0.120324
-19.3285	3.10443		-19.3583	0.120327
-19.3452	3.10444		-19.3752	0.120336
-19.3623	3.10444		-19.3915	0.120351
-19.3786	3.10445		-19.4083	0.120378
-19.3909	3.10445		-19.4211	0.120431
-19.4043	3.10445		-19.4332	0.120527
-19.421	3.10446		-19.4504	0.120705
-19.437	3.10446		-19.4665	0.12107
-19.4535	3.10446		-19.483	0.121539
-19.4669	3.10445		-19.4948	0.121884
-19.4794	3.10445		-19.5077	0.122233
-19.4959	3.10445		-19.5249	0.122615
-19.5139	3.10445		-19.5419	0.122952
-19.5298	3.10445		-19.5578	0.123333
-19.5409	3.10446		-19.5701	0.123643
-19.5539	3.10446		-19.5832	0.12387
-19.5709	3.10446		-19.5997	0.124037
-19.5871	3.10445		-19.6167	0.124155
-19.5997	3.10445		-19.63	0.124226
-19.6127	3.10446		-19.641	0.124267
-19.6293	3.10446		-19.6578	0.12431
-19.6469	3.10446		-19.6748	0.124338
-19.6633	3.10446		-19.6912	0.124369
-19.6757	3.10446		-19.7026	0.124413
-19.688	3.10446		-19.7165	0.124431
-19.7057	3.10446		-19.7327	0.124454
-19.7222	3.10447		-19.7499	0.124471
-19.7389	3.10447		-19.766	0.124481
-19.7528	3.10447		-19.7787	0.124488
-19.7635	3.10448		-19.791	0.124493
-19.7804	3.10449		-19.8072	0.124502
-19.7974	3.10449		-19.8254	0.124514
-19.8137	3.10449		-19.8414	0.124524
-19.8264	3.10449		-19.8543	0.124528
-19.8388	3.10449		-19.8667	0.124529
-19.8563	3.1045		-19.884	0.124525
-19.872	3.1045		-19.9	0.124521
-19.8901	3.10451		-19.9162	0.124519
-19.9024	3.10451		-19.9309	0.12452
-19.9137	3.10451		-19.943	0.124522
-19.9312	3.10451		-19.9592	0.124523
-19.9473	3.10451		-19.9746	0.124521
-19.9654	3.10451		-19.9929	0.124514
-19.977	3.1045		-20.0051	0.124508
-19.9905	3.10451		-20.0173	0.124501
-20.0065	3.10451		-20.0346	0.12449
-20.0235	3.10451		-20.0514	0.124482
-20.0401	3.10452		-20.0677	0.124473
-20.0514	3.10452		-20.0801	0.124465
-20.0658	3.10452		-20.0937	0.124456
-20.0817	3.10452		-20.11	0.124443
-20.0973	3.10452		-20.1265	0.124427
-20.1146	3.10453		-20.1435	0.124414
-20.1278	3.10453		-20.1557	0.124406
-20.14	3.10452		-20.1689	0.124401
-20.1554	3.10452		-20.1846	0.124396
-20.1732	3.10451		-20.2026	0.124387
-20.1895	3.10451		-20.2181	0.124366
-20.2027	3.10451		-20.2316	0.124344
-20.2146	3.10451		-20.2439	0.12431
-20.2314	3.10451		-20.2616	0.124289
-20.2487	3.10451		-20.2774	0.124273
-20.2655	3.10452		-20.2943	0.12426
-20.2781	3.10452		-20.3081	0.124249
-20.2903	3.10453		-20.3191	0.124237
-20.307	3.10454		-20.3359	0.12422
-20.3232	3.10454		-20.3531	0.124204
-20.3412	3.10455		-20.37	0.124184
-20.353	3.10455		-20.3815	0.124167
-20.3664	3.10455		-20.3939	0.124148
-20.3822	3.10456		-20.4112	0.124126
-20.3996	3.10457		-20.4285	0.124109
-20.4117	3.10458		-20.4401	0.124096
-20.4255	3.10458		-20.4528	0.124085
-20.4413	3.10459		-20.4708	0.124068
-20.459	3.10459		-20.4869	0.124049
-20.4749	3.1046		-20.5038	0.124029
-20.4888	3.1046		-20.5165	0.124014
-20.5006	3.1046		-20.53	0.123998
-20.5168	3.1046		-20.5463	0.123973
-20.5338	3.10461		-20.5622	0.12395
-20.5507	3.10461		-20.5786	0.123929
-20.5634	3.10462		-20.5916	0.123917
-20.5756	3.10463		-20.6044	0.123902
-20.592	3.10463		-20.6206	0.123884
-20.6091	3.10463		-20.6384	0.123862
-20.6256	3.10463		-20.6539	0.123843
-20.6391	3.10463		-20.667	0.123831
-20.651	3.10463		-20.6798	0.123814
-20.6672	3.10463		-20.6952	0.123791
-20.6836	3.10463		-20.7131	0.123771
-20.7005	3.10463		-20.7294	0.123752
-20.7139	3.10463		-20.7424	0.123739
-20.7258	3.10463		-20.7544	0.123724
-20.7421	3.10463		-20.7712	0.123703
-20.7589	3.10463		-20.7879	0.123681
-20.776	3.10463		-20.8054	0.123658
-20.7878	3.10464		-20.8166	0.123642
-20.801	3.10464		-20.8298	0.123629
-20.818	3.10464		-20.8463	0.123616
-20.8343	3.10464		-20.8633	0.123602
-20.8511	3.10464		-20.8807	0.123591
-20.8647	3.10464		-20.8927	0.123579
-20.8764	3.10464		-20.9055	0.123564
-20.893	3.10465		-20.9224	0.123543
-20.9094	3.10465		-20.939	0.123526
-20.927	3.10466		-20.9548	0.123513
-20.9394	3.10466		-20.9673	0.123506
-20.952	3.10467		-20.9811	0.123495
-20.9687	3.10468		-20.9971	0.123478
-20.9852	3.10468		-21.0139	0.123464
-21.0026	3.10468		-21.0313	0.123456
-21.0145	3.10469		-21.0433	0.123452
-21.0277	3.10469		-21.056	0.123448
-21.0439	3.1047		-21.0737	0.123434
-21.0597	3.1047		-21.0899	0.123416
-21.0778	3.10471		-21.1061	0.1234
-21.0884	3.10471		-21.1188	0.123388
-21.1029	3.10471		-21.1314	0.123378
-21.1192	3.10472		-21.1476	0.123367
-21.1359	3.10472		-21.1641	0.123353
-21.1519	3.10472		-21.1821	0.123332
-21.1657	3.10471		-21.1944	0.123316
-21.1784	3.10471		-21.207	0.123299
-21.1947	3.10471		-21.2242	0.123281
-21.211	3.10472		-21.2406	0.123266
-21.2229	3.10472		-21.2527	0.123258
-21.236	3.10473		-21.2654	0.123248
-21.2527	3.10474		-21.2817	0.123234
-21.2697	3.10474		-21.2989	0.12322
-21.2875	3.10474		-21.3164	0.123206
-21.2987	3.10475		-21.3284	0.123194
-21.3118	3.10475		-21.3411	0.123183
-21.3284	3.10476		-21.3573	0.123168
-21.3452	3.10476		-21.3745	0.123154
-21.3615	3.10476		-21.3911	0.123142
-21.374	3.10477		-21.4051	0.123136
-21.387	3.10477		-21.4157	0.123132
-21.4044	3.10477		-21.4329	0.123126
-21.42	3.10477		-21.4497	0.12312
-21.4373	3.10477		-21.4658	0.123113
-21.4506	3.10477		-21.4789	0.123104
-21.4615	3.10477		-21.4916	0.12309
-21.4783	3.10478		-21.5087	0.123067
-21.4959	3.10478		-21.5243	0.123047
-21.5126	3.10478		-21.5412	0.123032
-21.5249	3.10478		-21.5542	0.123024
-21.538	3.10478		-21.5667	0.123018
-21.5549	3.10478		-21.5831	0.123011
-21.5706	3.10478		-21.6003	0.123
-21.5873	3.10478		-21.617	0.122988
-21.6004	3.10478		-21.6289	0.122979
-21.6134	3.10479		-21.6422	0.122972
-21.6297	3.10479		-21.6582	0.12296
-21.6459	3.10479		-21.6748	0.12295
-21.6634	3.1048		-21.6919	0.122938
-21.6753	3.1048		-21.7048	0.122929
-21.6887	3.10481		-21.7176	0.122922
-21.7042	3.10481		-21.7335	0.122912
-21.7213	3.10482		-21.7508	0.122908
-21.7383	3.10482		-21.7677	0.122904
-21.7512	3.10483		-21.7796	0.1229
-21.7625	3.10483		-21.7931	0.122899
-21.7799	3.10484		-21.8094	0.1229
-21.7967	3.10484		-21.8266	0.122895
-21.8135	3.10484		-21.8429	0.12289
-21.8245	3.10484		-21.8564	0.122886
-21.8393	3.10485		-21.8685	0.122877
-21.8554	3.10486		-21.8854	0.122867
-21.8715	3.10487		-21.9016	0.122864
-21.8885	3.10487		-21.9179	0.122866
-21.9027	3.10488		-21.9317	0.122866
-21.9146	3.10488		-21.9436	0.122864
-21.9312	3.10489		-21.9605	0.122856
-21.9476	3.10489		-21.9756	0.122843
-21.9642	3.10489		-21.993	0.122832
-21.9762	3.1049		-22.0068	0.122826
-21.9899	3.1049		-22.0187	0.122824
-22.0058	3.10491		-22.0351	0.122822
-22.023	3.10492		-22.0523	0.122819
-22.0367	3.10492		-22.0651	0.122815
-22.0479	3.10493		-22.0766	0.122807
-22.0644	3.10493		-22.0942	0.122795
-22.0814	3.10494		-22.1108	0.122786
-22.0986	3.10495		-22.1288	0.122781
-22.1112	3.10495		-22.1396	0.122778
-22.1236	3.10496		-22.1534	0.122779
-22.1408	3.10497		-22.1697	0.122778
-22.1568	3.10498		-22.1862	0.122776
-22.1736	3.10498		-22.2031	0.122772
-22.1852	3.10499		-22.2154	0.122768
-22.198	3.10499		-22.2279	0.122765
-22.215	3.105		-22.2449	0.122766
-22.2313	3.105		-22.2616	0.122768
-22.2483	3.105		-22.2782	0.122769
-22.2621	3.10501		-22.2909	0.122766
-22.2741	3.10501		-22.3032	0.122763
-22.2905	3.10501		-22.3199	0.122763
-22.308	3.10501		-22.3364	0.122765
-22.324	3.10502		-22.3531	0.122767
-22.3362	3.10502		-22.3669	0.122765
-22.3493	3.10503		-22.3786	0.122757
-22.3659	3.10503		-22.3946	0.122748
-22.3824	3.10504		-22.4121	0.122744
-22.4002	3.10505		-22.4278	0.122745
-22.4121	3.10506		-22.441	0.122749
-22.4253	3.10507		-22.4546	0.122751
-22.4411	3.10508		-22.4707	0.122751
-22.458	3.10509		-22.4875	0.122751
-22.4754	3.10509		-22.5042	0.12275
-22.4882	3.1051		-22.5172	0.12275
-22.5003	3.1051		-22.5287	0.122749
-22.516	3.1051		-22.5457	0.122746
-22.5336	3.10511		-22.5623	0.122743
-22.5507	3.10512		-22.5793	0.12274
-22.5625	3.10513		-22.5923	0.12274
-22.5756	3.10513		-22.6046	0.122742
-22.5913	3.10514		-22.6208	0.122746
-22.609	3.10515		-22.638	0.122752
-22.6252	3.10515		-22.6547	0.122759
-22.6391	3.10515		-22.6676	0.122765
-22.6499	3.10516		-22.68	0.122766
-22.6669	3.10517		-22.6957	0.122769
-22.6838	3.10517		-22.7122	0.122771
-22.701	3.10518		-22.7308	0.122772
-22.7136	3.10518		-22.7448	0.122773
-22.7256	3.10517		-22.7561	0.122776
-22.7428	3.10517		-22.7712	0.122781
-22.7596	3.10518		-22.788	0.122784
-22.7775	3.10519		-22.8052	0.122787
-22.7879	3.1052		-22.818	0.12279
-22.8016	3.10521		-22.8311	0.122795
-22.8175	3.10522		-22.8471	0.122801
-22.8349	3.10524		-22.864	0.122805
-22.8482	3.10525		-22.8771	0.122811
-22.86	3.10526		-22.8883	0.122814
-22.8763	3.10526		-22.9056	0.122819
-22.8926	3.10526		-22.9224	0.122828
-22.9109	3.10527		-22.9383	0.122838
-22.9225	3.10527		-22.9503	0.122843
-22.9351	3.10527		-22.9646	0.122845
-22.9514	3.10527		-22.9808	0.122841
-22.9693	3.10528		-22.9981	0.122838
-22.9853	3.10529		-23.0153	0.12284
-22.9965	3.10529		-23.0266	0.122845
-23.0113	3.1053		-23.039	0.122853
-23.0271	3.1053		-23.056	0.122864
-23.0433	3.10531		-23.0724	0.122874
-23.0612	3.10531		-23.0909	0.122883
-23.0727	3.10531		-23.1029	0.122885
-23.086	3.10531		-23.1146	0.122887
-23.1022	3.10532		-23.1324	0.122894
-23.1187	3.10533		-23.149	0.122901
-23.1354	3.10534		-23.1653	0.122912
-23.1484	3.10535		-23.1785	0.122926
-23.1607	3.10536		-23.1905	0.122935
-23.1793	3.10536		-23.207	0.122944
-23.1943	3.10537		-23.2242	0.122949
-23.2109	3.10537		-23.2411	0.122952
-23.2235	3.10538		-23.253	0.122952
-23.2361	3.10539		-23.2661	0.122953
-23.2531	3.1054		-23.2826	0.122961
-23.2696	3.10541		-23.3002	0.122972
-23.2867	3.10543		-23.3156	0.122986
-23.2979	3.10544		-23.3268	0.123001
-23.3113	3.10545		-23.3413	0.123011
-23.3285	3.10546		-23.3575	0.123019
-23.3457	3.10547		-23.3745	0.123023
-23.3624	3.10548		-23.3908	0.123028
-23.3752	3.10549		-23.404	0.123031
-23.3876	3.10551		-23.4167	0.123034
-23.4037	3.10552		-23.4321	0.12304
-23.4207	3.10553		-23.4498	0.123048
-23.4367	3.10554		-23.4668	0.123049
-23.4499	3.10555		-23.4794	0.123049
-23.4623	3.10556		-23.4911	0.123052
-23.4787	3.10557		-23.5091	0.123058
-23.4965	3.10558		-23.5254	0.123067
-23.5127	3.10559		-23.542	0.123082
-23.5256	3.10559		-23.5539	0.123095
-23.5376	3.10559		-23.5678	0.123102
-23.5541	3.1056		-23.5841	0.123114
-23.5715	3.10561		-23.6001	0.123127
-23.5876	3.10562		-23.617	0.123137
-23.5998	3.10563		-23.6312	0.123144
-23.6137	3.10563		-23.6418	0.123152
-23.63	3.10564		-23.66	0.123163
-23.6464	3.10565		-23.6759	0.123174
-23.6592	3.10565		-23.6883	0.123184
-23.6714	3.10566		-23.7005	0.123195
-23.6885	3.10566		-23.7185	0.123205
-23.7045	3.10567		-23.7349	0.123212
-23.722	3.10568		-23.7505	0.123217
-23.734	3.10569		-23.7635	0.12322
-23.7475	3.10569		-23.7759	0.123224
-23.7638	3.1057		-23.7928	0.123234
-23.7806	3.10571		-23.8099	0.12324
-23.797	3.10572		-23.8271	0.123243
-23.8108	3.10573		-23.8389	0.123246
-23.8231	3.10574		-23.8522	0.123251
-23.8385	3.10575		-23.868	0.12326
-23.856	3.10576		-23.8851	0.123275
-23.8717	3.10576		-23.9027	0.123285
-23.884	3.10577		-23.9134	0.12329
-23.8977	3.10577		-23.9273	0.123298
-23.9146	3.10578		-23.9433	0.12331
-23.9309	3.10579		-23.9604	0.123319
-23.9476	3.1058		-23.9779	0.123331
-23.9607	3.10581		-23.99	0.123339
-23.9732	3.10581		-24.0026	0.123346
-23.9897	3.10582		-24.018	0.123358
-24.0073	3.10582		-24.0354	0.123373
-24.0241	3.10583		-24.0526	0.123385
-24.0378	3.10584		-24.0652	0.12339
-24.0487	3.10585		-24.078	0.123392
-24.0653	3.10585		-24.0945	0.123396
-24.0818	3.10586		-24.1109	0.123401
-24.0982	3.10587		-24.1283	0.123406
-24.1112	3.10587		-24.1408	0.123415
-24.1239	3.10588		-24.1533	0.123426
-24.1411	3.10588		-24.1697	0.123439
-24.1578	3.10589		-24.1858	0.123451
-24.1739	3.10589		-24.2038	0.12346
-24.1853	3.10589		-24.2149	0.123463
-24.1984	3.1059		-24.2286	0.123469
-24.2155	3.10591		-24.2451	0.123481
-24.2328	3.10591		-24.2619	0.123496
-24.2489	3.10592		-24.278	0.123512
-24.2618	3.10592		-24.2922	0.123523
-24.274	3.10593		-24.3029	0.12353
-24.2925	3.10593		-24.3204	0.123538
-24.3079	3.10594		-24.337	0.123545
-24.3247	3.10594		-24.3541	0.123552
-24.3374	3.10595		-24.3658	0.123556
-24.3498	3.10595		-24.38	0.123559
-24.3658	3.10596		-24.3956	0.123564
-24.383	3.10596		-24.4128	0.12357
-24.3988	3.10597		-24.4297	0.123575
-24.4117	3.10597		-24.442	0.123581
-24.4253	3.10598		-24.4539	0.123592
-24.4412	3.10599		-24.4704	0.123607
-24.4579	3.106		-24.4875	0.123619
-24.4704	3.10601		-24.5005	0.123627
-24.4832	3.10603		-24.5125	0.123635
-24.4998	3.10604		-24.5298	0.123644
-24.5176	3.10605		-24.546	0.123654
-24.5335	3.10605		-24.5631	0.123667
-24.548	3.10605		-24.575	0.123677
-24.5595	3.10606		-24.5882	0.123688
-24.576	3.10606		-24.6047	0.123703
-24.5929	3.10607		-24.6213	0.123719
-24.6093	3.10609		-24.6394	0.123732
-24.6212	3.10609		-24.651	0.123742
-24.6344	3.1061		-24.663	0.12375
-24.6514	3.10611		-24.6793	0.123761
-24.668	3.10611		-24.6971	0.123775
-24.6854	3.10613		-24.7138	0.123787
-24.6959	3.10614		-24.7271	0.123798
-24.7096	3.10615		-24.7395	0.123811
-24.7259	3.10615		-24.7555	0.123827
-24.7439	3.10616		-24.7722	0.123838
-24.7605	3.10616		-24.7895	0.123852
-24.7728	3.10617		-24.8013	0.123867
-24.7858	3.10618		-24.8141	0.12388
-24.802	3.10619		-24.8305	0.123898
-24.8187	3.1062		-24.8481	0.123918
-24.8348	3.10621		-24.8638	0.12394
-24.8476	3.10621		-24.8774	0.123953
-24.8609	3.10622		-24.8888	0.123962
-24.8771	3.10623		-24.9067	0.123969
-24.8934	3.10623		-24.9227	0.123975
-24.9112	3.10623		-24.9405	0.123983
-24.9238	3.10624		-24.9511	0.123991
-24.9354	3.10625		-24.965	0.124004
-24.9524	3.10625		-24.9808	0.124021
-24.9681	3.10626		-24.998	0.124036
-24.9854	3.10627		-25.0145	0.124051
-24.9987	3.10628		-25.029	0.124064
-25.0102	3.10629		-25.0402	0.124076
-25.0278	3.10629		-25.0562	0.12409
-25.0446	3.1063		-25.0739	0.124105
-25.0599	3.10631		-25.09	0.124119
-25.0746	3.10631		-25.1033	0.124128
-25.0871	3.10632		-25.1152	0.12414
-25.103	3.10633		-25.132	0.124153
-25.1199	3.10634		-25.149	0.124167
-25.1362	3.10635		-25.1655	0.124186
-25.1492	3.10635		-25.1785	0.124201
-25.1618	3.10636		-25.191	0.124214
-25.1778	3.10637		-25.2079	0.124227
-25.1948	3.10638		-25.2245	0.124241
-25.2117	3.1064		-25.2414	0.124256
-25.2235	3.10641		-25.253	0.124269
-25.2366	3.10642		-25.2665	0.124283
-25.2542	3.10643		-25.282	0.124296
-25.2711	3.10644		-25.299	0.124306
-25.2838	3.10644		-25.3132	0.124315
-25.2963	3.10645		-25.3245	0.124325
-25.313	3.10646		-25.3413	0.12434
-25.3294	3.10647		-25.3582	0.124358
-25.3462	3.10648		-25.3752	0.124374
-25.3587	3.10649		-25.3882	0.124384
-25.3713	3.10649		-25.4	0.124396
-25.3877	3.1065		-25.4167	0.124412
-25.4045	3.10652		-25.4332	0.124432
-25.4213	3.10652		-25.4507	0.124451
-25.4337	3.10653		-25.4636	0.124469
-25.4461	3.10653		-25.476	0.124483
-25.4622	3.10654		-25.4921	0.124498
-25.4809	3.10654		-25.51	0.124509
-25.4973	3.10655		-25.5256	0.12452
-25.509	3.10656		-25.5389	0.124527
-25.5216	3.10656		-25.5503	0.124537
-25.5389	3.10657		-25.5675	0.124551
-25.5548	3.10658		-25.5844	0.124567
-25.5709	3.10658		-25.6015	0.124584
-25.5841	3.10659		-25.6133	0.124597
-25.5965	3.10659		-25.6262	0.124608
-25.6137	3.1066		-25.6426	0.124622
-25.6308	3.1066		-25.6598	0.124631
-25.6474	3.10661		-25.6764	0.124642
-25.6601	3.10662		-25.6898	0.124652
-25.6719	3.10663		-25.7009	0.124664
-25.6894	3.10664		-25.7177	0.124683
-25.7052	3.10665		-25.7345	0.124702
-25.7215	3.10666		-25.7516	0.124718
-25.7355	3.10667		-25.7635	0.124725
-25.7475	3.10667		-25.7762	0.124731
-25.765	3.10669		-25.7933	0.12474
-25.7809	3.1067		-25.8103	0.124755
-25.7974	3.10671		-25.827	0.124768
-25.8102	3.10672		-25.8407	0.124781
-25.8224	3.10673		-25.8517	0.124793
-25.8397	3.10673		-25.869	0.124807
-25.8559	3.10674		-25.886	0.124826
-25.8729	3.10675		-25.9028	0.124848
-25.8863	3.10676		-25.9141	0.124863
-25.8981	3.10677		-25.9282	0.124879
-25.9153	3.10678		-25.9452	0.124896
-25.9317	3.1068		-25.9609	0.124913
-25.9476	3.10681		-25.9783	0.124932
-25.9609	3.10682		-25.991	0.124946
-25.9741	3.10683		-26.0025	0.124958
-25.991	3.10684		-26.0199	0.124974
-26.0078	3.10685		-26.0362	0.124986
-26.0239	3.10686		-26.0524	0.125004
-26.0361	3.10687		-26.0653	0.12502
-26.0486	3.10688		-26.0785	0.125037
-26.0654	3.10689		-26.0949	0.125053
-26.0825	3.1069		-26.111	0.125064
-26.0958	3.10691		-26.1247	0.125069
-26.1072	3.10691		-26.1369	0.125074
-26.1252	3.10693		-26.1528	0.125085
-26.1409	3.10694		-26.1699	0.1251
-26.1581	3.10696		-26.1861	0.125112
-26.1693	3.10697		-26.1997	0.125117
-26.1835	3.10697		-26.2124	0.12512
-26.1997	3.10699		-26.2295	0.125129
-26.2155	3.107		-26.2456	0.125143
-26.2327	3.10701		-26.2624	0.125162
-26.245	3.10701		-26.2751	0.125178
-26.259	3.10702		-26.2881	0.125194
-26.2744	3.10702		-26.3034	0.125216
-26.2927	3.10704		-26.3198	0.12524
-26.3091	3.10705		-26.3378	0.12526
-26.3207	3.10706		-26.348	0.12527
-26.3343	3.10707		-26.363	0.125278
-26.351	3.10708		-26.3799	0.125292
-26.3673	3.10709		-26.3967	0.125307
-26.3842	3.10709		-26.4132	0.125327
-26.3963	3.1071		-26.4248	0.125342
-26.409	3.1071		-26.4379	0.125349
-26.4254	3.10711		-26.4537	0.125358
-26.4425	3.10712		-26.4706	0.12537
-26.4583	3.10714		-26.4889	0.125382
-26.4709	3.10715		-26.5013	0.125397
-26.4846	3.10715		-26.5133	0.125416
-26.5019	3.10717		-26.5303	0.125441
-26.5171	3.10718		-26.5472	0.125462
-26.5335	3.10719		-26.564	0.125479
-26.5472	3.1072		-26.5753	0.12549
-26.5591	3.1072		-26.5897	0.125501
-26.577	3.10721		-26.6059	0.125518
-26.5936	3.10722		-26.6223	0.125539
-26.6099	3.10724		-26.6385	0.125556
-26.6217	3.10725		-26.6511	0.125569
-26.6343	3.10726		-26.6641	0.125578
-26.6521	3.10727		-26.6809	0.125588
-26.6676	3.10728		-26.6973	0.125598
-26.6853	3.10729		-26.7142	0.125611
-26.6976	3.1073		-26.7263	0.125621
-26.7095	3.10731		-26.7394	0.125635
-26.7271	3.10733		-26.7561	0.125656
-26.7442	3.10734		-26.7725	0.125671
-26.7608	3.10736		-26.7895	0.125688
-26.7725	3.10737		-26.802	0.125699
-26.7859	3.10739		-26.8147	0.125705
-26.8025	3.1074		-26.8315	0.125716
-26.819	3.10741		-26.8487	0.125737
-26.837	3.10742		-26.864	0.125762
-26.8493	3.10743		-26.8767	0.125777
-26.8614	3.10744		-26.8892	0.125791
-26.8783	3.10746		-26.9068	0.125806
-26.8944	3.10747		-26.9232	0.125816
-26.9085	3.10748		-26.9353	0.125824
-26.9197	3.10749		-26.9491	0.125839
-26.9357	3.1075		-26.9652	0.125862
-26.9525	3.10752		-26.9815	0.125885
-26.97	3.10753		-26.9993	0.125908
-26.9818	3.10753		-27.0107	0.125924
-26.9952	3.10754		-27.0239	0.125936
-27.0121	3.10754		-27.0392	0.125952
-27.0282	3.10755		-27.0574	0.125971
-27.0451	3.10756		-27.0747	0.125993
-27.0581	3.10757		-27.0879	0.126013
-27.0709	3.10758		-27.0981	0.126033
-27.0867	3.10759		-27.1161	0.126056
-27.103	3.1076		-27.1324	0.12607
-27.1211	3.10761		-27.1487	0.126086
-27.1317	3.10762		-27.1619	0.1261
-27.1452	3.10763		-27.1754	0.126114
-27.1628	3.10764		-27.1907	0.126131
-27.1791	3.10765		-27.2079	0.126153
-27.1958	3.10766		-27.2254	0.126174
-27.2086	3.10767		-27.2378	0.126186
-27.2214	3.10768		-27.25	0.1262
-27.2374	3.10769		-27.2665	0.126221
-27.2538	3.1077		-27.2836	0.126243
-27.2705	3.10771		-27.3002	0.126266
-27.283	3.10773		-27.3125	0.126285
-27.2964	3.10774		-27.3253	0.126302
-27.3135	3.10775		-27.342	0.126319
-27.3299	3.10777		-27.3574	0.126334
-27.346	3.10778		-27.3751	0.126347
-27.3591	3.10779		-27.3875	0.126356
-27.3715	3.1078		-27.4001	0.126368
-27.3886	3.10781		-27.4168	0.126387
-27.4054	3.10782		-27.4342	0.126403
-27.4216	3.10784		-27.4511	0.126416
-27.4343	3.10785		-27.464	0.126425
-27.4474	3.10786		-27.4753	0.126436
-27.4639	3.10787		-27.4935	0.126454
-27.4801	3.10788		-27.5091	0.126472
-27.4967	3.1079		-27.5253	0.126493
-27.5078	3.10792		-27.539	0.126509
-27.5224	3.10793		-27.5512	0.126522
-27.5397	3.10795		-27.5678	0.126543
-27.556	3.10796		-27.5852	0.12657
-27.5728	3.10797		-27.6008	0.126594
-27.5856	3.10799		-27.613	0.126611
-27.5974	3.108		-27.6267	0.126632
-27.6143	3.10802		-27.6436	0.12666
-27.6312	3.10805		-27.6602	0.126684
-27.648	3.10807		-27.6767	0.126709
-27.6607	3.10808		-27.6902	0.126724
-27.6735	3.1081		-27.7028	0.126734
-27.6902	3.10812		-27.7198	0.126744
-27.7061	3.10813		-27.735	0.12676
-27.7188	3.10815		-27.7488	0.126774
-27.7311	3.10816		-27.7612	0.126791
-27.7474	3.10818		-27.7781	0.126815
-27.7648	3.10819		-27.7939	0.126839
-27.7819	3.10821		-27.8105	0.126858
-27.7938	3.10822		-27.8236	0.126871
-27.8062	3.10823		-27.8363	0.12688
-27.8242	3.10825		-27.8522	0.126895
-27.8402	3.10827		-27.8691	0.126912
-27.8561	3.10829		-27.886	0.126933
-27.87	3.1083		-27.8985	0.126952
-27.8823	3.10831		-27.91	0.126972
-27.8983	3.10832		-27.9279	0.126994
-27.9151	3.10834		-27.944	0.127021
-27.9321	3.10835		-27.961	0.127049
-27.9448	3.10836		-27.9737	0.127067
-27.9573	3.10837		-27.9865	0.127086
-27.9735	3.10839		-28.0029	0.12711
-27.9911	3.10841		-28.0199	0.12713
-28.007	3.10842		-28.0362	0.127151
-28.0204	3.10843		-28.0489	0.127167
-28.0324	3.10845		-28.061	0.127182
-28.0481	3.10846		-28.0779	0.127206
-28.0654	3.10848		-28.0947	0.127229
-28.0827	3.1085		-28.1105	0.127249
-28.0959	3.10852		-28.1237	0.127264
-28.1082	3.10853		-28.1368	0.12728
-28.1251	3.10855		-28.1537	0.127301
-28.1407	3.10857		-28.17	0.127326
-28.1583	3.10858		-28.1869	0.127355
-28.1706	3.1086		-28.2001	0.12738
-28.1833	3.10861		-28.2125	0.127402
-28.1997	3.10863		-28.2298	0.127432
-28.2168	3.10865		-28.2463	0.12746
-28.2347	3.10867		-28.2621	0.127488
-28.246	3.10868		-28.2757	0.127509
-28.2579	3.1087		-28.2876	0.127528
-28.2754	3.10872		-28.3045	0.127549
-28.2921	3.10874		-28.3217	0.127569
-28.3094	3.10876		-28.3381	0.127591
-28.3214	3.10877		-28.3502	0.127607
-28.334	3.10879		-28.3629	0.127624
-28.3512	3.1088		-28.38	0.127647
-28.3669	3.10882		-28.397	0.127667
-28.384	3.10884		-28.413	0.127687
-28.3974	3.10886		-28.4261	0.127703
-28.4088	3.10887		-28.4385	0.127719
-28.4262	3.10889		-28.4556	0.127737
-28.4428	3.10891		-28.4719	0.127748
-28.46	3.10892		-28.4893	0.127756
-28.4732	3.10893		-28.5006	0.127768
-28.4852	3.10894		-28.5138	0.127783
-28.5012	3.10896		-28.5294	0.127806
-28.5181	3.10897		-28.5472	0.127829
-28.5291	3.10898		-28.5596	0.127842
-28.5435	3.10899		-28.5716	0.127854
-28.5599	3.10901		-28.5896	0.127869
-28.5768	3.10903		-28.6049	0.127884
-28.5938	3.10904		-28.6224	0.127907
-28.6056	3.10906		-28.6359	0.127926
-28.6187	3.10907		-28.6478	0.127945
-28.6349	3.10909		-28.6641	0.12797
-28.6514	3.1091		-28.6804	0.127989
-28.6693	3.10911		-28.6979	0.128005
-28.6812	3.10913		-28.7106	0.128019
-28.6933	3.10914		-28.7232	0.128033
-28.7104	3.10916		-28.7392	0.128053
-28.7279	3.10918		-28.7572	0.128076
-28.7441	3.10919		-28.7738	0.1281
-28.7569	3.10921		-28.7853	0.12812
-28.7692	3.10922		-28.7981	0.128141
-28.7859	3.10924		-28.8152	0.128168
-28.8027	3.10925		-28.8323	0.128192
-28.8196	3.10927		-28.8471	0.128216
-28.8326	3.10928		-28.8606	0.128232
-28.8449	3.10929		-28.8733	0.128249
-28.8609	3.10931		-28.89	0.128265
-28.878	3.10933		-28.9062	0.128283
-28.8948	3.10934		-28.9242	0.128301
-28.908	3.10936		-28.937	0.128316
-28.9198	3.10937		-28.9486	0.128334
-28.9366	3.10939		-28.9664	0.128361
-28.9534	3.1094		-28.982	0.128385
-28.9703	3.10942		-28.9995	0.128409
-28.9825	3.10943		-29.0122	0.128426
-28.9956	3.10945		-29.0251	0.128444
-29.0122	3.10946		-29.0414	0.128469
-29.0283	3.10948		-29.0572	0.128496
-29.046	3.10949		-29.0739	0.128517
-29.0574	3.1095		-29.0878	0.128531
-29.0709	3.10951		-29.1007	0.128545
-29.0867	3.10952		-29.1175	0.128565
-29.1042	3.10954		-29.1338	0.12859
-29.1204	3.10956		-29.1498	0.12862
-29.1315	3.10957		-29.1619	0.12864
-29.1456	3.10959		-29.1748	0.128656
-29.1623	3.10961		-29.1923	0.128681
-29.1784	3.10963		-29.2089	0.128704
-29.1949	3.10965		-29.2253	0.128725
-29.208	3.10967		-29.2373	0.12874
-29.2212	3.10968		-29.2502	0.12875
-29.2379	3.1097		-29.2671	0.128761
-29.2546	3.10971		-29.2841	0.128775
-29.2715	3.10973		-29.3004	0.128799
-29.2851	3.10974		-29.3129	0.128818
-29.2965	3.10976		-29.3256	0.128839
-29.3131	3.10978		-29.3436	0.128866
-29.3294	3.10981		-29.3589	0.128892
-29.343	3.10982		-29.3712	0.12891
-29.355	3.10984		-29.3847	0.12893
-29.3725	3.10986		-29.4011	0.128957
-29.3884	3.10988		-29.4178	0.128981
-29.406	3.1099		-29.4337	0.129
-29.4189	3.10992		-29.4475	0.129012
-29.4311	3.10994		-29.4593	0.129023
-29.4474	3.10997		-29.4763	0.129042
-29.464	3.10999		-29.4932	0.129063
-29.4806	3.11001		-29.5089	0.12909
-29.493	3.11002		-29.5227	0.129112
-29.5048	3.11004		-29.5348	0.129132
-29.5231	3.11006		-29.5515	0.129159
-29.5395	3.11008		-29.5676	0.129185
-29.5564	3.1101		-29.5851	0.129213
-29.5688	3.11011		-29.597	0.129234
-29.5811	3.11012		-29.6106	0.129254
-29.5976	3.11014		-29.6271	0.129276
-29.6147	3.11015		-29.6437	0.129298
-29.6311	3.11017		-29.6611	0.129322
-29.6435	3.11018		-29.6747	0.129341
-29.6562	3.1102		-29.6854	0.129363
-29.6736	3.11021		-29.7026	0.12939
-29.6896	3.11023		-29.7189	0.129414
-29.7067	3.11024		-29.7353	0.129433
-29.7197	3.11025		-29.7478	0.129449
-29.7322	3.11027		-29.7611	0.129465
-29.7484	3.11029		-29.7774	0.129486
-29.7658	3.11031		-29.7936	0.129508
-29.7817	3.11033		-29.812	0.129528
-29.7945	3.11034		-29.8232	0.129543
-29.8064	3.11035		-29.8365	0.129558
-29.8235	3.11037		-29.8526	0.129581
-29.84	3.11039		-29.8705	0.129605
-29.8572	3.1104		-29.8867	0.129626
-29.8695	3.11041		-29.8998	0.129642
-29.8828	3.11043		-29.9121	0.12966
-29.9004	3.11044		-29.9287	0.129682
-29.9163	3.11047		-29.9453	0.129708
[truncated: 1,996 more rows]

## Sheet: fice
Figure 2																							Figure 5											Figure 6							Figure 4
F. cyl.		F. cyl.		F. cyl.		F. cyl.		F. cyl.		sea water		F. cyl. (f. 0.22 µm)		F. cyl. (f. 0.22 µm)		F. cyl. (f. 0.22 µm)		F. cyl. (f. 0.22 µm)		F. cyl. (f. 0.22 µm)			fresh f/2 Medium		fresh f/2 Medium		spent f/2 Medium		spent f/2 Medium		spent f/2 Medium			fcIBP11		fcIBP11		Tris-HCL buffer			F. cyl.			F. cyl.			sea water
c = 5E7 cells mL-1		c = 1E7 cells mL-1		c = 2E6 cells mL-1		c = 1E6 cells mL-1		c = 5E5 cells mL-1		salinity 3.45 %		c = 5E7 cells mL-1		c = 1E7 cells mL-1		c = 2E6 cells mL-1		c = 1E6 cells mL-1		c = 5E5 cells mL-1			untreated		f. 100 kDa		untreated		f. 0.22 µm		f. 100 kDa			c = 0.1 mM		c = 0.01 mM					cells and fragments			fragments
T	fice	T	fice	T	fice	T	fice	T	fice	T	fice	T	fice	T	fice	T	fice	T	fice	T	fice		T	fice	T	fice	T	fice	T	fice	T	fice		T	fice	T	fice	T	fice		T	# Droplets	fice	T	# Droplets	fice	T	# Droplets	fice
°C		°C		°C		°C		°C		°C		°C		°C		°C		°C		°C			°C		°C		°C		°C		°C			°C		°C		°C			°C			°C			°C
-29.4	0.005556	-23.2	0.006135	-31.2	0.005848	-32	0.00641	-32.8	0.00578	-29.7	0.005882	-31.6	0.005348	-32.4	0.005587	-29.2	0.00578	-30.1	0.005435	-27.4	0.004926		-32.4	0.003663	-32.7	0.004167	-26.8	0.005952	-32.6	0.005814	-33.5	0.005128		-25.3	0.004975	-29.7	0.003597	-26.6	0.003344		-23.2	1	0.00613497	-32.4	1	0.00558659	-35.7	1	0.00588235
-29.5	0.011111	-31.2	0.01227	-31.8	0.011696	-32.3	0.012821	-33.1	0.011561	-34.9	0.011765	-31.7	0.010695	-32.7	0.011173	-34.5	0.011561	-32.3	0.01087	-35.3	0.009852		-32.8	0.007326	-33.9	0.008333	-33.1	0.011905	-32.6	0.011628	-34.3	0.010256		-30.3	0.00995	-30	0.007194	-27.4	0.006689		-31.2	1	0.0122699	-32.7	2	0.0167598	-38.3	1	0.0117647
-30.1	0.016667	-31.7	0.018405	-32.2	0.017544	-33.5	0.019231	-33.3	0.017341	-37.7	0.017647	-31.9	0.016043	-32.7	0.01676	-34.6	0.017341	-34.3	0.016304	-36.5	0.014778		-34.6	0.010989	-34.6	0.0125	-33.2	0.017857	-34.5	0.017442	-34.3	0.015385		-32.4	0.014925	-32.6	0.010791	-27.9	0.010033		-31.7	1	0.0184049	-33.1	1	0.0223464	-38.6	1	0.0176471
-30.4	0.022222	-32.2	0.02454	-32.8	0.023392	-33.7	0.025641	-33.8	0.023121	-38.2	0.023529	-32	0.02139	-33.1	0.022346	-34.8	0.023121	-34.5	0.021739	-36.8	0.019704		-35.2	0.014652	-34.8	0.016667	-33.6	0.02381	-34.8	0.023256	-35.3	0.020513		-32.7	0.0199	-34.9	0.014388	-28.6	0.013378		-32.2	1	0.0245399	-33.6	1	0.027933	-38.9	2	0.0294118
-30.4	0.027778	-32.3	0.030675	-32.9	0.02924	-33.9	0.032051	-34.4	0.028902	-39.2	0.029412	-32.1	0.026738	-33.6	0.027933	-34.8	0.028902	-34.5	0.027174	-37.2	0.024631		-35.3	0.018315	-35.7	0.020833	-33.7	0.029762	-34.9	0.02907	-35.7	0.025641		-33.1	0.024876	-35	0.017986	-31.1	0.016722		-32.3	1	0.0306748	-33.7	1	0.0335196	-39.2	4	0.0529412
-30.6	0.033333	-32.4	0.03681	-32.9	0.035088	-34	0.038462	-34.4	0.034682	-39.3	0.035294	-32.2	0.032086	-33.7	0.03352	-34.9	0.034682	-35.1	0.032609	-37.3	0.029557		-35.4	0.021978	-36.3	0.025	-34	0.035714	-34.9	0.034884	-35.9	0.030769		-33.1	0.029851	-35.3	0.021583	-33.9	0.020067		-32.4	1	0.0368098	-33.9	1	0.0391061	-39.3	1	0.0588235
-30.7	0.038889	-32.5	0.042945	-33.1	0.040936	-34	0.044872	-34.6	0.040462	-39.4	0.041176	-32.3	0.037433	-33.9	0.039106	-35	0.040462	-35.1	0.038043	-37.3	0.034483		-35.9	0.025641	-36.4	0.029167	-34.1	0.041667	-35	0.040698	-37.5	0.035897		-33.9	0.034826	-35.4	0.02518	-34.7	0.023411		-32.5	2	0.0490798	-34	4	0.0614525	-39.4	1	0.0647059
-30.8	0.044444	-32.5	0.04908	-33.2	0.046784	-34.2	0.051282	-34.6	0.046243	-39.5	0.047059	-32.4	0.042781	-34	0.044693	-35.1	0.046243	-35.5	0.043478	-37.5	0.039409		-36.2	0.029304	-36.4	0.033333	-34.3	0.047619	-35	0.046512	-37.7	0.041026		-34.3	0.039801	-35.7	0.028777	-34.8	0.026756		-32.6	4	0.0736196	-34.1	2	0.0726257	-39.5	3	0.0823529
-30.9	0.05	-32.6	0.055215	-33.2	0.052632	-34.2	0.057692	-34.7	0.052023	-39.5	0.052941	-32.5	0.048128	-34	0.050279	-35.1	0.052023	-35.6	0.048913	-37.6	0.044335		-36.9	0.032967	-37	0.0375	-34.3	0.053571	-35.1	0.052326	-37.8	0.046154		-34.3	0.044776	-36.1	0.032374	-35.4	0.0301		-32.7	3	0.0920245	-34.2	5	0.100559	-39.6	8	0.129412
-31	0.055556	-32.6	0.06135	-33.5	0.05848	-34.3	0.064103	-34.7	0.057803	-39.5	0.058824	-32.5	0.053476	-34	0.055866	-35.1	0.057803	-35.8	0.054348	-38.1	0.049261		-37.2	0.03663	-37.4	0.041667	-34.3	0.059524	-35.1	0.05814	-38	0.051282		-34.4	0.049751	-36.2	0.035971	-36	0.033445		-32.8	2	0.104294	-34.3	5	0.128492	-39.7	4	0.152941
-31	0.061111	-32.6	0.067485	-33.5	0.064327	-34.3	0.070513	-35.1	0.063584	-39.5	0.064706	-32.6	0.058824	-34	0.061453	-35.1	0.063584	-35.9	0.059783	-38.1	0.054187		-37.3	0.040293	-38.3	0.045833	-34.4	0.065476	-35.1	0.063953	-38	0.05641		-34.6	0.054726	-36.3	0.039568	-36.1	0.036789		-32.9	2	0.116564	-34.4	3	0.145251	-39.8	11	0.217647
-31.2	0.066667	-32.6	0.07362	-33.5	0.070175	-34.3	0.076923	-35.2	0.069364	-39.5	0.070588	-32.6	0.064171	-34.1	0.067039	-35.2	0.069364	-36.1	0.065217	-38.1	0.059113		-37.8	0.043956	-38.4	0.05	-34.5	0.071429	-35.2	0.069767	-38.1	0.061538		-34.8	0.059701	-36.4	0.043165	-36.4	0.040134		-33.1	7	0.159509	-34.5	20	0.256983	-39.9	12	0.288235
-31.2	0.072222	-32.7	0.079755	-33.6	0.076023	-34.3	0.083333	-35.2	0.075145	-39.5	0.076471	-32.6	0.069519	-34.1	0.072626	-35.2	0.075145	-36.1	0.070652	-38.4	0.064039		-38	0.047619	-38.6	0.054167	-34.5	0.077381	-35.2	0.075581	-38.1	0.066667		-35.1	0.064677	-36.5	0.046763	-36.7	0.043478		-33.2	4	0.184049	-34.6	9	0.307263	-40	6	0.323529
-31.3	0.077778	-32.7	0.08589	-33.7	0.081871	-34.3	0.089744	-35.3	0.080925	-39.6	0.082353	-32.6	0.074866	-34.2	0.078212	-35.3	0.080925	-36.2	0.076087	-38.5	0.068966		-38.2	0.051282	-38.6	0.058333	-34.6	0.083333	-35.2	0.081395	-38.1	0.071795		-35.2	0.069652	-36.5	0.05036	-37	0.046823		-33.3	5	0.214724	-34.7	12	0.374302	-40.1	17	0.423529
-31.3	0.083333	-32.7	0.092025	-33.8	0.087719	-34.4	0.096154	-35.4	0.086705	-39.6	0.088235	-32.7	0.080214	-34.2	0.083799	-35.3	0.086705	-36.2	0.081522	-38.5	0.073892		-38.3	0.054945	-38.8	0.0625	-34.6	0.089286	-35.2	0.087209	-38.2	0.076923		-35.4	0.074627	-36.6	0.053957	-37.1	0.050167		-33.4	3	0.233129	-34.8	14	0.452514	-40.2	75	0.864706
-31.5	0.088889	-32.8	0.09816	-33.8	0.093567	-34.4	0.102564	-35.5	0.092486	-39.6	0.094118	-32.7	0.085561	-34.2	0.089385	-35.3	0.092486	-36.2	0.086957	-38.7	0.078818		-38.4	0.058608	-39.1	0.066667	-34.6	0.095238	-35.3	0.093023	-38.2	0.082051		-35.5	0.079602	-36.7	0.057554	-37.1	0.053512		-33.5	7	0.276074	-34.9	17	0.547486	-40.3	17	0.964706
-31.5	0.094444	-32.8	0.104294	-33.9	0.099415	-34.5	0.108974	-35.5	0.098266	-39.6	0.1	-32.8	0.090909	-34.2	0.094972	-35.5	0.098266	-36.2	0.092391	-38.9	0.083744		-38.5	0.062271	-39.2	0.070833	-34.6	0.10119	-35.4	0.098837	-38.2	0.087179		-36	0.084577	-36.8	0.061151	-37.2	0.056856		-33.6	8	0.325153	-35	6	0.581006	-40.4	5	0.994118
-31.6	0.1	-32.9	0.110429	-33.9	0.105263	-34.5	0.115385	-35.6	0.104046	-39.6	0.105882	-32.8	0.096257	-34.2	0.100559	-35.5	0.104046	-36.3	0.097826	-39	0.08867		-38.8	0.065934	-39.2	0.075	-34.6	0.107143	-35.4	0.104651	-38.7	0.092308		-36.1	0.089552	-36.8	0.064748	-37.3	0.060201		-33.7	5	0.355828	-35.1	28	0.73743	-40.5	1	1
-31.6	0.105556	-32.9	0.116564	-33.9	0.111111	-34.5	0.121795	-35.7	0.109827	-39.7	0.111765	-32.8	0.101604	-34.3	0.106145	-35.7	0.109827	-36.4	0.103261	-39	0.093596		-38.8	0.069597	-39.3	0.079167	-34.6	0.113095	-35.4	0.110465	-38.8	0.097436		-36.1	0.094527	-36.9	0.068345	-37.7	0.063545		-33.8	8	0.404908	-35.2	13	0.810056
-31.6	0.111111	-33.1	0.122699	-34	0.116959	-34.5	0.128205	-35.8	0.115607	-39.7	0.117647	-32.8	0.106952	-34.3	0.111732	-35.7	0.115607	-36.4	0.108696	-39	0.098522		-39.1	0.07326	-39.5	0.083333	-34.7	0.119048	-35.4	0.116279	-39	0.102564		-36.1	0.099502	-37	0.071942	-37.9	0.06689		-33.9	5	0.435583	-35.3	18	0.910615
-31.7	0.116667	-33.1	0.128834	-34	0.122807	-34.5	0.134615	-35.9	0.121387	-39.7	0.123529	-32.9	0.112299	-34.3	0.117318	-35.7	0.121387	-36.5	0.11413	-39.1	0.103448		-39.1	0.076923	-39.7	0.0875	-34.7	0.125	-35.4	0.122093	-39.2	0.107692		-36.4	0.104478	-37.1	0.07554	-38.1	0.070234		-34	9	0.490798	-35.4	9	0.960894
-31.7	0.122222	-33.1	0.134969	-34	0.128655	-34.5	0.141026	-35.9	0.127168	-39.7	0.129412	-32.9	0.117647	-34.3	0.122905	-35.8	0.127168	-36.5	0.119565	-39.3	0.108374		-39.1	0.080586	-39.8	0.091667	-34.7	0.130952	-35.4	0.127907	-39.3	0.112821		-36.5	0.109453	-37.3	0.079137	-38.2	0.073579		-34.1	11	0.558282	-35.5	2	0.972067
-31.7	0.127778	-33.1	0.141104	-34	0.134503	-34.5	0.147436	-36	0.132948	-39.7	0.135294	-32.9	0.122995	-34.3	0.128492	-35.8	0.132948	-36.5	0.125	-39.3	0.1133		-39.2	0.084249	-39.9	0.095833	-34.8	0.136905	-35.4	0.133721	-39.4	0.117949		-36.5	0.114428	-37.4	0.082734	-38.3	0.076923		-34.2	16	0.656442	-35.6	2	0.98324
-31.7	0.133333	-33.1	0.147239	-34.1	0.140351	-34.5	0.153846	-36.1	0.138728	-39.7	0.141176	-32.9	0.128342	-34.4	0.134078	-35.9	0.138728	-36.6	0.130435	-39.4	0.118227		-39.2	0.087912	-39.9	0.1	-34.9	0.142857	-35.5	0.139535	-39.4	0.123077		-36.6	0.119403	-37.8	0.086331	-38.4	0.080268		-34.3	13	0.736196	-36	2	0.994413
-31.8	0.138889	-33.1	0.153374	-34.1	0.146199	-34.5	0.160256	-36.1	0.144509	-39.7	0.147059	-33	0.13369	-34.4	0.139665	-35.9	0.144509	-36.6	0.13587	-39.4	0.123153		-39.2	0.091575	-39.9	0.104167	-34.9	0.14881	-35.5	0.145349	-39.5	0.128205		-36.6	0.124378	-37.9	0.089928	-38.5	0.083612		-34.4	10	0.797546	-36.4	1	1
-31.9	0.144444	-33.1	0.159509	-34.1	0.152047	-34.6	0.166667	-36.1	0.150289	-39.7	0.152941	-33	0.139037	-34.4	0.145251	-35.9	0.150289	-36.7	0.141304	-39.4	0.128079		-39.2	0.095238	-39.9	0.108333	-34.9	0.154762	-35.5	0.151163	-39.5	0.133333		-36.6	0.129353	-37.9	0.093525	-38.6	0.086957		-34.5	20	0.920245
-31.9	0.15	-33.2	0.165644	-34.1	0.157895	-34.6	0.173077	-36.2	0.156069	-39.7	0.158824	-33	0.144385	-34.5	0.150838	-36	0.156069	-36.7	0.146739	-39.4	0.133005		-39.3	0.098901	-40	0.1125	-34.9	0.160714	-35.5	0.156977	-39.6	0.138462		-37	0.134328	-37.9	0.097122	-38.8	0.090301		-34.6	8	0.969325
-31.9	0.155556	-33.2	0.171779	-34.1	0.163743	-34.7	0.179487	-36.3	0.16185	-39.7	0.164706	-33	0.149733	-34.5	0.156425	-36	0.16185	-36.7	0.152174	-39.5	0.137931		-39.4	0.102564	-40	0.116667	-35	0.166667	-35.5	0.162791	-39.6	0.14359		-37	0.139303	-38	0.100719	-38.8	0.093645		-34.7	3	0.98773
-31.9	0.161111	-33.2	0.177914	-34.1	0.169591	-34.7	0.185897	-36.3	0.16763	-39.7	0.170588	-33	0.15508	-34.5	0.162011	-36	0.16763	-36.7	0.157609	-39.5	0.142857		-39.4	0.106227	-40	0.120833	-35	0.172619	-35.6	0.168605	-39.6	0.148718		-37.1	0.144279	-38.2	0.104317	-38.8	0.09699		-34.8	2	1
-31.9	0.166667	-33.2	0.184049	-34.1	0.175439	-34.7	0.192308	-36.3	0.17341	-39.7	0.176471	-33	0.160428	-34.5	0.167598	-36.1	0.17341	-36.8	0.163043	-39.5	0.147783		-39.4	0.10989	-40	0.125	-35	0.178571	-35.6	0.174419	-39.6	0.153846		-37.1	0.149254	-38.3	0.107914	-38.9	0.100334
-32	0.172222	-33.3	0.190184	-34.1	0.181287	-34.8	0.198718	-36.4	0.179191	-39.7	0.182353	-33	0.165775	-34.5	0.173184	-36.1	0.179191	-36.8	0.168478	-39.5	0.152709		-39.4	0.113553	-40	0.129167	-35	0.184524	-35.6	0.180233	-39.8	0.158974		-37.1	0.154229	-38.3	0.111511	-38.9	0.103679
-32	0.177778	-33.3	0.196319	-34.2	0.187135	-34.8	0.205128	-36.4	0.184971	-39.7	0.188235	-33.1	0.171123	-34.5	0.178771	-36.1	0.184971	-36.8	0.173913	-39.5	0.157635		-39.4	0.117216	-40	0.133333	-35	0.190476	-35.6	0.186047	-39.8	0.164103		-37.2	0.159204	-38.3	0.115108	-38.9	0.107023
-32	0.183333	-33.3	0.202454	-34.3	0.192982	-34.8	0.211538	-36.5	0.190751	-39.8	0.194118	-33.1	0.176471	-34.5	0.184358	-36.1	0.190751	-36.8	0.179348	-39.5	0.162562		-39.4	0.120879	-40	0.1375	-35.1	0.196429	-35.6	0.19186	-39.8	0.169231		-37.2	0.164179	-38.3	0.118705	-39	0.110368
-32	0.188889	-33.3	0.208589	-34.3	0.19883	-34.8	0.217949	-36.5	0.196532	-39.8	0.2	-33.1	0.181818	-34.5	0.189944	-36.1	0.196532	-36.9	0.184783	-39.6	0.167488		-39.4	0.124542	-40.1	0.141667	-35.1	0.202381	-35.6	0.197674	-39.8	0.174359		-37.3	0.169154	-38.3	0.122302	-39	0.113712
-32.1	0.194444	-33.3	0.214724	-34.3	0.204678	-34.8	0.224359	-36.5	0.202312	-39.8	0.205882	-33.1	0.187166	-34.5	0.195531	-36.1	0.202312	-36.9	0.190217	-39.6	0.172414		-39.4	0.128205	-40.1	0.145833	-35.1	0.208333	-35.6	0.203488	-39.9	0.179487		-37.4	0.174129	-38.3	0.125899	-39	0.117057
-32.1	0.2	-33.4	0.220859	-34.3	0.210526	-34.8	0.230769	-36.5	0.208092	-39.8	0.211765	-33.1	0.192513	-34.5	0.201117	-36.1	0.208092	-36.9	0.195652	-39.6	0.17734		-39.4	0.131868	-40.1	0.15	-35.1	0.214286	-35.6	0.209302	-39.9	0.184615		-37.5	0.179104	-38.4	0.129496	-39	0.120401
-32.1	0.205556	-33.4	0.226994	-34.3	0.216374	-34.8	0.237179	-36.5	0.213873	-39.8	0.217647	-33.1	0.197861	-34.5	0.206704	-36.2	0.213873	-36.9	0.201087	-39.6	0.182266		-39.4	0.135531	-40.1	0.154167	-35.2	0.220238	-35.6	0.215116	-39.9	0.189744		-37.6	0.18408	-38.4	0.133094	-39.1	0.123746
-32.1	0.211111	-33.4	0.233129	-34.3	0.222222	-34.8	0.24359	-36.5	0.219653	-39.8	0.223529	-33.1	0.203209	-34.5	0.212291	-36.3	0.219653	-36.9	0.206522	-39.7	0.187192		-39.4	0.139194	-40.2	0.158333	-35.3	0.22619	-35.6	0.22093	-40	0.194872		-37.6	0.189055	-38.6	0.136691	-39.1	0.12709
-32.2	0.216667	-33.5	0.239264	-34.3	0.22807	-34.9	0.25	-36.6	0.225434	-39.8	0.229412	-33.1	0.208556	-34.5	0.217877	-36.3	0.225434	-37	0.211957	-39.7	0.192118		-39.5	0.142857	-40.2	0.1625	-35.3	0.232143	-35.7	0.226744	-40	0.2		-37.7	0.19403	-38.6	0.140288	-39.1	0.130435
-32.2	0.222222	-33.5	0.245399	-34.3	0.233918	-34.9	0.25641	-36.6	0.231214	-39.8	0.235294	-33.2	0.213904	-34.5	0.223464	-36.3	0.231214	-37	0.217391	-39.7	0.197044		-39.5	0.14652	-40.2	0.166667	-35.3	0.238095	-35.7	0.232558	-40	0.205128		-37.8	0.199005	-38.6	0.143885	-39.1	0.133779
-32.2	0.227778	-33.5	0.251534	-34.3	0.239766	-34.9	0.262821	-36.7	0.236994	-39.8	0.241176	-33.2	0.219251	-34.5	0.22905	-36.3	0.236994	-37	0.222826	-39.7	0.20197		-39.5	0.150183	-40.2	0.170833	-35.4	0.244048	-35.7	0.238372	-40	0.210256		-37.9	0.20398	-38.6	0.147482	-39.2	0.137124
-32.2	0.233333	-33.5	0.257669	-34.4	0.245614	-34.9	0.269231	-36.7	0.242775	-39.8	0.247059	-33.2	0.224599	-34.5	0.234637	-36.3	0.242775	-37	0.228261	-39.7	0.206897		-39.5	0.153846	-40.2	0.175	-35.4	0.25	-35.7	0.244186	-40	0.215385		-38	0.208955	-38.6	0.151079	-39.2	0.140468
-32.2	0.238889	-33.5	0.263804	-34.4	0.251462	-35	0.275641	-36.8	0.248555	-39.9	0.252941	-33.3	0.229947	-34.5	0.240223	-36.4	0.248555	-37	0.233696	-39.7	0.211823		-39.5	0.157509	-40.2	0.179167	-35.4	0.255952	-35.7	0.25	-40	0.220513		-38.1	0.21393	-38.6	0.154676	-39.2	0.143813
-32.2	0.244444	-33.5	0.269939	-34.4	0.25731	-35	0.282051	-36.8	0.254335	-39.9	0.258824	-33.3	0.235294	-34.5	0.24581	-36.4	0.254335	-37	0.23913	-39.7	0.216749		-39.5	0.161172	-40.2	0.183333	-35.4	0.261905	-35.7	0.255814	-40.1	0.225641		-38.2	0.218905	-38.7	0.158273	-39.2	0.147157
-32.2	0.25	-33.5	0.276074	-34.4	0.263158	-35	0.288462	-36.8	0.260116	-39.9	0.264706	-33.3	0.240642	-34.5	0.251397	-36.4	0.260116	-37.1	0.244565	-39.7	0.221675		-39.5	0.164835	-40.2	0.1875	-35.4	0.267857	-35.7	0.261628	-40.1	0.230769		-38.3	0.223881	-38.7	0.161871	-39.2	0.150502
-32.3	0.255556	-33.6	0.282209	-34.4	0.269006	-35	0.294872	-36.8	0.265896	-39.9	0.270588	-33.3	0.245989	-34.5	0.256983	-36.4	0.265896	-37.1	0.25	-39.8	0.226601		-39.5	0.168498	-40.3	0.191667	-35.4	0.27381	-35.7	0.267442	-40.1	0.235897		-38.3	0.228856	-38.7	0.165468	-39.3	0.153846
-32.3	0.261111	-33.6	0.288344	-34.4	0.274854	-35	0.301282	-36.8	0.271676	-39.9	0.276471	-33.3	0.251337	-34.6	0.26257	-36.4	0.271676	-37.1	0.255435	-39.8	0.231527		-39.6	0.172161	-40.3	0.195833	-35.4	0.279762	-35.7	0.273256	-40.1	0.241026		-38.3	0.233831	-38.7	0.169065	-39.3	0.157191
-32.3	0.266667	-33.6	0.294479	-34.4	0.280702	-35	0.307692	-36.8	0.277457	-39.9	0.282353	-33.3	0.256684	-34.6	0.268156	-36.4	0.277457	-37.1	0.26087	-39.8	0.236453		-39.6	0.175824	-40.3	0.2	-35.4	0.285714	-35.7	0.27907	-40.1	0.246154		-38.3	0.238806	-38.7	0.172662	-39.3	0.160535
-32.3	0.272222	-33.6	0.300613	-34.5	0.28655	-35	0.314103	-36.8	0.283237	-39.9	0.288235	-33.3	0.262032	-34.6	0.273743	-36.5	0.283237	-37.2	0.266304	-39.8	0.241379		-39.6	0.179487	-40.3	0.204167	-35.4	0.291667	-35.7	0.284884	-40.1	0.251282		-38.5	0.243781	-38.7	0.176259	-39.3	0.16388
-32.3	0.277778	-33.6	0.306748	-34.5	0.292398	-35	0.320513	-36.8	0.289017	-39.9	0.294118	-33.3	0.26738	-34.6	0.27933	-36.5	0.289017	-37.2	0.271739	-39.8	0.246305		-39.6	0.18315	-40.3	0.208333	-35.5	0.297619	-35.7	0.290698	-40.2	0.25641		-38.7	0.248756	-38.7	0.179856	-39.3	0.167224
-32.4	0.283333	-33.6	0.312883	-34.5	0.298246	-35	0.326923	-36.9	0.294798	-39.9	0.3	-33.3	0.272727	-34.6	0.284916	-36.5	0.294798	-37.2	0.277174	-39.8	0.251232		-39.6	0.186813	-40.3	0.2125	-35.5	0.303571	-35.7	0.296512	-40.2	0.261538		-38.7	0.253731	-38.7	0.183453	-39.3	0.170569
-32.4	0.288889	-33.6	0.319018	-34.5	0.304094	-35	0.333333	-36.9	0.300578	-39.9	0.305882	-33.4	0.278075	-34.6	0.290503	-36.5	0.300578	-37.2	0.282609	-39.8	0.256158		-39.6	0.190476	-40.3	0.216667	-35.5	0.309524	-35.7	0.302326	-40.2	0.266667		-38.7	0.258706	-38.7	0.18705	-39.4	0.173913
-32.4	0.294444	-33.6	0.325153	-34.5	0.309942	-35	0.339744	-36.9	0.306358	-39.9	0.311765	-33.4	0.283422	-34.6	0.296089	-36.6	0.306358	-37.2	0.288043	-39.8	0.261084		-39.6	0.194139	-40.3	0.220833	-35.5	0.315476	-35.7	0.30814	-40.2	0.271795		-38.7	0.263682	-38.7	0.190647	-39.4	0.177258
-32.4	0.3	-33.7	0.331288	-34.5	0.315789	-35.1	0.346154	-36.9	0.312139	-39.9	0.317647	-33.4	0.28877	-34.6	0.301676	-36.6	0.312139	-37.2	0.293478	-39.8	0.26601		-39.7	0.197802	-40.3	0.225	-35.5	0.321429	-35.7	0.313953	-40.2	0.276923		-38.9	0.268657	-38.8	0.194245	-39.4	0.180602
-32.4	0.305556	-33.7	0.337423	-34.5	0.321637	-35.1	0.352564	-36.9	0.317919	-39.9	0.323529	-33.4	0.294118	-34.6	0.307263	-36.6	0.317919	-37.2	0.298913	-39.8	0.270936		-39.7	0.201465	-40.3	0.229167	-35.6	0.327381	-35.7	0.319767	-40.2	0.282051		-38.9	0.273632	-38.8	0.197842	-39.4	0.183946
-32.5	0.311111	-33.7	0.343558	-34.5	0.327485	-35.1	0.358974	-36.9	0.323699	-39.9	0.329412	-33.4	0.299465	-34.7	0.312849	-36.6	0.323699	-37.2	0.304348	-39.8	0.275862		-39.7	0.205128	-40.3	0.233333	-35.6	0.333333	-35.7	0.325581	-40.2	0.287179		-38.9	0.278607	-38.8	0.201439	-39.4	0.187291
-32.5	0.316667	-33.7	0.349693	-34.5	0.333333	-35.1	0.365385	-36.9	0.32948	-39.9	0.335294	-33.4	0.304813	-34.7	0.318436	-36.6	0.32948	-37.2	0.309783	-39.8	0.280788		-39.7	0.208791	-40.3	0.2375	-35.6	0.339286	-35.8	0.331395	-40.2	0.292308		-39	0.283582	-38.8	0.205036	-39.4	0.190635
-32.5	0.322222	-33.7	0.355828	-34.5	0.339181	-35.1	0.371795	-37	0.33526	-39.9	0.341176	-33.4	0.31016	-34.7	0.324022	-36.6	0.33526	-37.3	0.315217	-39.9	0.285714		-39.7	0.212454	-40.4	0.241667	-35.6	0.345238	-35.8	0.337209	-40.2	0.297436		-39	0.288557	-38.8	0.208633	-39.4	0.19398
-32.5	0.327778	-33.8	0.361963	-34.5	0.345029	-35.1	0.378205	-37	0.34104	-39.9	0.347059	-33.4	0.315508	-34.7	0.329609	-36.6	0.34104	-37.3	0.320652	-39.9	0.29064		-39.7	0.216117	-40.4	0.245833	-35.6	0.35119	-35.8	0.343023	-40.3	0.302564		-39	0.293532	-38.8	0.21223	-39.4	0.197324
-32.6	0.333333	-33.8	0.368098	-34.5	0.350877	-35.1	0.384615	-37	0.346821	-39.9	0.352941	-33.4	0.320856	-34.7	0.335196	-36.6	0.346821	-37.3	0.326087	-39.9	0.295567		-39.7	0.21978	-40.4	0.25	-35.6	0.357143	-35.8	0.348837	-40.3	0.307692		-39	0.298507	-38.8	0.215827	-39.4	0.200669
-32.6	0.338889	-33.8	0.374233	-34.5	0.356725	-35.1	0.391026	-37	0.352601	-39.9	0.358824	-33.4	0.326203	-34.7	0.340782	-36.6	0.352601	-37.3	0.331522	-39.9	0.300493		-39.7	0.223443	-40.4	0.254167	-35.6	0.363095	-35.8	0.354651	-40.3	0.312821		-39.1	0.303483	-38.8	0.219424	-39.4	0.204013
-32.6	0.344444	-33.8	0.380368	-34.5	0.362573	-35.1	0.397436	-37.1	0.358382	-40	0.364706	-33.4	0.331551	-34.7	0.346369	-36.6	0.358382	-37.3	0.336957	-39.9	0.305419		-39.7	0.227106	-40.4	0.258333	-35.6	0.369048	-35.8	0.360465	-40.3	0.317949		-39.1	0.308458	-38.9	0.223022	-39.4	0.207358
-32.6	0.35	-33.8	0.386503	-34.5	0.368421	-35.2	0.403846	-37.1	0.364162	-40	0.370588	-33.4	0.336898	-34.7	0.351955	-36.7	0.364162	-37.3	0.342391	-39.9	0.310345		-39.7	0.230769	-40.4	0.2625	-35.7	0.375	-35.8	0.366279	-40.3	0.323077		-39.3	0.313433	-38.9	0.226619	-39.4	0.210702
-32.6	0.355556	-33.8	0.392638	-34.5	0.374269	-35.2	0.410256	-37.1	0.369942	-40	0.376471	-33.4	0.342246	-34.7	0.357542	-36.7	0.369942	-37.3	0.347826	-39.9	0.315271		-39.7	0.234432	-40.4	0.266667	-35.7	0.380952	-35.8	0.372093	-40.4	0.328205		-39.3	0.318408	-38.9	0.230216	-39.4	0.214047
-32.6	0.361111	-33.8	0.398773	-34.5	0.380117	-35.2	0.416667	-37.1	0.375723	-40	0.382353	-33.4	0.347594	-34.7	0.363128	-36.7	0.375723	-37.3	0.353261	-39.9	0.320197		-39.7	0.238095	-40.4	0.270833	-35.7	0.386905	-35.8	0.377907	-40.4	0.333333		-39.3	0.323383	-38.9	0.233813	-39.4	0.217391
-32.6	0.366667	-33.8	0.404908	-34.5	0.385965	-35.2	0.423077	-37.1	0.381503	-40	0.388235	-33.5	0.352941	-34.7	0.368715	-36.7	0.381503	-37.4	0.358696	-39.9	0.325123		-39.7	0.241758	-40.4	0.275	-35.7	0.392857	-35.8	0.383721	-40.4	0.338462		-39.3	0.328358	-38.9	0.23741	-39.4	0.220736
-32.6	0.372222	-33.9	0.411043	-34.5	0.391813	-35.2	0.429487	-37.1	0.387283	-40	0.394118	-33.5	0.358289	-34.7	0.374302	-36.7	0.387283	-37.4	0.36413	-39.9	0.330049		-39.7	0.245421	-40.4	0.279167	-35.7	0.39881	-35.8	0.389535	-40.4	0.34359		-39.3	0.333333	-38.9	0.241007	-39.4	0.22408
-32.6	0.377778	-33.9	0.417178	-34.5	0.397661	-35.2	0.435897	-37.1	0.393064	-40	0.4	-33.5	0.363636	-34.8	0.379888	-36.7	0.393064	-37.4	0.369565	-39.9	0.334975		-39.7	0.249084	-40.4	0.283333	-35.7	0.404762	-35.8	0.395349	-40.4	0.348718		-39.4	0.338308	-38.9	0.244604	-39.4	0.227425
-32.7	0.383333	-33.9	0.423313	-34.5	0.403509	-35.2	0.442308	-37.1	0.398844	-40	0.405882	-33.5	0.368984	-34.8	0.385475	-36.8	0.398844	-37.4	0.375	-39.9	0.339901		-39.7	0.252747	-40.4	0.2875	-35.7	0.410714	-35.8	0.401163	-40.4	0.353846		-39.4	0.343284	-39	0.248201	-39.4	0.230769
-32.7	0.388889	-33.9	0.429448	-34.5	0.409357	-35.2	0.448718	-37.1	0.404624	-40	0.411765	-33.5	0.374332	-34.8	0.391061	-36.8	0.404624	-37.4	0.380435	-39.9	0.344828		-39.7	0.25641	-40.4	0.291667	-35.7	0.416667	-35.8	0.406977	-40.4	0.358974		-39.4	0.348259	-39	0.251799	-39.4	0.234114
-32.7	0.394444	-33.9	0.435583	-34.5	0.415205	-35.2	0.455128	-37.1	0.410405	-40	0.417647	-33.5	0.379679	-34.8	0.396648	-36.8	0.410405	-37.4	0.38587	-40	0.349754		-39.8	0.260073	-40.4	0.295833	-35.7	0.422619	-35.8	0.412791	-40.4	0.364103		-39.4	0.353234	-39	0.255396	-39.4	0.237458
-32.7	0.4	-34	0.441718	-34.5	0.421053	-35.2	0.461538	-37.1	0.416185	-40	0.423529	-33.5	0.385027	-34.8	0.402235	-36.8	0.416185	-37.4	0.391304	-40	0.35468		-39.8	0.263736	-40.4	0.3	-35.7	0.428571	-35.9	0.418605	-40.5	0.369231		-39.4	0.358209	-39.1	0.258993	-39.4	0.240803
-32.7	0.405556	-34	0.447853	-34.5	0.426901	-35.2	0.467949	-37.1	0.421965	-40	0.429412	-33.5	0.390374	-34.8	0.407821	-36.8	0.421965	-37.4	0.396739	-40	0.359606		-39.8	0.267399	-40.5	0.304167	-35.7	0.434524	-35.9	0.424419	-40.5	0.374359		-39.4	0.363184	-39.1	0.26259	-39.4	0.244147
-32.7	0.411111	-34	0.453988	-34.5	0.432749	-35.3	0.474359	-37.1	0.427746	-40	0.435294	-33.5	0.395722	-34.8	0.413408	-36.8	0.427746	-37.4	0.402174	-40	0.364532		-39.8	0.271062	-40.5	0.308333	-35.7	0.440476	-35.9	0.430233	-40.5	0.379487		-39.4	0.368159	-39.1	0.266187	-39.4	0.247492
-32.7	0.416667	-34	0.460123	-34.6	0.438596	-35.3	0.480769	-37.2	0.433526	-40	0.441176	-33.5	0.40107	-34.8	0.418994	-36.8	0.433526	-37.4	0.407609	-40	0.369458		-39.8	0.274725	-40.5	0.3125	-35.7	0.446429	-35.9	0.436047	-40.5	0.384615		-39.4	0.373134	-39.1	0.269784	-39.4	0.250836
-32.7	0.422222	-34	0.466258	-34.6	0.444444	-35.3	0.487179	-37.2	0.439306	-40	0.447059	-33.5	0.406417	-34.8	0.424581	-36.8	0.439306	-37.4	0.413043	-40	0.374384		-39.8	0.278388	-40.5	0.316667	-35.7	0.452381	-35.9	0.44186	-40.5	0.389744		-39.5	0.378109	-39.1	0.273381	-39.4	0.254181
-32.7	0.427778	-34	0.472393	-34.6	0.450292	-35.3	0.49359	-37.2	0.445087	-40	0.452941	-33.5	0.411765	-34.8	0.430168	-36.9	0.445087	-37.4	0.418478	-40	0.37931		-39.8	0.282051	-40.5	0.320833	-35.7	0.458333	-35.9	0.447674	-40.5	0.394872		-39.5	0.383085	-39.1	0.276978	-39.4	0.257525
-32.7	0.433333	-34	0.478528	-34.6	0.45614	-35.3	0.5	-37.2	0.450867	-40	0.458824	-33.5	0.417112	-34.8	0.435754	-36.9	0.450867	-37.4	0.423913	-40	0.384236		-39.8	0.285714	-40.5	0.325	-35.7	0.464286	-35.9	0.453488	-40.5	0.4		-39.5	0.38806	-39.1	0.280576	-39.4	0.26087
-32.8	0.438889	-34	0.484663	-34.6	0.461988	-35.3	0.50641	-37.2	0.456647	-40	0.464706	-33.6	0.42246	-34.8	0.441341	-36.9	0.456647	-37.5	0.429348	-40	0.389163		-39.8	0.289377	-40.6	0.329167	-35.7	0.470238	-35.9	0.459302	-40.5	0.405128		-39.5	0.393035	-39.1	0.284173	-39.4	0.264214
-32.8	0.444444	-34	0.490798	-34.6	0.467836	-35.3	0.512821	-37.2	0.462428	-40	0.470588	-33.6	0.427807	-34.8	0.446927	-36.9	0.462428	-37.5	0.434783	-40	0.394089		-39.8	0.29304	-40.6	0.333333	-35.7	0.47619	-35.9	0.465116	-40.5	0.410256		-39.5	0.39801	-39.1	0.28777	-39.4	0.267559
-32.8	0.45	-34.1	0.496933	-34.7	0.473684	-35.3	0.519231	-37.2	0.468208	-40	0.476471	-33.6	0.433155	-34.8	0.452514	-36.9	0.468208	-37.5	0.440217	-40	0.399015		-39.8	0.296703	-40.6	0.3375	-35.7	0.482143	-35.9	0.47093	-40.5	0.415385		-39.6	0.402985	-39.1	0.291367	-39.4	0.270903
-32.8	0.455556	-34.1	0.503067	-34.7	0.479532	-35.3	0.525641	-37.2	0.473988	-40.1	0.482353	-33.6	0.438503	-34.9	0.458101	-36.9	0.473988	-37.5	0.445652	-40	0.403941		-39.8	0.300366	-40.6	0.341667	-35.7	0.488095	-35.9	0.476744	-40.5	0.420513		-39.6	0.40796	-39.1	0.294964	-39.5	0.274247
-32.8	0.461111	-34.1	0.509202	-34.7	0.48538	-35.3	0.532051	-37.2	0.479769	-40.1	0.488235	-33.6	0.44385	-34.9	0.463687	-37	0.479769	-37.5	0.451087	-40	0.408867		-39.9	0.304029	-40.6	0.345833	-35.7	0.494048	-35.9	0.482558	-40.5	0.425641		-39.6	0.412935	-39.1	0.298561	-39.5	0.277592
-32.8	0.466667	-34.1	0.515337	-34.7	0.491228	-35.3	0.538462	-37.2	0.485549	-40.1	0.494118	-33.6	0.449198	-34.9	0.469274	-37	0.485549	-37.5	0.456522	-40	0.413793		-39.9	0.307692	-40.6	0.35	-35.7	0.5	-35.9	0.488372	-40.5	0.430769		-39.6	0.41791	-39.1	0.302158	-39.5	0.280936
-32.9	0.472222	-34.1	0.521472	-34.7	0.497076	-35.3	0.544872	-37.2	0.491329	-40.1	0.5	-33.6	0.454545	-34.9	0.47486	-37	0.491329	-37.5	0.461957	-40	0.418719		-39.9	0.311355	-40.6	0.354167	-35.7	0.505952	-36	0.494186	-40.6	0.435897		-39.6	0.422886	-39.1	0.305755	-39.5	0.284281
-32.9	0.477778	-34.1	0.527607	-34.7	0.502924	-35.3	0.551282	-37.2	0.49711	-40.1	0.505882	-33.6	0.459893	-34.9	0.480447	-37	0.49711	-37.5	0.467391	-40	0.423645		-39.9	0.315018	-40.6	0.358333	-35.7	0.511905	-36	0.5	-40.6	0.441026		-39.7	0.427861	-39.1	0.309353	-39.5	0.287625
-32.9	0.483333	-34.1	0.533742	-34.7	0.508772	-35.3	0.557692	-37.3	0.50289	-40.1	0.511765	-33.6	0.465241	-34.9	0.486034	-37	0.50289	-37.5	0.472826	-40	0.428571		-39.9	0.318681	-40.6	0.3625	-35.7	0.517857	-36	0.505814	-40.6	0.446154		-39.7	0.432836	-39.1	0.31295	-39.5	0.29097
-32.9	0.488889	-34.1	0.539877	-34.7	0.51462	-35.3	0.564103	-37.3	0.508671	-40.1	0.517647	-33.6	0.470588	-34.9	0.49162	-37	0.508671	-37.5	0.478261	-40	0.433498		-39.9	0.322344	-40.6	0.366667	-35.7	0.52381	-36	0.511628	-40.6	0.451282		-39.7	0.437811	-39.2	0.316547	-39.5	0.294314
-32.9	0.494444	-34.1	0.546012	-34.7	0.520468	-35.4	0.570513	-37.3	0.514451	-40.1	0.523529	-33.6	0.475936	-34.9	0.497207	-37	0.514451	-37.5	0.483696	-40	0.438424		-39.9	0.326007	-40.6	0.370833	-35.7	0.529762	-36	0.517442	-40.6	0.45641		-39.7	0.442786	-39.2	0.320144	-39.5	0.297659
-32.9	0.5	-34.1	0.552147	-34.7	0.526316	-35.4	0.576923	-37.3	0.520231	-40.1	0.529412	-33.6	0.481283	-34.9	0.502793	-37	0.520231	-37.5	0.48913	-40	0.44335		-39.9	0.32967	-40.6	0.375	-35.7	0.535714	-36	0.523256	-40.6	0.461538		-39.7	0.447761	-39.2	0.323741	-39.5	0.301003
-32.9	0.505556	-34.1	0.558282	-34.7	0.532164	-35.4	0.583333	-37.3	0.526012	-40.1	0.535294	-33.6	0.486631	-34.9	0.50838	-37	0.526012	-37.5	0.494565	-40	0.448276		-39.9	0.333333	-40.6	0.379167	-35.8	0.541667	-36	0.52907	-40.6	0.466667		-39.7	0.452736	-39.2	0.327338	-39.5	0.304348
-32.9	0.511111	-34.2	0.564417	-34.7	0.538012	-35.4	0.589744	-37.3	0.531792	-40.1	0.541176	-33.6	0.491979	-34.9	0.513966	-37	0.531792	-37.5	0.5	-40.1	0.453202		-39.9	0.336996	-40.6	0.383333	-35.8	0.547619	-36	0.534884	-40.6	0.471795		-39.7	0.457711	-39.2	0.330935	-39.5	0.307692
-32.9	0.516667	-34.2	0.570552	-34.7	0.54386	-35.4	0.596154	-37.3	0.537572	-40.1	0.547059	-33.7	0.497326	-34.9	0.519553	-37	0.537572	-37.5	0.505435	-40.1	0.458128		-39.9	0.340659	-40.6	0.3875	-35.8	0.553571	-36	0.540698	-40.6	0.476923		-39.8	0.462687	-39.2	0.334532	-39.5	0.311037
-33	0.522222	-34.2	0.576687	-34.7	0.549708	-35.4	0.602564	-37.3	0.543353	-40.1	0.552941	-33.7	0.502674	-34.9	0.52514	-37	0.543353	-37.5	0.51087	-40.1	0.463054		-39.9	0.344322	-40.6	0.391667	-35.8	0.559524	-36	0.546512	-40.6	0.482051		-39.8	0.467662	-39.2	0.338129	-39.5	0.314381
-33	0.527778	-34.2	0.582822	-34.7	0.555556	-35.5	0.608974	-37.3	0.549133	-40.1	0.558824	-33.7	0.508021	-34.9	0.530726	-37	0.549133	-37.6	0.516304	-40.1	0.46798		-39.9	0.347985	-40.6	0.395833	-35.8	0.565476	-36	0.552326	-40.6	0.487179		-39.8	0.472637	-39.2	0.341727	-39.5	0.317726
-33	0.533333	-34.2	0.588957	-34.7	0.561404	-35.5	0.615385	-37.4	0.554913	-40.1	0.564706	-33.7	0.513369	-34.9	0.536313	-37	0.554913	-37.6	0.521739	-40.1	0.472906		-39.9	0.351648	-40.6	0.4	-35.8	0.571429	-36	0.55814	-40.6	0.492308		-39.8	0.477612	-39.2	0.345324	-39.5	0.32107
-33	0.538889	-34.2	0.595092	-34.7	0.567251	-35.5	0.621795	-37.4	0.560694	-40.1	0.570588	-33.7	0.518717	-34.9	0.541899	-37.1	0.560694	-37.6	0.527174	-40.1	0.477833		-39.9	0.355311	-40.6	0.404167	-35.8	0.577381	-36	0.563953	-40.6	0.497436		-39.8	0.482587	-39.2	0.348921	-39.5	0.324415
-33	0.544444	-34.2	0.601227	-34.7	0.573099	-35.5	0.628205	-37.4	0.566474	-40.2	0.576471	-33.7	0.524064	-34.9	0.547486	-37.1	0.566474	-37.6	0.532609	-40.1	0.482759		-39.9	0.358974	-40.6	0.408333	-35.8	0.583333	-36	0.569767	-40.6	0.502564		-39.8	0.487562	-39.2	0.352518	-39.5	0.327759
-33	0.55	-34.2	0.607362	-34.7	0.578947	-35.5	0.634615	-37.4	0.572254	-40.2	0.582353	-33.7	0.529412	-35	0.553073	-37.1	0.572254	-37.6	0.538043	-40.1	0.487685		-39.9	0.362637	-40.6	0.4125	-35.8	0.589286	-36	0.575581	-40.6	0.507692		-39.8	0.492537	-39.3	0.356115	-39.5	0.331104
-33	0.555556	-34.2	0.613497	-34.7	0.584795	-35.5	0.641026	-37.4	0.578035	-40.2	0.588235	-33.7	0.534759	-35	0.558659	-37.1	0.578035	-37.6	0.543478	-40.1	0.492611		-39.9	0.3663	-40.6	0.416667	-35.8	0.595238	-36	0.581395	-40.6	0.512821		-39.8	0.497512	-39.3	0.359712	-39.5	0.334448
-33	0.561111	-34.2	0.619632	-34.7	0.590643	-35.5	0.647436	-37.4	0.583815	-40.2	0.594118	-33.7	0.540107	-35	0.564246	-37.1	0.583815	-37.6	0.548913	-40.1	0.497537		-39.9	0.369963	-40.6	0.420833	-35.8	0.60119	-36	0.587209	-40.6	0.517949		-39.8	0.502488	-39.3	0.363309	-39.5	0.337793
-33	0.566667	-34.2	0.625767	-34.7	0.596491	-35.5	0.653846	-37.4	0.589595	-40.2	0.6	-33.7	0.545455	-35	0.569832	-37.1	0.589595	-37.6	0.554348	-40.1	0.502463		-39.9	0.373626	-40.6	0.425	-35.8	0.607143	-36	0.593023	-40.6	0.523077		-39.8	0.507463	-39.3	0.366906	-39.6	0.341137
-33	0.572222	-34.2	0.631902	-34.7	0.602339	-35.6	0.660256	-37.4	0.595376	-40.2	0.605882	-33.7	0.550802	-35	0.575419	-37.1	0.595376	-37.6	0.559783	-40.1	0.507389		-39.9	0.377289	-40.6	0.429167	-35.8	0.613095	-36	0.598837	-40.6	0.528205		-39.8	0.512438	-39.3	0.370504	-39.6	0.344482
-33.1	0.577778	-34.2	0.638037	-34.8	0.608187	-35.6	0.666667	-37.4	0.601156	-40.2	0.611765	-33.7	0.55615	-35	0.581006	-37.1	0.601156	-37.7	0.565217	-40.1	0.512315		-39.9	0.380952	-40.6	0.433333	-35.8	0.619048	-36	0.604651	-40.6	0.533333		-39.8	0.517413	-39.3	0.374101	-39.6	0.347826
-33.1	0.583333	-34.2	0.644172	-34.8	0.614035	-35.7	0.673077	-37.4	0.606936	-40.2	0.617647	-33.7	0.561497	-35.1	0.586592	-37.1	0.606936	-37.7	0.570652	-40.1	0.517241		-39.9	0.384615	-40.6	0.4375	-35.8	0.625	-36.1	0.610465	-40.7	0.538462		-39.8	0.522388	-39.3	0.377698	-39.6	0.351171
-33.1	0.588889	-34.2	0.650307	-34.8	0.619883	-35.7	0.679487	-37.4	0.612717	-40.2	0.623529	-33.7	0.566845	-35.1	0.592179	-37.1	0.612717	-37.7	0.576087	-40.1	0.522167		-39.9	0.388278	-40.6	0.441667	-35.9	0.630952	-36.1	0.616279	-40.7	0.54359		-39.8	0.527363	-39.3	0.381295	-39.6	0.354515
-33.1	0.594444	-34.2	0.656442	-34.8	0.625731	-35.7	0.685897	-37.4	0.618497	-40.2	0.629412	-33.8	0.572193	-35.1	0.597765	-37.1	0.618497	-37.7	0.581522	-40.1	0.527094		-39.9	0.391941	-40.7	0.445833	-35.9	0.636905	-36.1	0.622093	-40.7	0.548718		-39.8	0.532338	-39.4	0.384892	-39.6	0.35786
-33.1	0.6	-34.3	0.662577	-34.8	0.631579	-35.7	0.692308	-37.4	0.624277	-40.2	0.635294	-33.8	0.57754	-35.1	0.603352	-37.1	0.624277	-37.7	0.586957	-40.1	0.53202		-39.9	0.395604	-40.7	0.45	-35.9	0.642857	-36.1	0.627907	-40.7	0.553846		-39.8	0.537313	-39.4	0.388489	-39.6	0.361204
-33.1	0.605556	-34.3	0.668712	-34.8	0.637427	-35.7	0.698718	-37.5	0.630058	-40.2	0.641176	-33.8	0.582888	-35.1	0.608939	-37.1	0.630058	-37.7	0.592391	-40.1	0.536946		-39.9	0.399267	-40.7	0.454167	-35.9	0.64881	-36.1	0.633721	-40.7	0.558974		-39.8	0.542289	-39.4	0.392086	-39.6	0.364548
-33.1	0.611111	-34.3	0.674847	-34.8	0.643275	-35.8	0.705128	-37.5	0.635838	-40.2	0.647059	-33.8	0.588235	-35.1	0.614525	-37.1	0.635838	-37.7	0.597826	-40.2	0.541872		-39.9	0.40293	-40.7	0.458333	-35.9	0.654762	-36.1	0.639535	-40.7	0.564103		-39.9	0.547264	-39.4	0.395683	-39.6	0.367893
-33.2	0.616667	-34.3	0.680982	-34.8	0.649123	-35.9	0.711538	-37.5	0.641618	-40.2	0.652941	-33.8	0.593583	-35.1	0.620112	-37.2	0.641618	-37.7	0.603261	-40.2	0.546798		-39.9	0.406593	-40.7	0.4625	-35.9	0.660714	-36.1	0.645349	-40.7	0.569231		-39.9	0.552239	-39.4	0.399281	-39.6	0.371237
-33.2	0.622222	-34.3	0.687117	-34.8	0.654971	-35.9	0.717949	-37.5	0.647399	-40.2	0.658824	-33.8	0.59893	-35.1	0.625698	-37.2	0.647399	-37.7	0.608696	-40.2	0.551724		-40	0.410256	-40.7	0.466667	-35.9	0.666667	-36.1	0.651163	-40.7	0.574359		-39.9	0.557214	-39.4	0.402878	-39.6	0.374582
-33.2	0.627778	-34.3	0.693252	-34.8	0.660819	-35.9	0.724359	-37.5	0.653179	-40.2	0.664706	-33.8	0.604278	-35.1	0.631285	-37.2	0.653179	-37.7	0.61413	-40.2	0.55665		-40	0.413919	-40.7	0.470833	-35.9	0.672619	-36.1	0.656977	-40.7	0.579487		-39.9	0.562189	-39.4	0.406475	-39.6	0.377926
-33.2	0.633333	-34.3	0.699387	-34.9	0.666667	-36	0.730769	-37.5	0.65896	-40.2	0.670588	-33.8	0.609626	-35.1	0.636872	-37.2	0.65896	-37.7	0.619565	-40.2	0.561576		-40	0.417582	-40.7	0.475	-35.9	0.678571	-36.1	0.662791	-40.7	0.584615		-39.9	0.567164	-39.4	0.410072	-39.6	0.381271
-33.2	0.638889	-34.3	0.705521	-34.9	0.672515	-36	0.737179	-37.5	0.66474	-40.2	0.676471	-33.8	0.614973	-35.1	0.642458	-37.2	0.66474	-37.8	0.625	-40.2	0.566502		-40	0.421245	-40.7	0.479167	-35.9	0.684524	-36.1	0.668605	-40.7	0.589744		-39.9	0.572139	-39.4	0.413669	-39.6	0.384615
-33.2	0.644444	-34.3	0.711656	-34.9	0.678363	-36.1	0.74359	-37.5	0.67052	-40.2	0.682353	-33.8	0.620321	-35.1	0.648045	-37.2	0.67052	-37.8	0.630435	-40.2	0.571429		-40	0.424908	-40.7	0.483333	-35.9	0.690476	-36.1	0.674419	-40.7	0.594872		-39.9	0.577114	-39.4	0.417266	-39.6	0.38796
-33.2	0.65	-34.3	0.717791	-34.9	0.684211	-36.1	0.75	-37.5	0.676301	-40.2	0.688235	-33.8	0.625668	-35.1	0.653631	-37.2	0.676301	-37.8	0.63587	-40.2	0.576355		-40	0.428571	-40.7	0.4875	-35.9	0.696429	-36.1	0.680233	-40.7	0.6		-39.9	0.58209	-39.4	0.420863	-39.6	0.391304
-33.2	0.655556	-34.3	0.723926	-34.9	0.690058	-36.1	0.75641	-37.6	0.682081	-40.2	0.694118	-33.8	0.631016	-35.1	0.659218	-37.2	0.682081	-37.8	0.641304	-40.2	0.581281		-40	0.432234	-40.7	0.491667	-35.9	0.702381	-36.1	0.686047	-40.7	0.605128		-39.9	0.587065	-39.4	0.42446	-39.6	0.394649
-33.2	0.661111	-34.3	0.730061	-34.9	0.695906	-36.2	0.762821	-37.6	0.687861	-40.2	0.7	-33.8	0.636364	-35.1	0.664804	-37.2	0.687861	-37.8	0.646739	-40.2	0.586207		-40	0.435897	-40.7	0.495833	-36	0.708333	-36.1	0.69186	-40.7	0.610256		-39.9	0.59204	-39.4	0.428058	-39.6	0.397993
-33.2	0.666667	-34.3	0.736196	-34.9	0.701754	-36.2	0.769231	-37.6	0.693642	-40.2	0.705882	-33.8	0.641711	-35.1	0.670391	-37.2	0.693642	-37.8	0.652174	-40.2	0.591133		-40	0.43956	-40.7	0.5	-36	0.714286	-36.1	0.697674	-40.7	0.615385		-39.9	0.597015	-39.4	0.431655	-39.6	0.401338
-33.2	0.672222	-34.4	0.742331	-34.9	0.707602	-36.2	0.775641	-37.6	0.699422	-40.2	0.711765	-33.9	0.647059	-35.1	0.675978	-37.2	0.699422	-37.8	0.657609	-40.2	0.596059		-40	0.443223	-40.7	0.504167	-36	0.720238	-36.1	0.703488	-40.7	0.620513		-40	0.60199	-39.4	0.435252	-39.6	0.404682
-33.2	0.677778	-34.4	0.748466	-34.9	0.71345	-36.2	0.782051	-37.6	0.705202	-40.2	0.717647	-33.9	0.652406	-35.1	0.681564	-37.2	0.705202	-37.8	0.663043	-40.2	0.600985		-40	0.446886	-40.7	0.508333	-36	0.72619	-36.1	0.709302	-40.7	0.625641		-40	0.606965	-39.4	0.438849	-39.6	0.408027
-33.2	0.683333	-34.4	0.754601	-34.9	0.719298	-36.2	0.788462	-37.6	0.710983	-40.2	0.723529	-33.9	0.657754	-35.1	0.687151	-37.2	0.710983	-37.9	0.668478	-40.2	0.605911		-40	0.450549	-40.7	0.5125	-36	0.732143	-36.1	0.715116	-40.8	0.630769		-40	0.61194	-39.4	0.442446	-39.6	0.411371
-33.2	0.688889	-34.4	0.760736	-34.9	0.725146	-36.2	0.794872	-37.7	0.716763	-40.2	0.729412	-33.9	0.663102	-35.1	0.692737	-37.2	0.716763	-37.9	0.673913	-40.2	0.610837		-40	0.454212	-40.7	0.516667	-36	0.738095	-36.1	0.72093	-40.8	0.635897		-40	0.616915	-39.4	0.446043	-39.6	0.414716
-33.3	0.694444	-34.4	0.766871	-34.9	0.730994	-36.2	0.801282	-37.7	0.722543	-40.2	0.735294	-33.9	0.668449	-35.1	0.698324	-37.2	0.722543	-37.9	0.679348	-40.2	0.615764		-40	0.457875	-40.7	0.520833	-36	0.744048	-36.2	0.726744	-40.8	0.641026		-40	0.621891	-39.4	0.44964	-39.6	0.41806
-33.3	0.7	-34.4	0.773006	-34.9	0.736842	-36.3	0.807692	-37.7	0.728324	-40.2	0.741176	-33.9	0.673797	-35.1	0.703911	-37.2	0.728324	-37.9	0.684783	-40.2	0.62069		-40	0.461538	-40.7	0.525	-36	0.75	-36.2	0.732558	-40.8	0.646154		-40	0.626866	-39.4	0.453237	-39.7	0.421405
-33.3	0.705556	-34.4	0.779141	-35	0.74269	-36.3	0.814103	-37.7	0.734104	-40.2	0.747059	-33.9	0.679144	-35.1	0.709497	-37.2	0.734104	-37.9	0.690217	-40.2	0.625616		-40	0.465201	-40.7	0.529167	-36	0.755952	-36.2	0.738372	-40.8	0.651282		-40	0.631841	-39.4	0.456835	-39.7	0.424749
-33.3	0.711111	-34.4	0.785276	-35	0.748538	-36.3	0.820513	-37.7	0.739884	-40.2	0.752941	-33.9	0.684492	-35.1	0.715084	-37.2	0.739884	-38	0.695652	-40.2	0.630542		-40	0.468864	-40.7	0.533333	-36	0.761905	-36.2	0.744186	-40.8	0.65641		-40	0.636816	-39.4	0.460432	-39.7	0.428094
-33.3	0.716667	-34.4	0.791411	-35	0.754386	-36.4	0.826923	-37.7	0.745665	-40.2	0.758824	-33.9	0.68984	-35.1	0.72067	-37.2	0.745665	-38	0.701087	-40.2	0.635468		-40	0.472527	-40.7	0.5375	-36	0.767857	-36.2	0.75	-40.8	0.661538		-40	0.641791	-39.4	0.464029	-39.7	0.431438
-33.3	0.722222	-34.4	0.797546	-35	0.760234	-36.4	0.833333	-37.7	0.751445	-40.2	0.764706	-33.9	0.695187	-35.1	0.726257	-37.3	0.751445	-38	0.706522	-40.2	0.640394		-40	0.47619	-40.7	0.541667	-36	0.77381	-36.2	0.755814	-40.8	0.666667		-40	0.646766	-39.4	0.467626	-39.7	0.434783
-33.3	0.727778	-34.5	0.803681	-35	0.766082	-36.4	0.839744	-37.8	0.757225	-40.2	0.770588	-33.9	0.700535	-35.1	0.731844	-37.3	0.757225	-38	0.711957	-40.2	0.64532		-40	0.479853	-40.7	0.545833	-36	0.779762	-36.2	0.761628	-40.8	0.671795		-40	0.651741	-39.4	0.471223	-39.7	0.438127
-33.3	0.733333	-34.5	0.809816	-35	0.77193	-36.4	0.846154	-37.8	0.763006	-40.2	0.776471	-33.9	0.705882	-35.1	0.73743	-37.3	0.763006	-38	0.717391	-40.2	0.650246		-40	0.483516	-40.7	0.55	-36	0.785714	-36.2	0.767442	-40.8	0.676923		-40	0.656716	-39.4	0.47482	-39.7	0.441472
-33.3	0.738889	-34.5	0.815951	-35	0.777778	-36.4	0.852564	-37.8	0.768786	-40.2	0.782353	-33.9	0.71123	-35.2	0.743017	-37.3	0.768786	-38	0.722826	-40.2	0.655172		-40	0.487179	-40.8	0.554167	-36.1	0.791667	-36.2	0.773256	-40.8	0.682051		-40.1	0.661692	-39.4	0.478417	-39.7	0.444816
-33.3	0.744444	-34.5	0.822086	-35	0.783626	-36.5	0.858974	-37.8	0.774566	-40.2	0.788235	-33.9	0.716578	-35.2	0.748603	-37.3	0.774566	-38	0.728261	-40.2	0.660099		-40	0.490842	-40.8	0.558333	-36.1	0.797619	-36.2	0.77907	-40.8	0.687179		-40.1	0.666667	-39.4	0.482014	-39.7	0.448161
-33.3	0.75	-34.5	0.828221	-35.1	0.789474	-36.5	0.865385	-37.8	0.780347	-40.2	0.794118	-33.9	0.721925	-35.2	0.75419	-37.3	0.780347	-38	0.733696	-40.2	0.665025		-40	0.494505	-40.8	0.5625	-36.1	0.803571	-36.2	0.784884	-40.8	0.692308		-40.1	0.671642	-39.4	0.485612	-39.7	0.451505
-33.3	0.755556	-34.5	0.834356	-35.1	0.795322	-36.5	0.871795	-37.8	0.786127	-40.2	0.8	-33.9	0.727273	-35.2	0.759777	-37.3	0.786127	-38	0.73913	-40.2	0.669951		-40	0.498168	-40.8	0.566667	-36.1	0.809524	-36.2	0.790698	-40.8	0.697436		-40.1	0.676617	-39.4	0.489209	-39.7	0.454849
-33.3	0.761111	-34.5	0.840491	-35.1	0.80117	-36.5	0.878205	-37.8	0.791908	-40.2	0.805882	-33.9	0.73262	-35.2	0.765363	-37.4	0.791908	-38	0.744565	-40.2	0.674877		-40	0.501832	-40.8	0.570833	-36.1	0.815476	-36.2	0.796512	-40.8	0.702564		-40.1	0.681592	-39.4	0.492806	-39.7	0.458194
-33.3	0.766667	-34.5	0.846626	-35.1	0.807018	-36.5	0.884615	-37.8	0.797688	-40.2	0.811765	-33.9	0.737968	-35.2	0.77095	-37.4	0.797688	-38	0.75	-40.2	0.679803		-40	0.505495	-40.8	0.575	-36.1	0.821429	-36.3	0.802326	-40.8	0.707692		-40.1	0.686567	-39.4	0.496403	-39.7	0.461538
-33.3	0.772222	-34.5	0.852761	-35.1	0.812865	-36.5	0.891026	-37.8	0.803468	-40.2	0.817647	-33.9	0.743316	-35.2	0.776536	-37.4	0.803468	-38.1	0.755435	-40.2	0.684729		-40	0.509158	-40.8	0.579167	-36.1	0.827381	-36.3	0.80814	-40.8	0.712821		-40.1	0.691542	-39.4	0.5	-39.7	0.464883
-33.3	0.777778	-34.5	0.858896	-35.1	0.818713	-36.5	0.897436	-37.8	0.809249	-40.2	0.823529	-33.9	0.748663	-35.2	0.782123	-37.4	0.809249	-38.1	0.76087	-40.2	0.689655		-40	0.512821	-40.8	0.583333	-36.1	0.833333	-36.3	0.813953	-40.8	0.717949		-40.1	0.696517	-39.4	0.503597	-39.7	0.468227
-33.3	0.783333	-34.5	0.865031	-35.1	0.824561	-36.6	0.903846	-37.9	0.815029	-40.2	0.829412	-33.9	0.754011	-35.2	0.787709	-37.4	0.815029	-38.2	0.766304	-40.2	0.694581		-40	0.516484	-40.8	0.5875	-36.1	0.839286	-36.3	0.819767	-40.8	0.723077		-40.1	0.701493	-39.4	0.507194	-39.7	0.471572
-33.3	0.788889	-34.5	0.871166	-35.1	0.830409	-36.6	0.910256	-37.9	0.820809	-40.2	0.835294	-33.9	0.759358	-35.2	0.793296	-37.4	0.820809	-38.2	0.771739	-40.2	0.699507		-40	0.520147	-40.8	0.591667	-36.1	0.845238	-36.3	0.825581	-40.8	0.728205		-40.1	0.706468	-39.4	0.510791	-39.7	0.474916
-33.4	0.794444	-34.5	0.877301	-35.1	0.836257	-36.6	0.916667	-37.9	0.82659	-40.2	0.841176	-33.9	0.764706	-35.2	0.798883	-37.4	0.82659	-38.2	0.777174	-40.2	0.704433		-40	0.52381	-40.8	0.595833	-36.1	0.85119	-36.3	0.831395	-40.8	0.733333		-40.1	0.711443	-39.4	0.514388	-39.7	0.478261
-33.4	0.8	-34.5	0.883436	-35.1	0.842105	-36.7	0.923077	-38	0.83237	-40.2	0.847059	-33.9	0.770053	-35.2	0.804469	-37.4	0.83237	-38.2	0.782609	-40.2	0.70936		-40	0.527473	-40.8	0.6	-36.1	0.857143	-36.3	0.837209	-40.8	0.738462		-40.1	0.716418	-39.4	0.517986	-39.7	0.481605
-33.4	0.805556	-34.5	0.889571	-35.1	0.847953	-36.7	0.929487	-38	0.83815	-40.2	0.852941	-33.9	0.775401	-35.2	0.810056	-37.4	0.83815	-38.3	0.788043	-40.2	0.714286		-40.1	0.531136	-40.8	0.604167	-36.1	0.863095	-36.3	0.843023	-40.8	0.74359		-40.1	0.721393	-39.4	0.521583	-39.7	0.48495
-33.4	0.811111	-34.5	0.895706	-35.2	0.853801	-36.7	0.935897	-38	0.843931	-40.3	0.858824	-34	0.780749	-35.3	0.815642	-37.4	0.843931	-38.3	0.793478	-40.2	0.719212		-40.1	0.534799	-40.8	0.608333	-36.1	0.869048	-36.3	0.848837	-40.8	0.748718		-40.1	0.726368	-39.4	0.52518	-39.7	0.488294
-33.4	0.816667	-34.5	0.90184	-35.2	0.859649	-36.8	0.942308	-38	0.849711	-40.3	0.864706	-34	0.786096	-35.3	0.821229	-37.5	0.849711	-38.3	0.798913	-40.2	0.724138		-40.1	0.538462	-40.8	0.6125	-36.2	0.875	-36.3	0.854651	-40.8	0.753846		-40.1	0.731343	-39.4	0.528777	-39.7	0.491639
-33.4	0.822222	-34.5	0.907975	-35.2	0.865497	-36.8	0.948718	-38	0.855491	-40.3	0.870588	-34	0.791444	-35.3	0.826816	-37.5	0.855491	-38.3	0.804348	-40.2	0.729064		-40.1	0.542125	-40.8	0.616667	-36.2	0.880952	-36.3	0.860465	-40.8	0.758974		-40.1	0.736318	-39.4	0.532374	-39.7	0.494983
-33.4	0.827778	-34.5	0.91411	-35.2	0.871345	-36.8	0.955128	-38	0.861272	-40.3	0.876471	-34	0.796791	-35.3	0.832402	-37.5	0.861272	-38.3	0.809783	-40.2	0.73399		-40.1	0.545788	-40.8	0.620833	-36.2	0.886905	-36.3	0.866279	-40.8	0.764103		-40.1	0.741294	-39.4	0.535971	-39.7	0.498328
-33.4	0.833333	-34.5	0.920245	-35.2	0.877193	-36.9	0.961538	-38	0.867052	-40.3	0.882353	-34	0.802139	-35.3	0.837989	-37.5	0.867052	-38.4	0.815217	-40.2	0.738916		-40.1	0.549451	-40.8	0.625	-36.2	0.892857	-36.3	0.872093	-40.8	0.769231		-40.1	0.746269	-39.4	0.539568	-39.7	0.501672
-33.4	0.838889	-34.6	0.92638	-35.2	0.883041	-36.9	0.967949	-38.1	0.872832	-40.3	0.888235	-34	0.807487	-35.3	0.843575	-37.5	0.872832	-38.5	0.820652	-40.2	0.743842		-40.1	0.553114	-40.8	0.629167	-36.2	0.89881	-36.3	0.877907	-40.8	0.774359		-40.1	0.751244	-39.4	0.543165	-39.7	0.505017
-33.4	0.844444	-34.6	0.932515	-35.2	0.888889	-36.9	0.974359	-38.1	0.878613	-40.3	0.894118	-34	0.812834	-35.3	0.849162	-37.6	0.878613	-38.5	0.826087	-40.2	0.748768		-40.1	0.556777	-40.8	0.633333	-36.2	0.904762	-36.3	0.883721	-40.8	0.779487		-40.1	0.756219	-39.4	0.546763	-39.7	0.508361
-33.4	0.85	-34.6	0.93865	-35.2	0.894737	-37	0.980769	-38.2	0.884393	-40.3	0.9	-34	0.818182	-35.3	0.854749	-37.6	0.884393	-38.6	0.831522	-40.2	0.753695		-40.1	0.56044	-40.8	0.6375	-36.2	0.910714	-36.4	0.889535	-40.8	0.784615		-40.1	0.761194	-39.4	0.55036	-39.7	0.511706
-33.4	0.855556	-34.6	0.944785	-35.2	0.900585	-37.1	0.987179	-38.2	0.890173	-40.3	0.905882	-34	0.823529	-35.3	0.860335	-37.6	0.890173	-38.7	0.836957	-40.2	0.758621		-40.1	0.564103	-40.8	0.641667	-36.2	0.916667	-36.4	0.895349	-40.9	0.789744		-40.1	0.766169	-39.5	0.553957	-39.7	0.51505
-33.4	0.861111	-34.6	0.95092	-35.2	0.906433	-37.1	0.99359	-38.2	0.895954	-40.3	0.911765	-34	0.828877	-35.3	0.865922	-37.7	0.895954	-38.7	0.842391	-40.2	0.763547		-40.1	0.567766	-40.8	0.645833	-36.2	0.922619	-36.4	0.901163	-40.9	0.794872		-40.2	0.771144	-39.5	0.557554	-39.7	0.518395
-33.5	0.866667	-34.6	0.957055	-35.2	0.912281	-37.2	1	-38.3	0.901734	-40.3	0.917647	-34	0.834225	-35.3	0.871508	-37.7	0.901734	-38.8	0.847826	-40.2	0.768473		-40.1	0.571429	-40.8	0.65	-36.2	0.928571	-36.4	0.906977	-40.9	0.8		-40.2	0.776119	-39.5	0.561151	-39.7	0.521739
-33.5	0.872222	-34.6	0.96319	-35.2	0.918129			-38.3	0.907514	-40.3	0.923529	-34	0.839572	-35.3	0.877095	-37.7	0.907514	-38.8	0.853261	-40.2	0.773399		-40.1	0.575092	-40.8	0.654167	-36.2	0.934524	-36.4	0.912791	-40.9	0.805128		-40.2	0.781095	-39.5	0.564748	-39.7	0.525084
-33.5	0.877778	-34.6	0.969325	-35.2	0.923977			-38.3	0.913295	-40.3	0.929412	-34	0.84492	-35.3	0.882682	-37.8	0.913295	-38.8	0.858696	-40.2	0.778325		-40.1	0.578755	-40.8	0.658333	-36.2	0.940476	-36.4	0.918605	-40.9	0.810256		-40.2	0.78607	-39.5	0.568345	-39.7	0.528428
-33.5	0.883333	-34.7	0.97546	-35.2	0.929825			-38.4	0.919075	-40.3	0.935294	-34	0.850267	-35.3	0.888268	-37.8	0.919075	-38.9	0.86413	-40.2	0.783251		-40.1	0.582418	-40.8	0.6625	-36.3	0.946429	-36.4	0.924419	-40.9	0.815385		-40.2	0.791045	-39.5	0.571942	-39.7	0.531773
-33.5	0.888889	-34.7	0.981595	-35.3	0.935673			-38.4	0.924855	-40.3	0.941176	-34.1	0.855615	-35.3	0.893855	-37.8	0.924855	-38.9	0.869565	-40.2	0.788177		-40.1	0.586081	-40.8	0.666667	-36.3	0.952381	-36.4	0.930233	-40.9	0.820513		-40.2	0.79602	-39.5	0.57554	-39.7	0.535117
-33.6	0.894444	-34.7	0.98773	-35.3	0.94152			-38.4	0.930636	-40.3	0.947059	-34.1	0.860963	-35.3	0.899441	-37.8	0.930636	-38.9	0.875	-40.2	0.793103		-40.1	0.589744	-40.8	0.670833	-36.3	0.958333	-36.4	0.936047	-40.9	0.825641		-40.2	0.800995	-39.5	0.579137	-39.7	0.538462
-33.6	0.9	-34.8	0.993865	-35.3	0.947368			-38.4	0.936416	-40.3	0.952941	-34.1	0.86631	-35.3	0.905028	-37.9	0.936416	-38.9	0.880435	-40.2	0.79803		-40.1	0.593407	-40.8	0.675	-36.3	0.964286	-36.4	0.94186	-40.9	0.830769		-40.2	0.80597	-39.5	0.582734	-39.7	0.541806
-33.6	0.905556	-34.8	1	-35.3	0.953216			-38.5	0.942197	-40.3	0.958824	-34.1	0.871658	-35.3	0.910615	-37.9	0.942197	-38.9	0.88587	-40.3	0.802956		-40.1	0.59707	-40.8	0.679167	-36.3	0.970238	-36.4	0.947674	-40.9	0.835897		-40.2	0.810945	-39.5	0.586331	-39.7	0.545151
-33.6	0.911111			-35.3	0.959064			-38.7	0.947977	-40.3	0.964706	-34.1	0.877005	-35.4	0.916201	-38	0.947977	-39	0.891304	-40.3	0.807882		-40.1	0.600733	-40.8	0.683333	-36.3	0.97619	-36.4	0.953488	-40.9	0.841026		-40.2	0.81592	-39.5	0.589928	-39.7	0.548495
-33.6	0.916667			-35.3	0.964912			-38.7	0.953757	-40.4	0.970588	-34.1	0.882353	-35.4	0.921788	-38	0.953757	-39	0.896739	-40.3	0.812808		-40.1	0.604396	-40.8	0.6875	-36.5	0.982143	-36.4	0.959302	-40.9	0.846154		-40.2	0.820896	-39.5	0.593525	-39.7	0.551839
-33.6	0.922222			-35.3	0.97076			-38.8	0.959538	-40.4	0.976471	-34.1	0.887701	-35.4	0.927374	-38	0.959538	-39	0.902174	-40.3	0.817734		-40.1	0.608059	-40.8	0.691667	-36.5	0.988095	-36.5	0.965116	-40.9	0.851282		-40.2	0.825871	-39.5	0.597122	-39.7	0.555184
-33.6	0.927778			-35.4	0.976608			-38.9	0.965318	-40.4	0.982353	-34.1	0.893048	-35.4	0.932961	-38	0.965318	-39	0.907609	-40.3	0.82266		-40.1	0.611722	-40.8	0.695833	-36.6	0.994048	-36.5	0.97093	-40.9	0.85641		-40.3	0.830846	-39.5	0.600719	-39.7	0.558528
-33.6	0.933333			-35.5	0.982456			-39	0.971098	-40.4	0.988235	-34.1	0.898396	-35.4	0.938547	-38	0.971098	-39	0.913043	-40.3	0.827586		-40.1	0.615385	-40.8	0.7	-36.9	1	-36.5	0.976744	-40.9	0.861538		-40.3	0.835821	-39.5	0.604317	-39.8	0.561873
-33.6	0.938889			-35.6	0.988304			-39.2	0.976879	-40.4	0.994118	-34.1	0.903743	-35.4	0.944134	-38.2	0.976879	-39.1	0.918478	-40.3	0.832512		-40.1	0.619048	-40.8	0.704167			-36.5	0.982558	-40.9	0.866667		-40.3	0.840796	-39.5	0.607914	-39.8	0.565217
-33.6	0.944444			-35.6	0.994152			-39.3	0.982659	-40.4	1	-34.1	0.909091	-35.4	0.949721	-38.3	0.982659	-39.2	0.923913	-40.3	0.837438		-40.1	0.622711	-40.8	0.708333			-36.5	0.988372	-40.9	0.871795		-40.3	0.845771	-39.5	0.611511	-39.8	0.568562
-33.6	0.95			-35.6	1			-39.3	0.988439			-34.1	0.914439	-35.4	0.955307	-38.5	0.988439	-39.2	0.929348	-40.3	0.842365		-40.1	0.626374	-40.9	0.7125			-36.6	0.994186	-40.9	0.876923		-40.3	0.850746	-39.5	0.615108	-39.8	0.571906
-33.6	0.955556							-39.4	0.99422			-34.1	0.919786	-35.4	0.960894	-38.7	0.99422	-39.2	0.934783	-40.3	0.847291		-40.1	0.630037	-40.9	0.716667			-36.7	1	-40.9	0.882051		-40.3	0.855721	-39.5	0.618705	-39.8	0.575251
-33.7	0.961111							-39.6	1			-34.1	0.925134	-35.5	0.96648	-39.2	1	-39.3	0.940217	-40.3	0.852217		-40.1	0.6337	-40.9	0.720833					-40.9	0.887179		-40.3	0.860697	-39.5	0.622302	-39.8	0.578595
-33.7	0.966667											-34.1	0.930481	-35.5	0.972067			-39.3	0.945652	-40.3	0.857143		-40.2	0.637363	-40.9	0.725					-40.9	0.892308		-40.3	0.865672	-39.5	0.625899	-39.8	0.58194
-33.8	0.972222											-34.1	0.935829	-35.6	0.977654			-39.3	0.951087	-40.3	0.862069		-40.2	0.641026	-40.9	0.729167					-40.9	0.897436		-40.3	0.870647	-39.5	0.629496	-39.8	0.585284
-33.8	0.977778											-34.1	0.941176	-35.6	0.98324			-39.4	0.956522	-40.3	0.866995		-40.2	0.644689	-40.9	0.733333					-41	0.902564		-40.3	0.875622	-39.5	0.633094	-39.8	0.588629
-33.8	0.983333											-34.1	0.946524	-36	0.988827			-39.4	0.961957	-40.3	0.871921		-40.2	0.648352	-40.9	0.7375					-41	0.907692		-40.3	0.880597	-39.5	0.636691	-39.8	0.591973
-33.8	0.988889											-34.2	0.951872	-36	0.994413			-39.5	0.967391	-40.3	0.876847		-40.2	0.652015	-40.9	0.741667					-41	0.912821		-40.3	0.885572	-39.5	0.640288	-39.8	0.595318
-34	0.994444											-34.2	0.957219	-36.4	1			-39.5	0.972826	-40.3	0.881773		-40.2	0.655678	-40.9	0.745833					-41	0.917949		-40.3	0.890547	-39.5	0.643885	-39.8	0.598662
-34.1	1											-34.2	0.962567					-39.6	0.978261	-40.3	0.8867		-40.2	0.659341	-40.9	0.75					-41	0.923077		-40.4	0.895522	-39.5	0.647482	-39.8	0.602007
												-34.2	0.967914					-39.6	0.983696	-40.4	0.891626		-40.2	0.663004	-40.9	0.754167					-41	0.928205		-40.4	0.900498	-39.5	0.651079	-39.8	0.605351
												-34.2	0.973262					-39.6	0.98913	-40.4	0.896552		-40.2	0.666667	-40.9	0.758333					-41	0.933333		-40.4	0.905473	-39.5	0.654676	-39.8	0.608696
												-34.2	0.97861					-39.7	0.994565	-40.4	0.901478		-40.2	0.67033	-40.9	0.7625					-41	0.938462		-40.4	0.910448	-39.6	0.658273	-39.8	0.61204
												-34.3	0.983957					-39.7	1	-40.4	0.906404		-40.2	0.673993	-40.9	0.766667					-41	0.94359		-40.4	0.915423	-39.6	0.661871	-39.8	0.615385
												-34.3	0.989305							-40.4	0.91133		-40.2	0.677656	-40.9	0.770833					-41.1	0.948718		-40.4	0.920398	-39.6	0.665468	-39.8	0.618729
												-34.3	0.994652							-40.4	0.916256		-40.2	0.681319	-40.9	0.775					-41.1	0.953846		-40.4	0.925373	-39.6	0.669065	-39.8	0.622074
												-34.3	1							-40.4	0.921182		-40.2	0.684982	-40.9	0.779167					-41.1	0.958974		-40.4	0.930348	-39.6	0.672662	-39.8	0.625418
																				-40.4	0.926108		-40.2	0.688645	-40.9	0.783333					-41.1	0.964103		-40.4	0.935323	-39.6	0.676259	-39.8	0.628763
																				-40.4	0.931034		-40.2	0.692308	-40.9	0.7875					-41.1	0.969231		-40.4	0.940299	-39.6	0.679856	-39.8	0.632107
																				-40.4	0.935961		-40.2	0.695971	-40.9	0.791667					-41.1	0.974359		-40.4	0.945274	-39.6	0.683453	-39.8	0.635452
																				-40.4	0.940887		-40.2	0.699634	-40.9	0.795833					-41.1	0.979487		-40.4	0.950249	-39.6	0.68705	-39.8	0.638796
																				-40.4	0.945813		-40.2	0.703297	-40.9	0.8					-41.1	0.984615		-40.5	0.955224	-39.6	0.690647	-39.8	0.64214
																				-40.4	0.950739		-40.2	0.70696	-40.9	0.804167					-41.1	0.989744		-40.5	0.960199	-39.6	0.694245	-39.8	0.645485
																				-40.4	0.955665		-40.2	0.710623	-41	0.808333					-41.2	0.994872		-40.5	0.965174	-39.6	0.697842	-39.8	0.648829
																				-40.4	0.960591		-40.2	0.714286	-41	0.8125					-41.2	1		-40.5	0.970149	-39.6	0.701439	-39.8	0.652174
																				-40.4	0.965517		-40.2	0.717949	-41	0.816667								-40.5	0.975124	-39.6	0.705036	-39.8	0.655518
																				-40.5	0.970443		-40.2	0.721612	-41	0.820833								-40.5	0.9801	-39.6	0.708633	-39.8	0.658863
																				-40.5	0.975369		-40.2	0.725275	-41	0.825								-40.6	0.985075	-39.6	0.71223	-39.8	0.662207
																				-40.5	0.980296		-40.2	0.728938	-41	0.829167								-40.6	0.99005	-39.6	0.715827	-39.8	0.665552
																				-40.5	0.985222		-40.2	0.732601	-41	0.833333								-40.7	0.995025	-39.6	0.719424	-39.8	0.668896
																				-40.5	0.990148		-40.2	0.736264	-41	0.8375								-40.8	1	-39.6	0.723022	-39.8	0.672241
																				-40.5	0.995074		-40.2	0.739927	-41	0.841667										-39.6	0.726619	-39.8	0.675585
																				-40.5	1		-40.2	0.74359	-41	0.845833										-39.6	0.730216	-39.9	0.67893
																							-40.2	0.747253	-41	0.85										-39.6	0.733813	-39.9	0.682274
																							-40.2	0.750916	-41	0.854167										-39.6	0.73741	-39.9	0.685619
																							-40.2	0.754579	-41	0.858333										-39.6	0.741007	-39.9	0.688963
																							-40.2	0.758242	-41	0.8625										-39.6	0.744604	-39.9	0.692308
																							-40.3	0.761905	-41	0.866667										-39.6	0.748201	-39.9	0.695652
																							-40.3	0.765568	-41	0.870833										-39.6	0.751799	-39.9	0.698997
																							-40.3	0.769231	-41	0.875										-39.6	0.755396	-39.9	0.702341
																							-40.3	0.772894	-41	0.879167										-39.6	0.758993	-39.9	0.705686
																							-40.3	0.776557	-41	0.883333										-39.6	0.76259	-39.9	0.70903
																							-40.3	0.78022	-41	0.8875										-39.6	0.766187	-39.9	0.712375
																							-40.3	0.783883	-41	0.891667										-39.6	0.769784	-39.9	0.715719
																							-40.3	0.787546	-41.1	0.895833										-39.6	0.773381	-39.9	0.719064
																							-40.3	0.791209	-41.1	0.9										-39.6	0.776978	-39.9	0.722408
																							-40.3	0.794872	-41.1	0.904167										-39.6	0.780576	-39.9	0.725753
																							-40.3	0.798535	-41.1	0.908333										-39.7	0.784173	-39.9	0.729097
																							-40.3	0.802198	-41.1	0.9125										-39.7	0.78777	-39.9	0.732441
																							-40.3	0.805861	-41.1	0.916667										-39.7	0.791367	-39.9	0.735786
																							-40.3	0.809524	-41.1	0.920833										-39.7	0.794964	-39.9	0.73913
																							-40.3	0.813187	-41.1	0.925										-39.7	0.798561	-39.9	0.742475
																							-40.3	0.81685	-41.1	0.929167										-39.7	0.802158	-39.9	0.745819
																							-40.3	0.820513	-41.2	0.933333										-39.7	0.805755	-39.9	0.749164
																							-40.3	0.824176	-41.2	0.9375										-39.7	0.809353	-39.9	0.752508
																							-40.3	0.827839	-41.2	0.941667										-39.7	0.81295	-39.9	0.755853
																							-40.3	0.831502	-41.2	0.945833										-39.7	0.816547	-39.9	0.759197
																							-40.3	0.835165	-41.2	0.95										-39.7	0.820144	-39.9	0.762542
																							-40.3	0.838828	-41.2	0.954167										-39.7	0.823741	-39.9	0.765886
																							-40.3	0.842491	-41.2	0.958333										-39.7	0.827338	-39.9	0.769231
																							-40.3	0.846154	-41.2	0.9625										-39.7	0.830935	-39.9	0.772575
																							-40.3	0.849817	-41.2	0.966667										-39.7	0.834532	-39.9	0.77592
																							-40.4	0.85348	-41.2	0.970833										-39.7	0.838129	-39.9	0.779264
																							-40.4	0.857143	-41.2	0.975										-39.7	0.841727	-39.9	0.782609
																							-40.4	0.860806	-41.3	0.979167										-39.7	0.845324	-39.9	0.785953
																							-40.4	0.864469	-41.3	0.983333										-39.7	0.848921	-40	0.789298
																							-40.4	0.868132	-41.3	0.9875										-39.7	0.852518	-40	0.792642
																							-40.4	0.871795	-41.4	0.991667										-39.7	0.856115	-40	0.795987
																							-40.4	0.875458	-41.4	0.995833										-39.8	0.859712	-40	0.799331
																							-40.4	0.879121	-41.6	1										-39.8	0.863309	-40	0.802676
																							-40.4	0.882784												-39.8	0.866906	-40	0.80602
																							-40.4	0.886447												-39.8	0.870504	-40	0.809365
																							-40.4	0.89011												-39.8	0.874101	-40	0.812709
																							-40.4	0.893773												-39.8	0.877698	-40	0.816054
																							-40.4	0.897436												-39.8	0.881295	-40	0.819398
																							-40.4	0.901099												-39.8	0.884892	-40	0.822742
																							-40.4	0.904762												-39.8	0.888489	-40	0.826087
																							-40.4	0.908425												-39.8	0.892086	-40	0.829431
																							-40.4	0.912088												-39.8	0.895683	-40	0.832776
																							-40.4	0.915751												-39.8	0.899281	-40	0.83612
																							-40.4	0.919414												-39.8	0.902878	-40	0.839465
																							-40.4	0.923077												-39.8	0.906475	-40	0.842809
																							-40.4	0.92674												-39.8	0.910072	-40	0.846154
																							-40.4	0.930403												-39.8	0.913669	-40	0.849498
																							-40.4	0.934066												-39.8	0.917266	-40	0.852843
																							-40.4	0.937729												-39.8	0.920863	-40	0.856187
																							-40.4	0.941392												-39.8	0.92446	-40	0.859532
																							-40.4	0.945055												-39.9	0.928058	-40	0.862876
																							-40.4	0.948718												-39.9	0.931655	-40	0.866221
																							-40.4	0.952381												-39.9	0.935252	-40	0.869565
																							-40.4	0.956044												-39.9	0.938849	-40	0.87291
																							-40.4	0.959707												-39.9	0.942446	-40	0.876254
																							-40.4	0.96337												-39.9	0.946043	-40	0.879599
																							-40.4	0.967033												-39.9	0.94964	-40	0.882943
																							-40.5	0.970696												-39.9	0.953237	-40	0.886288
																							-40.5	0.974359												-39.9	0.956835	-40	0.889632
																							-40.5	0.978022												-39.9	0.960432	-40	0.892977
																							-40.5	0.981685												-39.9	0.964029	-40	0.896321
																							-40.5	0.985348												-39.9	0.967626	-40.1	0.899666
																							-40.5	0.989011												-39.9	0.971223	-40.1	0.90301
																							-40.5	0.992674												-40	0.97482	-40.1	0.906355
																							-40.5	0.996337												-40	0.978417	-40.1	0.909699
																							-40.6	1												-40	0.982014	-40.1	0.913043
																																				-40	0.985612	-40.1	0.916388
																																				-40	0.989209	-40.1	0.919732
																																				-40.1	0.992806	-40.1	0.923077
																																				-40.1	0.996403	-40.1	0.926421
																																				-40.1	1	-40.1	0.929766
																																						-40.1	0.93311
																																						-40.1	0.936455
																																						-40.1	0.939799
																																						-40.2	0.943144
																																						-40.2	0.946488
																																						-40.2	0.949833
																																						-40.2	0.953177
																																						-40.2	0.956522
																																						-40.2	0.959866
																																						-40.2	0.963211
																																						-40.2	0.966555
																																						-40.2	0.9699
																																						-40.3	0.973244
																																						-40.3	0.976589
																																						-40.3	0.979933
																																						-40.3	0.983278
																																						-40.3	0.986622
																																						-40.3	0.989967
																																						-40.3	0.993311
																																						-40.4	0.996656
																																						-40.4	1
[truncated: 14 more columns]

## Sheet: nN
Figure 3																					Figure S7
F. cyl.				F. cyl.				F. cyl.				F. cyl.				F. cyl.					P. syringae				P. syringae				P. syringae
c = 5E7 cells mL-1				c = 1E7 cells mL-1				c = 2E6 cells mL-1				c = 1E6 cells mL-1				c = 5E5 cells mL-1					c = 1.4E7 cells mL-1				c = 2.8E6 cells mL-1				c = 1.4E6 cells mL-1
T	fice	nN	# froz. Drop.	T	fice	nN	# froz. Drop.	T	fice	nN	# froz. Drop.	T	fice	nN	# froz. Drop.	T	fice	nN	# froz. Drop.		T	fice	nN	# froz. Drop.	T	fice	nN	# froz. Drop.	T	fice	nN	# froz. Drop.
°C		cell-1		°C		cell-1		°C		cell-1		°C		cell-1		°C		cell-1			°C		cell-1		°C		cell-1		°C		cell-1
-29.5	0.0111111	0.000585449	2	-23.5	0.00613497	0.00161223	1	-31.5	0.00584795	0.00768289	1	-32	0.00641026	0.016848	1	-32.8	0.00578035	0.0303753	1		-8	0.0276243	0.00524216	5	-8.5	0.0136054	0.0128175	2	-8.5	0.00564972	0.0106025	1
-30.5	0.0277778	0.00147607	3	-31.5	0.0122699	0.00323443	1	-32	0.0116959	0.0154111	1	-33.5	0.0192308	0.0508726	2	-33.1	0.0115607	0.0609276	1		-8.5	0.21547	0.0454115	34	-9	0.0884354	0.0866357	11	-9	0.0621469	0.120068	10
-31	0.0611111	0.00330407	6	-32	0.0184049	0.00486675	1	-32.5	0.0175439	0.0231852	1	-34	0.0448718	0.120277	4	-33	0.00578035	0.0303753	1		-9	0.723757	0.240741	92	-9.5	0.217687	0.229706	19	-9.5	0.129944	0.260483	12
-31.5	0.0944444	0.00519815	6	-32.5	0.0490798	0.0131845	5	-33	0.0350877	0.0467882	3	-34.5	0.160256	0.457581	18	-33.5	0.017341	0.0916592	2		-10	0.972376	0.671631	45	-10	0.387755	0.459058	25	-10	0.265537	0.57752	24
-32	0.188889	0.0109694	17	-33	0.116564	0.0324697	11	-33.5	0.0701754	0.0953096	6	-35	0.339744	1.08757	28	-34	0.0231214	0.122572	1		-10.5	0.977901	0.713388	1	-10.5	0.421769	0.512539	5	-10.5	0.305085	0.681098	7
-32.5	0.327778	0.0208104	25	-33.5	0.276074	0.0846386	26	-34	0.134503	0.189221	11	-35.5	0.653846	2.77933	49	-34.5	0.0346821	0.18495	2		-11	0.983425	0.767223	1	-11	0.489796	0.62965	10	-11	0.310734	0.696375	1
-33	0.572222	0.0444931	44	-34	0.490798	0.176817	35	-34.5	0.432749	0.742668	51	-36	0.737179	3.50087	13	-35	0.0578035	0.31198	4		-13	0.98895	0.843099	1	-11.5	0.530612	0.707667	6	-11.5	0.322034	0.727306	2
-33.5	0.888889	0.115128	57	-34.5	0.920245	0.66251	70	-35	0.783626	2.00517	60	-36.5	0.897436	5.96612	25	-35.5	0.0982659	0.541973	7		-36	0.994475	0.972809	1	-12	0.537415	0.721326	1	-12	0.333333	0.758758	2
-34	0.994444	0.272096	19	-35	1	--	13	-35.5	0.982456	5.29611	34	-37	0.980769	10.3517	13	-36	0.132948	0.747479	6		-36.5	1	--	1	-12.5	0.55102	0.749259	2	-26.5	0.338983	0.774684	1
-34.5	1	--	1					-36	1	--	3	-37.5	1	--	3	-36.5	0.219653	1.29954	15						-13	0.564626	0.778051	2	-27	0.344633	0.790747	1
																-37	0.352601	2.27819	23						-13.5	0.578231	0.807757	2	-28.5	0.350282	0.806949	1
																-37.5	0.676301	5.91009	56						-16	0.585034	0.822971	1	-29	0.355932	0.823293	1
																-38	0.867052	10.5727	33						-26	0.591837	0.838437	1	-32	0.361582	0.839781	1
																-38.5	0.942197	14.9369	13						-28.5	0.598639	0.854163	1	-33	0.372881	0.873198	2
																-39	0.971098	18.5688	5						-30	0.605442	0.870158	1	-33.5	0.384181	0.907223	2
																-39.5	0.99422	27.0018	4						-35	0.639456	0.954509	5	-34	0.389831	0.92447	1
																-40	1	--	1						-35.5	0.659864	1.00903	3	-34.5	0.39548	0.941878	1
																									-36	0.768707	1.36988	16	-35	0.40113	0.95945	1
																									-36.5	0.979592	3.64144	31	-35.5	0.418079	1.01318	3
																									-37	1	--	3	-36	0.536723	1.43986	21
																													-36.5	0.960452	6.04484	75
																													-37	1	--	7

## Sheet: nm
Figure 7 and Figure S9
F. cyl.		F. cyl.		F. cyl.		F. cyl.		F. cyl.
c = 5E7 cells mL-1		c = 1E7 cells mL-1		c = 2E6 cells mL-1		c = 1E6 cells mL-1		c = 5E5 cells mL-1
T_corr.	nm_tot	T_corr.	nm_tot	T_corr.	nm_tot	T_corr.	nm_tot	T_corr.	nm_tot
°C	g-1	°C	g-1	°C	g-1	°C	g-1	°C	g-1
-25.5	13107500	-27.5	72414900	-27.5	172010000	-28	377206000	-29	680064000
-26.5	33047400	-28	108960000	-28	345035000	-29.5	1138970000	-29.5	2052130000
-27	73973900	-28.5	295183000	-28.5	519087000	-30	2692850000	-30	2744230000
-27.5	116380000	-29	726956000	-29	1047530000	-30.5	10244700000	-30.5	4140810000
-28	245590000	-29.5	1894950000	-29.5	2133860000			-31	6984840000
-28.5	465918000	-30	3958700000	-30	4236420000			-31.5	12134100000
-29	996145000	-30.5	14832800000	-30.5	16627400000			-32	16735100000
-29.5	2577580000	-31	21746200000	-31	22278400000			-32.5	29095000000
-30	6091890000	-31	--					-33	51005800000
								-33.5	132319000000
