# Supplementary material for: Ice nucleating properties of the sea ice diatom Fragilariopsis cylindrus and its exudates
Source: Copernicus journal article supplement (doi:10.5194/bg-20-1-2023), 2023-01-02
Supplement: Supplementary file 3 [file bg-20-1-2023-supplement.zip]

Archive with 3 entries (3 files):
- F. cylindrus SI_final submission_corrected.pdf
- Data_Fcyl_Paper.xlsx
- bg-20-1-2023-supplement-title-page.pdf
